# Supplementary material for: Identification and comparative analysis of the ovarian microRNAs of prolific and non-prolific goats during the follicular phase using high-throughput sequencing
Source: PubMed Central journal article supplement (PMC5432505; doi:10.1038/s41598-017-02225-x), 2017-05-15
Supplement: 41598_2017_2225_MOESM1_ESM.pdf [file 41598_2017_2225_MOESM1_ESM.pdf]

**Supplementary Information**

**Identification and comparative analysis of the ovarian microRNAs of prolific and non-prolific goats during the follicular phase using high-throughput sequencing**

**Xiang-dong Zi<sup>\*</sup>, Jian-yuan Lu & Li Ma**

Key-Laboratory for Animal Science of State Ethnic Affairs Commission, Southwest University for Nationalities, Chengdu 610041, PR China.

**\*Correspondence:** zixd2000@yahoo.com

Key-Laboratory for Animal Science of State Ethnic Affairs Commission, Southwest University for Nationalities, Chengdu 610041, PR China

### Supplementary Table S1

Composition of small RNA classes of the Solexa in the ovaries of Tibetan goat (a) and Jintang black goat (b)

#### (a) Non-prolific Tibetan goat

| Category         | unique reads | % of unique reads | total reads | % of total reads |
|------------------|--------------|-------------------|-------------|------------------|
| clean reads      | 881509       | 100.00            | 11192277    | 100.00           |
| match genome     | 177165       | 20.10             | 5362108     | 47.91            |
| exon_antisense   | 967          | 0.11              | 1242        | 0.01             |
| exon_sense       | 49011        | 5.56              | 59091       | 0.53             |
| intron_antisense | 5006         | 0.57              | 27040       | 0.24             |
| intron_sense     | 30275        | 3.43              | 88254       | 0.79             |
| miRNA            | 3187         | 0.36              | 4717201     | 42.15            |
| rRNA             | 58191        | 6.60              | 369523      | 3.30             |
| repeat           | 31148        | 3.53              | 86164       | 0.77             |
| snRNA            | 5798         | 0.66              | 18882       | 0.17             |
| snoRNA           | 9573         | 1.09              | 71927       | 0.64             |
| tRNA             | 8475         | 0.96              | 30762       | 0.27             |
| unann            | 679878       | 77.13             | 5722191     | 51.13            |

#### (b) Prolific Jintang black goat

| Category         | unique reads | % of unique reads | total reads | % of total reads |
|------------------|--------------|-------------------|-------------|------------------|
| clean reads      | 719416       | 100.00            | 11341703    | 100.00           |
| match genome     | 137731       | 19.14             | 5595846     | 49.34            |
| exon_antisense   | 869          | 0.12              | 1126        | 0.01             |
| exon_sense       | 34901        | 4.85              | 41316       | 0.36             |
| intron_antisense | 4601         | 0.64              | 22524       | 0.20             |
| intron_sense     | 21856        | 3.04              | 78205       | 0.69             |
| miRNA            | 3307         | 0.46              | 5128858     | 45.22            |
| rRNA             | 38290        | 5.32              | 204053      | 1.80             |
| repeat           | 24180        | 3.36              | 62403       | 0.55             |
| snRNA            | 4425         | 0.62              | 12741       | 0.11             |
| snoRNA           | 10087        | 1.40              | 81342       | 0.72             |
| tRNA             | 7865         | 1.09              | 30609       | 0.27             |
| unann            | 569035       | 79.10             | 5678526     | 50.07            |

## Supplementary Table S2

Conserved miRNAs in the ovaries of Tibetan goat (a) and Jintang black goat (b) during follicular phase

### (a) Non-prolific Tibetan goat

| miRNA           | Counts | Sequence                 |
|-----------------|--------|--------------------------|
| chi-miR-99a-5p  | 973391 | AACCCGTAGATCCGATCTTGT    |
| chi-miR-148a-3p | 891044 | TCAGTGCACACTACAGAACTTTGT |
| chi-miR-143-3p  | 597073 | TGAGATGAAGCACTGTAGCTCG   |
| chi-miR-10b-5p  | 375466 | TACCCTGTAGAACCGAATTTGT   |
| chi-miR-26a-5p  | 264052 | TTCAAGTAATCCAGGATAGGCT   |
| chi-miR-21-5p   | 158549 | TAGCTTATCAGACTGATGTTGAC  |
| chi-miR-125b-5p | 114899 | TCCCTGAGACCCTAACTTGT     |
| chi-miR-27b-3p  | 109607 | TTCACAGTGGCTAAGTTCTGC    |
| chi-let-7f-5p   | 108566 | TGAGGTAGTAGATTGTATAGTT   |
| chi-miR-101-3p  | 86961  | TACAGTACTGTGATAACTGA     |
| chi-miR-100-5p  | 82633  | AACCCGTAGATCCGAACTTGT    |
| chi-let-7i-5p   | 69326  | TGAGGTAGTAGTTTGTGCTGTT   |
| chi-let-7g-5p   | 60544  | TGAGGTAGTAGTTTGTACAGTT   |
| chi-miR-145-5p  | 60065  | GTCCAGTTTTCCAGGAATCCCT   |
| chi-miR-126-3p  | 49103  | TCGTACCGTGAGTAATAATGC    |
| chi-miR-199a-3p | 44884  | ACAGTAGTCTGCACATTGGTT    |
| chi-miR-199b-3p | 44881  | ACAGTAGTCTGCACATTGGTT    |
| chi-miR-199c-3p | 44881  | ACAGTAGTCTGCACATTGGTT    |
| chi-let-7a-5p   | 39199  | TGAGGTAGTAGGTTGTATAGTT   |
| chi-miR-125a-5p | 38255  | TCCCTGAGACCCTTTAACCTGT   |
| chi-let-7c-5p   | 29712  | TGAGGTAGTAGGTTGTATGGTT   |
| chi-miR-30a-5p  | 29399  | TGTAACATCCTCGACTGGAAGCT  |
| chi-miR-140-3p  | 28454  | ACCACAGGGTAGAACCACGGAC   |
| chi-miR-199a-5p | 27543  | CCCAGTGTTCACTACTACCTGTTC |
| chi-let-7b-5p   | 23396  | TGAGGTAGTAGGTTGTGTGGTT   |
| chi-miR-29a-3p  | 21523  | TAGCACCATCTGAAATCGGTT    |
| chi-miR-99b-5p  | 20313  | CACCCGTAGAACCGACCTTGCG   |
| chi-miR-26b-5p  | 19589  | TTCAAGTAATTCAGGATAGGTT   |
| chi-miR-191-5p  | 14900  | CAACGGAATCCCAAAGCAGCT    |
| chi-miR-10a-5p  | 14037  | TACCCTGTAGATCCGAATTTGT   |
| chi-miR-25-3p   | 13875  | CATTGCACTTGTCTCGGTCTGA   |
| chi-miR-532-5p  | 13684  | CATGCCTTGAGTGTAGGACCGT   |
| chi-miR-92a-3p  | 12497  | TATTGCACTTGTCCCGGCCTGT   |
| chi-miR-22-3p   | 11104  | AAGCTGCCAGTTGAAGAAC      |
| chi-miR-24-3p   | 11089  | TGGCTCAGTTCAGCAGGAAC     |

|                 |       |                          |
|-----------------|-------|--------------------------|
| chi-miR-92b     | 10966 | TATTGCACTTGTCCCGGCCTGT   |
| chi-miR-151-3p  | 10642 | CTAGACTGAAGCTCCTTGAGG    |
| chi-miR-542-3p  | 10575 | TGTGACAGATTGATAACTGA     |
| chi-miR-202-5p  | 9197  | TTCCTATGCATATACTTCTTT    |
| chi-miR-455-5p  | 8469  | TATGTGCCTTTGGACTACATCG   |
| chi-miR-16a-5p  | 8322  | TAGCAGCACGTAAATATTGGAG   |
| chi-let-7e-5p   | 7815  | TGAGGTAGGAGGTTGTATAGTT   |
| chi-miR-30e-5p  | 7721  | TGTAAACATCCTTGACTGGAAGCT |
| chi-miR-1       | 7482  | TGGAATGTAAAGAAGTATGTAT   |
| chi-miR-148b-3p | 7161  | TCAGTGCATCACAGAACTTTGT   |
| chi-miR-30c-5p  | 6951  | TGTAAACATCCTACACTCTCAGC  |
| chi-miR-145-3p  | 6317  | ATTCCTGGAAATACTGTTCTT    |
| chi-miR-199b-5p | 6238  | CCCAGTGTTTAGACTATCTGTTC  |
| chi-miR-199c-5p | 6238  | CCCAGTGTTTAGACTATCTGTTC  |
| chi-miR-27a-3p  | 5845  | TTCACAGTGGCTAAGTTCCG     |
| chi-miR-450-5p  | 5743  | TTTTGCGATGTGTTCCCTAAT    |
| chi-miR-23b-3p  | 5484  | ATCACATTGCCAGGGATTACC    |
| chi-miR-122     | 5326  | TGGAGTGTGACAATGGTGTTCG   |
| chi-miR-23a     | 5038  | ATCACATTGCCAGGGATTCC     |
| chi-miR-423-3p  | 4956  | AGCTCGGTCTGAGGCCCTCAGT   |
| chi-miR-320-3p  | 4888  | AAAAGCTGGGTTGAGAGGGCGA   |
| chi-miR-224-5p  | 4835  | CAAGTCACTAGTGGTTCCGTTT   |
| chi-miR-361-3p  | 4645  | TCCCCCAGGTGTGATTCTGATT   |
| chi-miR-186-5p  | 4634  | CAAAGAATTCTCCTTTTGGGCT   |
| chi-miR-103-3p  | 4592  | AGCAGCATTGTACAGGGCTATGA  |
| chi-miR-98-5p   | 4046  | TGAGGTAGTAAGTTGTATTGTT   |
| chi-miR-708-3p  | 3836  | CATCTAGACTGTGAGCTTCTAGA  |
| chi-miR-342-3p  | 3630  | TCTCACACAGAAATCGCACCCA   |
| chi-miR-28-3p   | 3593  | CACTAGATTGAGAGCTCCTGGA   |
| chi-miR-3431-5p | 3567  | CCTCAGTCAGCCTTGTGGATGT   |
| chi-miR-125b-3p | 3425  | ACAAGTCAGGCTCTTGGGACC    |
| chi-miR-192-5p  | 3378  | CTGACCTATGAATTGACAGCC    |
| chi-miR-20a-5p  | 3293  | TAAAGTGCTTATAGTGCAGGTAG  |
| chi-miR-30b-5p  | 3206  | TGTAAACATCCTACACTCAGCT   |
| chi-miR-127-3p  | 3178  | TCGGATCCGTCTGAGCTTGG     |
| chi-miR-204-5p  | 3139  | TTCCCTTTGTATCCTATGCCT    |
| chi-miR-374b-5p | 2828  | ATATAATAACAACCTGCTAAGTG  |
| chi-miR-378-3p  | 2825  | ACTGGACTTGGAGTCAGAAGGC   |
| chi-miR-218     | 2822  | TTGTGCTTGATCTAACCATGT    |
| chi-miR-423-5p  | 2611  | TGAGGGGCAGAGAGCGAGACTTT  |
| chi-miR-424-5p  | 2595  | CAGCAGCAATTCATGTTTTGA    |
| chi-miR-30e-3p  | 2385  | CTTTCAGTCGGATGTTTACAG    |
| chi-miR-200a    | 2275  | TAACACTGTCTGGTAACGATG    |

|                 |      |                          |
|-----------------|------|--------------------------|
| chi-miR-660     | 2187 | TACCCATTGCATATCGGAGCTGT  |
| chi-miR-340-5p  | 2092 | TTATAAAGCAATGAGACTGATT   |
| chi-miR-16b-5p  | 2088 | TAGCAGCACGTAAATATTGGGG   |
| chi-miR-7-5p    | 2011 | TGGAAGACTAGTGATTTTGTGT   |
| chi-miR-143-5p  | 1991 | GGTGCAGTGCTGCATCTCTGG    |
| chi-miR-151-5p  | 1938 | TCGAGGAGCTCACAGTCTAGT    |
| chi-miR-455-3p  | 1719 | GCAGTCCATGGGCATATACACT   |
| chi-miR-155-5p  | 1630 | TTAATGCTAATCGTGATAGGGGT  |
| chi-miR-200b    | 1626 | TAATACTGCCTGGTAATGATGA   |
| chi-miR-214-3p  | 1623 | TACAGCAGGCACAGACAGGC     |
| chi-miR-93-5p   | 1582 | CAAAGTGCTGTTCGTGCAGGTAG  |
| chi-miR-29b-3p  | 1577 | TAGCACCATTTGAAATCAGT     |
| chi-miR-195-3p  | 1529 | CCAATATTGGCTGTGCTGCTC    |
| chi-miR-328-3p  | 1503 | CTGGCCCTCTCTGCCCTTCCGT   |
| chi-let-7d-5p   | 1452 | AGAGGTAGTAGGTTGCATAGTT   |
| chi-miR-126-5p  | 1438 | CATTATTACTTTTGGTACGCGC   |
| chi-miR-3432-5p | 1391 | TGCGGGATCTTTAGTTGTGGCG   |
| chi-miR-451-5p  | 1377 | AAACCGTTACCATTACTGA      |
| chi-miR-374a-3p | 1325 | CTTATCAGGTTGTATTGTAATT   |
| chi-miR-140-5p  | 1309 | CAGTGGTTTTACCCTATGGTAG   |
| chi-miR-148a-5p | 1306 | AAAGTTCTGAGACACTCCGACT   |
| chi-miR-128-3p  | 1263 | TCACAGTGAACCGGTCTCTTT    |
| chi-miR-374a-5p | 1247 | TTATAATACAACCTGATAAGT    |
| chi-miR-379-5p  | 1201 | TGGTAGACTATGGAACGTAGG    |
| chi-miR-106b-3p | 1172 | CCGCACTGTGGGTACTIONGCT   |
| chi-miR-1271-5p | 1157 | CTTGGCACCTAGTAAGTACT     |
| chi-miR-411a-5p | 1140 | ATAGTAGACCGTATAGCGTAC    |
| chi-miR-30a-3p  | 1104 | CTTTCAGTCGGATGTTTGCAG    |
| chi-miR-106b-5p | 1033 | TAAAGTGCTGACAGTGCAGAT    |
| chi-miR-107-3p  | 1029 | AGCAGCATTGTACAGGGCTAT    |
| chi-miR-424-3p  | 988  | CAAACCGTGAGGCGCTGCTAT    |
| chi-miR-221-3p  | 972  | AGCTACATTGTCTGCTGGGTTT   |
| chi-miR-1307-3p | 894  | ACTCGGCGTGGCGTCGGTCGTGG  |
| chi-miR-499-5p  | 888  | TTAAGACTTGCAGTGATGTTT    |
| chi-miR-497-5p  | 884  | AGCAGCACACTGTGGTTTGTAC   |
| chi-miR-28-5p   | 866  | AAGGAGCTCACAGTCTATTGA    |
| chi-miR-17-5p   | 830  | CAAAGTGCTTACAGTGCAGGTAGT |
| chi-miR-1468-5p | 806  | CTCCGTTTGCCTGTTTTGCTGA   |
| chi-miR-181b-5p | 717  | AACATTCATTGCTGTCCGGTGGGT |
| chi-miR-99a-3p  | 714  | CAAGCTCGCTTCTATGGGTCTGT  |
| chi-miR-500-3p  | 694  | ATGCACCTGGGCAAGGATTCT    |
| chi-miR-150     | 657  | TCTCCAACCCTTGTACCAGTG    |
| chi-miR-19b-3p  | 656  | TGTGCAAATCCATGCAAACTGA   |

|                 |     |                          |
|-----------------|-----|--------------------------|
| chi-miR-365-3p  | 655 | TAATGCCCTAAAAATCCTTAT    |
| chi-miR-146b-5p | 646 | TGAGAACTGAATTCCATAGGCTGT |
| chi-miR-9-5p    | 636 | TCTTTGGTTATCTAGCTGTATGA  |
| chi-miR-197-3p  | 632 | TTCACCACCTTCTCCACCCAGC   |
| chi-miR-222-3p  | 623 | AGCTACATCTGGCTACTGGGTCTC |
| chi-miR-194     | 608 | TGTAACAGCAACTCCATGTGGA   |
| chi-miR-30f-5p  | 601 | TGTAAACACCCTACACTCTCAGC  |
| chi-miR-361-5p  | 534 | TTATCAGAATCTCCAGGGGTAC   |
| chi-miR-193a    | 527 | AACTGGCCCACAAAGTCCC      |
| chi-miR-193b-3p | 527 | AACTGGCCCACAAAGTCCCCT    |
| chi-miR-133a-3p | 517 | TTTGGTCCCCTTCAACCAGCTGT  |
| chi-miR-221-5p  | 463 | ACCTGGCATAACAATGTAGATT   |
| chi-miR-331-3p  | 462 | CCCCTGGGCCTATCCTAGAAC    |
| chi-miR-532-3p  | 447 | CCTCCCACACCCAAGGCTTGC    |
| chi-miR-708-5p  | 436 | AAGGAGCTTACAATCTAGCTGGG  |
| chi-miR-483     | 407 | CACTCCTCTCCTCCCGTCTTCT   |
| chi-miR-130a-3p | 399 | CAGTGCAATGTAAAAGGGCA     |
| chi-miR-362-5p  | 382 | AATCCTTGGAACCTAGGTGTGAGT |
| chi-miR-592     | 357 | TTGTGTCAATATGCGATGATGT   |
| chi-miR-195-5p  | 345 | TAGCAGCACAGAAATGTTGG     |
| chi-miR-504     | 335 | AGACCCTGGTCTGCACTCTGT    |
| chi-miR-181d    | 330 | AACATTCATTGTTGTCTGGTGGT  |
| chi-miR-136-3p  | 319 | ATCATCGTCTCAAATGAGTCT    |
| chi-miR-3431-3p | 319 | ATCTAGAGGACTGACTGAAATT   |
| chi-miR-425-5p  | 302 | AATGACACGATCACTCCCGTTGA  |
| chi-miR-196b    | 298 | TAGGTAGTTTCTCTGTTGTTGG   |
| chi-let-7d-3p   | 257 | CTATACGACCTGCTGCCTTTC    |
| chi-miR-10b-3p  | 257 | ACAGATTCGATTCTAGGGGAAT   |
| chi-miR-29c-5p  | 242 | TGACCGATTTCTCCTGGTGTTC   |
| chi-miR-1343    | 239 | CTCCTGGGGCCCGCACTCTCGC   |
| chi-miR-146a    | 230 | TGAGAACTGAATTCCATAGGTT   |
| chi-miR-34a     | 226 | TGGCAGTGTCTTAGCTGGTTGT   |
| chi-miR-135a    | 223 | TATGGCTTTTTATTCCATGTGA   |
| chi-miR-1388-5p | 223 | AGGACTGTCCAACCTGAGAAT    |
| chi-miR-99b-3p  | 219 | CAAGCTCGTGTCTGTGGGTC     |
| chi-miR-335-5p  | 209 | TCAAGAGCAATAACGAAAAAT    |
| chi-miR-136-5p  | 207 | ACTCCATTTGTTTTGATGATGG   |
| chi-miR-409-3p  | 203 | GAATGTTGCTCGGTGAACCCC    |
| chi-let-7b-3p   | 197 | CTATACAACCTACTGCCTTCT    |
| chi-miR-34c-5p  | 185 | AGGCAGTGTAGTTAGCTGATTGC  |
| chi-miR-874-3p  | 182 | CTGCCCTGGCCCAGGGACCGAC   |
| chi-miR-214-5p  | 181 | TGCCTGTCTACACTTGCTGTGC   |
| chi-miR-490     | 178 | CAACCTGGAGGACTCCATGCTGT  |

|                 |     |                         |
|-----------------|-----|-------------------------|
| chi-miR-505-3p  | 167 | TCAACACTTGCTGGTTTCCTCT  |
| chi-miR-1307-5p | 166 | TCGACCGGACCTCGACC       |
| chi-miR-500-5p  | 153 | TAATCCTTGCTACCTGGGTGAGA |
| chi-miR-24-5p   | 150 | GTGCCTACTGAGCTGATATC    |
| chi-miR-3958-3p | 150 | AGATATTGCACGGTTGATCTCT  |
| chi-miR-1388-3p | 148 | ATCTCAGGTTTCGTCAGCCCGCA |
| chi-let-7a-3p   | 147 | CTATAACAATCTACTGTCTTTCC |
| chi-miR-148b-5p | 143 | GAAGTTCTGTTATACACTCAGGC |
| chi-miR-495-3p  | 140 | AAACAAACATGGTGCACCTTCTT |
| chi-miR-493-5p  | 135 | TTGTACATGGTAGGCTTTCATT  |
| chi-miR-22-5p   | 126 | AGTTCTTCAGTGGCAAGCTTT   |
| chi-miR-340-3p  | 121 | TCCGTCTCAGTTACTTTATAGC  |
| chi-miR-296-3p  | 120 | AGGGTTGGGCGGAGGCTTTCCT  |
| chi-miR-382-3p  | 120 | AATCATTCACGGACAACACTT   |
| chi-miR-15b-5p  | 118 | TAGCAGCACATCATGGTTTACA  |
| chi-let-7i-3p   | 114 | CTGCGCAAGCTACTGCCTTGCT  |
| chi-miR-196a    | 114 | TAGGTAGTTTCATGTTGTTGG   |
| chi-miR-335-3p  | 111 | TTTTTCATTATTGCTCCTGACC  |
| chi-miR-3959-5p | 111 | GGTTGATCAGAGAACATACATT  |
| chi-miR-1249    | 109 | ACGCCCTTCCCCCCTTCTTCA   |
| chi-miR-129-5p  | 106 | CTTTTTGCGGTCTGGGCTTGC   |
| chi-let-7e-3p   | 97  | CTATACGGCCTCCTAGCTTTCC  |
| chi-miR-127-5p  | 91  | GAAGCTCAGAGGGCTCTGATTC  |
| chi-miR-30f-3p  | 91  | CTGGGAGGAGGCTGTTTACTCT  |
| chi-miR-15a-5p  | 88  | TAGCAGCACATAATGGTTTGTGG |
| chi-miR-494     | 84  | TGAAACATACACGGGAAACCTCT |
| chi-miR-331-5p  | 83  | TCTAGGTATGGTCCCAGGGAT   |
| chi-miR-374b-3p | 82  | CTTATCAGGTTGTATTATCATT  |
| chi-miR-450-3p  | 82  | ATTGGGAACATTTTGCAT      |
| chi-miR-153     | 79  | TTGCATAGTCACAAAAGTGATC  |
| chi-miR-369-3p  | 79  | AATAATACATGGTTGATCTTT   |
| chi-miR-129-3p  | 74  | AAGCCCTTACCCCAAAAAGCAT  |
| chi-miR-200c    | 73  | TAATACTGCCGGGTAATGATGGA |
| chi-miR-767     | 71  | TGCACCATGGTTGTCTGAGCAT  |
| chi-miR-202-3p  | 70  | AGAGGTGTAGGGCATGGGAA    |
| chi-miR-542-5p  | 70  | TCGGGGATCATCATGTCACGAGA |
| chi-miR-2483-5p | 69  | CGTCAACCATCCAGCTGTTTGA  |
| chi-miR-493-3p  | 69  | TGAAGGTCTACTGTGTGCCAGG  |
| chi-miR-181c-5p | 68  | AACATTCAACCTGTCGGTGAG   |
| chi-miR-181c-3p | 67  | ACCATCGACCGTTGAGTGGACC  |
| chi-miR-204-3p  | 67  | GCTGGGAAGGCAAAGGGAC     |
| chi-miR-330-3p  | 66  | CAAAGCACACGGCCTGCAGAGA  |
| chi-miR-125a-3p | 62  | ACAGGTGAGGTTCTTGGGAGC   |

|                 |    |                         |
|-----------------|----|-------------------------|
| chi-miR-409-5p  | 60 | AGGTTACCCGAGCAACTTTGCAT |
| chi-miR-30d-3p  | 59 | TTTCAGTCAGATGTTTGCTGC   |
| chi-miR-432-5p  | 59 | TCTTGAGTAGGTCATTGGGTGG  |
| chi-miR-1306-5p | 58 | CCACCTCCCCTGCAAACGTCC   |
| chi-miR-380-3p  | 58 | TATGTAATGTGGTCCACGTCT   |
| chi-miR-429     | 57 | TAATACTGTCTGGTAATGCCG   |
| chi-miR-877-5p  | 57 | GTAGAGGAGATGGCGCAGGGG   |
| chi-miR-191-3p  | 56 | CTGCGCTTGGATTTCGTTCCC   |
| chi-miR-29a-5p  | 56 | ACTGATTTCTTTTGGTGTTCA   |
| chi-miR-378-5p  | 55 | CTCCTGACTCCAGGTCCTGTGT  |
| chi-miR-543-3p  | 49 | AAACATTCGCGGTGCACTTCT   |
| chi-miR-188-5p  | 48 | CATCCCTTGCATGGTGGAGGG   |
| chi-miR-19a     | 48 | TGTGCAAATCTATGCAAACTGA  |
| chi-miR-411a-3p | 48 | TATGTAACACGGTCCACTAAC   |
| chi-miR-105a    | 46 | TCAAATGCTCAGACTCCTGTGG  |
| chi-miR-7-3p    | 46 | AACAAATCACAGTCTGCCATA   |
| chi-miR-421-3p  | 45 | ATCAACAGACATTAATTGGGCGC |
| chi-miR-130b-5p | 44 | ACTCTTCCCTGTTGCACTACT   |
| chi-miR-1296    | 42 | TTAGGGCCCTGGCTCCATCTCC  |
| chi-miR-412-5p  | 42 | TGGTCGACCAGTTGGAAAGTAAT |
| chi-miR-1248-5p | 41 | ACCTTCTTGATAAGCACTG     |
| chi-let-7c-3p   | 40 | CTGTACAACCTTCTAGCTTTCC  |
| chi-miR-454-3p  | 40 | TAGTGCAATATTGCTTATAGGGT |
| chi-miR-487b-3p | 39 | AATCGTACAGGGTCATCCACTT  |
| chi-miR-345-3p  | 38 | CCCTGAACTAGGGGTCTGGAGG  |
| chi-miR-301a-5p | 35 | GCTCTGACTTTATTGCACTAC   |
| chi-miR-330-5p  | 34 | TCTCTGGGCTGTGTCTTAG     |
| chi-miR-329b-3p | 33 | AACACACCTGGTTAACCTCT    |
| chi-miR-382-5p  | 32 | GAAGTTGTTCGTGGTGGATTCCG |
| chi-miR-411b-5p | 32 | TGGTCGACCATAAAACGTACGT  |
| chi-miR-27a-5p  | 31 | AGGGCTTAGCTGCTTGTGAGCA  |
| chi-miR-215-5p  | 30 | ATGACCTATGAATTGACAGAC   |
| chi-miR-27b-5p  | 30 | AGAGCTTAGCTGATTGGTGAAC  |
| chi-miR-363-3p  | 30 | AATTGCACGGTATCCATCTGCG  |
| chi-miR-671-3p  | 30 | TCCGGTTCTCAGGGCTCCACC   |
| chi-miR-10a-3p  | 29 | CAAATTCGTATCTAGGGGAAT   |
| chi-miR-18a-5p  | 29 | TAAGGTGCATCTAGTGCAGATAG |
| chi-miR-362-3p  | 28 | AACACACCTATTCAAGGATTCT  |
| chi-miR-130a-5p | 27 | GCTCTTTTACATTGTGCTACT   |
| chi-miR-182     | 27 | TTTGCAATGGTAGAACTCAC    |
| chi-miR-324-5p  | 27 | CGCATCCCCTAGGGCATTGGTGT |
| chi-miR-376e-3p | 27 | AACATAGAGGAAAATCCACATT  |
| chi-miR-26b-3p  | 26 | CCTGTTCTCCACTTGGCTC     |



|                 |    |                              |
|-----------------|----|------------------------------|
| chi-miR-33a-5p  | 26 | GTGCATTGTAGTTGCATTGC         |
| chi-miR-671-5p  | 26 | AGGAAGCCCTGGAGGGGCTGGAGG     |
| chi-miR-135b-5p | 25 | TATGGCTTTTCATTCTATGTGA       |
| chi-miR-2411-5p | 25 | GTGGAGTGA CTGTCAGATGCAGCCAGC |
| chi-miR-2483-3p | 25 | AAACATCTGGTTGGTTGAGAGA       |
| chi-miR-30c-3p  | 24 | CTGGGAGAGGGTTGTTTACTC        |
| chi-miR-338-3p  | 24 | TCCAGCATCAGTGATTTTGT         |
| chi-miR-1306-3p | 23 | ACGTTGGCTCTGGTGGTGATGG       |
| chi-miR-338-5p  | 23 | AACAATATCCTGGTGCTGAGT        |
| chi-miR-381     | 23 | TATACAAGGGCAAGCTCTCTGT       |
| chi-miR-425-3p  | 23 | CATCGGGAATGTCGTGTCCGCC       |
| chi-miR-655     | 23 | ATAATACATGGTTAACCTCTCT       |
| chi-miR-502b-3p | 22 | ATCCACCTGGGCAAGGATTCTGAA     |
| chi-miR-101-5p  | 21 | TCAGTTATCACAGTGCTGATGC       |
| chi-miR-147-3p  | 21 | GTGTGCGGAAATGCTTCT           |
| chi-miR-206     | 21 | TGGAATGTAAGGAAGTGTGTGGT      |
| chi-miR-491-5p  | 21 | AGTGGGGAACCCTTCCATGAGG       |
| chi-miR-9-3p    | 21 | ATAAAGCTAGATAACCGAAA         |
| chi-miR-144-3p  | 20 | TACAGTATAGATGATGTAC          |
| chi-miR-193b-5p | 20 | CGGGGTTTTGAGGGCGAGATGA       |
| chi-miR-20b     | 20 | CAAAGTGCTCACAGTGCAGGTAG      |
| chi-miR-379-3p  | 20 | TATGTAACATGGTCCACTAAC        |
| chi-miR-223-3p  | 19 | TGTCAGTTTGTCAAATACCCCA       |
| chi-miR-433     | 19 | ATCATGATGGGCTCCTCGGTGT       |
| chi-miR-758     | 19 | TTTGTGACCTGGTCCACTAACC       |
| chi-miR-93-3p   | 19 | ACTGCTGAGCCAGCACTTCCCGA      |
| chi-let-7g-3p   | 18 | CTGTACAGGCCACTGCCTTGCC       |
| chi-miR-25-5p   | 18 | AGGCGGAGACTTGGGCAATTGCT      |
| chi-miR-376c-3p | 18 | AACATAGAGGAAATTCCACGT        |
| chi-let-7f-3p   | 17 | CTATACAATCTATTGCCTTCCC       |
| chi-miR-17-3p   | 17 | ACTGCAGTGAAGGCACTTGTAGCA     |
| chi-miR-187     | 17 | TCGTGTCTTGTGTTGCAGCC         |
| chi-miR-190a-5p | 17 | TGATATGTTTGATATATTAGGTT      |
| chi-miR-34b-3p  | 17 | AATCACTAGTTCCACTGCCATC       |
| chi-miR-154b-5p | 16 | AGAGGTCTTCCATGGTGCATTC       |
| chi-miR-29b-5p  | 16 | CTGGTTTCACATGGTGGCTTAGA      |
| chi-miR-30b-3p  | 16 | CTGGGAGGTGGATGTTTACTTC       |
| chi-miR-323b    | 16 | CACAATACACGGTCGGCCTCT        |
| chi-miR-326-3p  | 16 | CCTCTGGGCCCTTCCTCCAGC        |
| chi-miR-211     | 15 | TTCCCTTTGTATCCTTTGCC         |
| chi-miR-342-5p  | 15 | AGGGGTGCTATCTGTGGTTGAGG      |
| chi-miR-345-5p  | 15 | GCTGACTCCTAGTCCAGTGCT        |
| chi-miR-628-5p  | 15 | ATGCTGACATATTTACTAGAGGG      |

|                 |    |                              |
|-----------------|----|------------------------------|
| chi-miR-141     | 14 | TAACACTGTCTGGTAAAGATGG       |
| chi-miR-183     | 14 | TATGGCACTGGTAGAATTCCTACT     |
| chi-miR-369-5p  | 14 | AGATCGACCGTGTTATATTCG        |
| chi-miR-410-3p  | 14 | AATATAACACAGATGGCCTGT        |
| chi-miR-133a-5p | 13 | AGCTGGTAAAATGGAACCAAAT       |
| chi-miR-133b    | 13 | TTTGGTCCCCTTCAACCAGCT        |
| chi-miR-146b-3p | 13 | TGCCCTAGGGACTCAGTTCTGGT      |
| chi-miR-502b-5p | 13 | TAATTCTTGCTCCCCAGGTGAG       |
| chi-miR-2332    | 12 | CGGTTTAAGGTCTTGGAGACAAAG     |
| chi-miR-3432-3p | 12 | CAGCAACTAAAGATCCCTCAGG       |
| chi-miR-485-5p  | 12 | AGAGGCTGGCCGTGATGAATTC       |
| chi-miR-224-3p  | 11 | AAATGGTACCCTAGTGACTACA       |
| chi-miR-323a-3p | 11 | CACATTACACGGTTCGACCTCT       |
| chi-miR-582-5p  | 11 | TACAGTTGTTCAACCAGTTACT       |
| chi-miR-20a-3p  | 10 | ACTGCATTATGAGCACTTAAA        |
| chi-miR-217-5p  | 10 | TACTGCATCAGGAACTGATTGGA      |
| chi-miR-301a-3p | 10 | CAGTGCAATAGTATTGTCAAAGC      |
| chi-miR-383     | 10 | AGATCAGAAGGTGATTGTGGCTT      |
| chi-miR-3955-5p | 10 | TTTGATGGCTGATCCTCTCACT       |
| chi-miR-130b-3p | 9  | CAGTGCAATGATGAAAGGGCAT       |
| chi-miR-16a-3p  | 9  | AAATTATCTCCAGTATTAAGTGTGCTGC |
| chi-miR-23b-5p  | 8  | TGGGTTCTGGCATGCTGATTT        |
| chi-miR-33a-3p  | 8  | CAATGTTTCCACAGTGCATCA        |
| chi-miR-544-5p  | 8  | TCTTGTTAAAAGGCAGATTCT        |
| chi-miR-105b-3p | 7  | CCACGGATGTTTGAGCATGTGC       |
| chi-miR-1185-3p | 7  | ATATACAGAGGGAGACTCTTAT       |
| chi-miR-1271-3p | 7  | AGTGCCTGCTATGTGCCAGG         |
| chi-miR-144-5p  | 7  | TGGGATATCATCATATACTGT        |
| chi-miR-324-3p  | 7  | ACTGCCCCAGGTGCTGCTGGG        |
| chi-miR-106a-5p | 6  | AAAAGTGCTTACAGTGCAGGTAGC     |
| chi-miR-21-3p   | 6  | CAACAGCAGTCGATGGGCTGT        |
| chi-miR-2404    | 6  | TTGCACTGCATGGTATCTG          |
| chi-miR-26a-3p  | 6  | CCTATTCTCGGTTACTTGCACG       |
| chi-miR-1814    | 5  | GTTTTGTTGGGTTTGT             |
| chi-miR-34c-3p  | 5  | AATCACTAACCACACGGCCAGG       |
| chi-miR-487a-3p | 5  | AATCATACAGGGACATCCAGTT       |
| chi-miR-147-5p  | 4  | TGAAACACTTCTGCACAACT         |
| chi-miR-154a-3p | 4  | AATCATACACGGTTCACCTACT       |
| chi-miR-15b-3p  | 4  | CGAATCATTATTTGCTGCTCT        |
| chi-miR-181b-3p | 4  | CTCACTGATCAATGAATGCAA        |
| chi-miR-18a-3p  | 4  | ACTGCCCTAAGTGCTCCTTCTGG      |
| chi-miR-223-5p  | 4  | TGTGTATTTGACAAGCTGAGTTG      |
| chi-miR-2411-3p | 4  | CTGAACTGTCTTACTCCCACATC      |

|                 |   |                                |
|-----------------|---|--------------------------------|
| chi-miR-376b-3p | 4 | ATCATAGAGGAAAATCCAT            |
| chi-miR-449a-5p | 4 | TGGCAGTGTATTGTTAGCTGG          |
| chi-miR-545-3p  | 4 | TCAACAAACATTTATTGTGTGC         |
| chi-miR-665     | 4 | ACCAGTAGGCCGAGGCCCT            |
| chi-miR-98-3p   | 4 | CTATACAACCTACTACTTTCCC         |
| chi-miR-100-3p  | 3 | CAAGCTTGTGTCTATAGGTAT          |
| chi-miR-16b-3p  | 3 | ACCAATATTATTGTGCTGCTTT         |
| chi-miR-1839    | 3 | AAGGTAGACAGAACAGGTCTTG         |
| chi-miR-216b    | 3 | AAATCTCTGCAGGCAAATGTGAT        |
| chi-miR-2331    | 3 | ACCCTGCAGCCAAAGAAGCT           |
| chi-miR-2432    | 3 | AGGATTCTAGGCTTAGAGGT           |
| chi-miR-326-5p  | 3 | CCTCGTCTGTCTGTTGGGCT           |
| chi-miR-3959-3p | 3 | TGTATGTCAACTGATCCACAGT         |
| chi-miR-485-3p  | 3 | AGTCATACACGGCTCTCCTCTCT        |
| chi-miR-1185-5p | 2 | AGAGGATACCCTTTGTATGT           |
| chi-miR-1197-3p | 2 | TAGGACACATGGTCTACTTCT          |
| chi-miR-128-5p  | 2 | CGGGGCCGTAGCACTGTCTGAGA        |
| chi-miR-134     | 2 | TGTGACTGGTTGACCAGAGGGG         |
| chi-miR-154b-3p | 2 | ATCATACATGGTTGACCTTTTTT        |
| chi-miR-190a-3p | 2 | CTATATATCAAACATATTCT           |
| chi-miR-190b    | 2 | TGATATGTTTGATATTGGGTTG         |
| chi-miR-2318    | 2 | CGTGTATGATGAATTATCTGACC        |
| chi-miR-376a    | 2 | GTAGATTCTCCTTCTATGAGT          |
| chi-miR-376d    | 2 | ATCATAGAGGAAAATCCACAT          |
| chi-miR-454-5p  | 2 | ACCCTATCGATATTGTCTCTG          |
| chi-miR-497-3p  | 2 | TCCAAACCACACTGTGATGTT          |
| chi-miR-877-3p  | 2 | TCCTCTTCTCCCTCCTCCCAGG         |
| chi-miR-92a-5p  | 2 | AGGTTGGGATCAGTTGCAATGCT        |
| chi-miR-96      | 2 | TTTGGCACTAGCACATTTTTG          |
| chi-miR-103-5p  | 1 | AGCTTCTTTACAGTGCTGCCTTGTAGCATT |
| chi-miR-105b-5p | 1 | TCAAATGCTCAGACTCCTTGGTG        |
| chi-miR-1224    | 1 | GTGAGGACTCGGGAGGTGGAGG         |
| chi-miR-188-3p  | 1 | CTCCACATGCAGGGTTTGCA           |
| chi-miR-192-3p  | 1 | CTGCCAATTCCATAGGTCACAGG        |
| chi-miR-19b-5p  | 1 | AGTTTTGCAGGTTTGCATCCAGC        |
| chi-miR-2284e   | 1 | AAAACCTGAATGAACTCTTTGG         |
| chi-miR-29c-3p  | 1 | TAGCACCATTTGAAATTGGTT          |
| chi-miR-301b    | 1 | CAGTGCAATGATATTGTCAAAGC        |
| chi-miR-329a-3p | 1 | AACACACCTGGTTAACCTTT           |
| chi-miR-33b-3p  | 1 | CAGTGCCTCGGCAGTGCAGCC          |
| chi-miR-346-5p  | 1 | TGCTGCCCCGCATGCCTGCCTCT        |
| chi-miR-376b-5p | 1 | GGTGGATATTCTTCTATGTTT          |
| chi-miR-376c-5p | 1 | GGTGGATATTCTTCTATGTTT          |

|                 |   |                         |
|-----------------|---|-------------------------|
| chi-miR-376e-5p | 1 | GGTGGATATTCCTTCTATGTTT  |
| chi-miR-380-5p  | 1 | ATGGTTGACCACAGAACATGCGC |
| chi-miR-411b-3p | 1 | TATGTCACATGGTCCACTAAT   |
| chi-miR-449b-3p | 1 | AGCCACAACCTGCCCTGCCACTT |
| chi-miR-499-3p  | 1 | GAACATCACAGCAAGTCTGTGC  |
| chi-miR-502a    | 1 | ATGCACCTGGACAAGGATTC    |
| chi-miR-543-5p  | 1 | ACCTGTGGTGCTTAAGGAG     |
| chi-miR-545-5p  | 1 | CTCAGTAAATGTTTATTGGAT   |
| chi-miR-874-5p  | 1 | CGGCCCCACGCACCAGGGTAAGA |

**(b) Prolific Jintang black goat**

| miRNA           | Counts | Sequence                  |
|-----------------|--------|---------------------------|
| chi-miR-99a-5p  | 802348 | AACCCGTAGATCCGATCTTGT     |
| chi-miR-21-5p   | 788052 | TAGCTTATCAGACTGATGTTGAC   |
| chi-miR-148a-3p | 739216 | TCAGTGCACTACAGAACTTTGT    |
| chi-miR-143-3p  | 594445 | TGAGATGAAGCACTGTAGCTCG    |
| chi-miR-10b-5p  | 376792 | TACCCTGTAGAACCGAATTTGT    |
| chi-miR-26a-5p  | 253691 | TTCAAGTAATCCAGGATAGGCT    |
| chi-miR-27b-3p  | 119279 | TTCACAGTGGCTAAGTTCTGC     |
| chi-miR-125b-5p | 113234 | TCCCTGAGACCCTAACTTGT      |
| chi-let-7f-5p   | 106187 | TGAGGTAGTAGATTGTATAGTT    |
| chi-miR-101-3p  | 84764  | TACAGTACTGTGATAACTGA      |
| chi-miR-100-5p  | 84325  | AACCCGTAGATCCGAACTTGT     |
| chi-let-7i-5p   | 84233  | TGAGGTAGTAGTTTGTGCTGTT    |
| chi-miR-145-5p  | 78542  | GTCCAGTTTTCCAGGAATCCCT    |
| chi-miR-126-3p  | 71065  | TCGTACCGTGAGTAATAATGC     |
| chi-miR-199a-3p | 65008  | ACAGTAGTCTGCACATTGGTT     |
| chi-miR-199b-3p | 65003  | ACAGTAGTCTGCACATTGGTT     |
| chi-miR-199c-3p | 65003  | ACAGTAGTCTGCACATTGGTT     |
| chi-let-7g-5p   | 56145  | TGAGGTAGTAGTTTGTACAGTT    |
| chi-miR-199a-5p | 46117  | CCCAGTGTTTCCAGACTACCTGTTC |
| chi-let-7a-5p   | 39182  | TGAGGTAGTAGGTTGTATAGTT    |
| chi-miR-30a-5p  | 35128  | TGTAAACATCCTCGACTGGAAGCT  |
| chi-miR-140-3p  | 30889  | ACCACAGGGTAGAACCACGGAC    |
| chi-miR-125a-5p | 29851  | TCCCTGAGACCCTTAACTTGT     |
| chi-let-7c-5p   | 28806  | TGAGGTAGTAGGTTGTATGGTT    |
| chi-let-7b-5p   | 25720  | TGAGGTAGTAGGTTGTGTGGTT    |
| chi-miR-199b-5p | 19222  | CCCAGTGTTTACTATCTGTTC     |
| chi-miR-199c-5p | 19222  | CCCAGTGTTTACTATCTGTTC     |
| chi-miR-29a-3p  | 17483  | TAGCACCATCTGAAATCGGTT     |
| chi-miR-99b-5p  | 16885  | CACCCGTAGAACCGACCTTGCG    |
| chi-miR-25-3p   | 15636  | CATTGCACTTGTCTCGGTCTGA    |

|                 |       |                          |
|-----------------|-------|--------------------------|
| chi-miR-532-5p  | 15541 | CATGCCTTGAGTGTAGGACCGT   |
| chi-miR-26b-5p  | 15414 | TTCAAGTAATTCAGGATAGGTT   |
| chi-miR-92a-3p  | 13918 | TATTGCACTTGTCCCGGCCTGT   |
| chi-miR-191-5p  | 13380 | CAACGGAATCCCAAAAGCAGCT   |
| chi-miR-10a-5p  | 13066 | TACCCTGTAGATCCGAATTTGT   |
| chi-miR-92b     | 12273 | TATTGCACTTGTCCCGGCCTGT   |
| chi-miR-127-3p  | 11169 | TCGGATCCGTCTGAGCTTGG     |
| chi-miR-151-3p  | 11044 | CTAGACTGAAGCTCCTTGAGG    |
| chi-miR-455-5p  | 10892 | TATGTGCCTTTGGACTACATCG   |
| chi-miR-16a-5p  | 10852 | TAGCAGCACGTAAATATTGGAG   |
| chi-miR-24-3p   | 10789 | TGGCTCAGTTCAGCAGGAAC     |
| chi-miR-1       | 9954  | TGGAATGTAAAGAAGTATGTAT   |
| chi-miR-22-3p   | 9303  | AAGCTGCCAGTTGAAGAAC      |
| chi-miR-202-5p  | 8722  | TTCTATGCATATACTTCTTT     |
| chi-miR-27a-3p  | 6901  | TTCACAGTGGCTAAGTTCCG     |
| chi-miR-30e-5p  | 6849  | TGTAAACATCCTTGACTGGAAGCT |
| chi-miR-148b-3p | 6767  | TCAGTGCATCACAGAACTTTGT   |
| chi-miR-542-3p  | 6540  | TGTGACAGATTGATAACTGA     |
| chi-miR-145-3p  | 6494  | ATTCCTGGAAATACTGTTCTT    |
| chi-miR-122     | 6443  | TGGAGTGTGACAATGGTGTTTG   |
| chi-let-7e-5p   | 6436  | TGAGGTAGGAGGTTGTATAGTT   |
| chi-miR-103-3p  | 5856  | AGCAGCATTGTACAGGGCTATGA  |
| chi-miR-23a     | 5640  | ATCACATTGCCAGGGATTTC     |
| chi-miR-378-3p  | 5501  | ACTGGACTTGGAGTCAGAAGGC   |
| chi-miR-320-3p  | 5482  | AAAAGCTGGGTTGAGAGGGCGA   |
| chi-miR-23b-3p  | 5107  | ATCACATTGCCAGGGATTACC    |
| chi-miR-30c-5p  | 5086  | TGTAAACATCCTACACTCTCAGC  |
| chi-miR-423-3p  | 5019  | AGCTCGGTCTGAGGCCCTCAGT   |
| chi-miR-20a-5p  | 4568  | TAAAGTGCTTATAGTGCAGGTAG  |
| chi-miR-224-5p  | 4459  | CAAGTCACTAGTGGTTCCGTTT   |
| chi-miR-28-3p   | 4436  | CACTAGATTGAGAGCTCCTGGA   |
| chi-miR-379-5p  | 4338  | TGGTAGACTATGGAACGTAGG    |
| chi-miR-218     | 4309  | TTGTGCTTGATCTAACCATGT    |
| chi-miR-361-3p  | 4222  | TCCCCAGGTGTGATTCTGATT    |
| chi-miR-3431-5p | 4004  | CCTCAGTCAGCCTTGTGGATGT   |
| chi-miR-186-5p  | 3988  | CAAAGAATTCTCCTTTTGGGCT   |
| chi-miR-7-5p    | 3834  | TGGAAGACTAGTGATTTTGTGTT  |
| chi-miR-125b-3p | 3694  | ACAAGTCAGGCTCTTGGGACC    |
| chi-miR-708-3p  | 3632  | CATCTAGACTGTGAGCTTCTAGA  |
| chi-miR-342-3p  | 3574  | TCTCACACAGAAATCGCACCCA   |
| chi-miR-192-5p  | 3404  | CTGACCTATGAATTGACAGCC    |
| chi-miR-450-5p  | 3396  | TTTTGCGATGTGTTCTAAT      |
| chi-miR-98-5p   | 3272  | TGAGGTAGTAAGTTGTATTGTT   |

|                 |      |                          |
|-----------------|------|--------------------------|
| chi-miR-214-3p  | 3206 | TACAGCAGGCACAGACAGGC     |
| chi-miR-411a-5p | 3020 | ATAGTAGACCGTATAGCGTAC    |
| chi-miR-16b-5p  | 2979 | TAGCAGCACGTAAATATTGGGG   |
| chi-miR-423-5p  | 2804 | TGAGGGGCAGAGAGCGAGACTTT  |
| chi-miR-660     | 2465 | TACCCATTGCATATCGGAGCTGT  |
| chi-miR-30b-5p  | 2431 | TGTAAACATCCTACACTCAGCT   |
| chi-miR-374b-5p | 2345 | ATATAATACAACCTGCTAAGTG   |
| chi-miR-340-5p  | 2248 | TTATAAAGCAATGAGACTGATT   |
| chi-miR-455-3p  | 2098 | GCAGTCCATGGGCATATACACT   |
| chi-miR-424-5p  | 2062 | CAGCAGCAATTCATGTTTTGA    |
| chi-miR-143-5p  | 1966 | GGTGCAGTGCTGCATCTCTGG    |
| chi-miR-126-5p  | 1950 | CATTATTACTTTTGGTACGCGC   |
| chi-miR-155-5p  | 1794 | TTAATGCTAATCGTGATAGGGGT  |
| chi-miR-195-3p  | 1758 | CCAATATTGGCTGTGCTGCTC    |
| chi-miR-93-5p   | 1690 | CAAAGTGCTGTTCGTGCAGGTAG  |
| chi-miR-30e-3p  | 1676 | CTTTCAGTCGGATGTTTACAG    |
| chi-miR-151-5p  | 1636 | TCGAGGAGCTCACAGTCTAGT    |
| chi-miR-150     | 1467 | TCTCCCAACCCTTGACCAGTG    |
| chi-miR-451-5p  | 1427 | AAACCGTTACCATTACTGA      |
| chi-miR-204-5p  | 1397 | TTCCCTTTGTCATCCTATGCCT   |
| chi-miR-3432-5p | 1382 | TGCGGGATCTTTAGTTGTGGCG   |
| chi-let-7d-5p   | 1291 | AGAGGTAGTAGGTTGCATAGTT   |
| chi-miR-106b-3p | 1273 | CCGCACTGTGGGTACTTGCT     |
| chi-miR-140-5p  | 1265 | CAGTGGTTTTACCCTATGGTAG   |
| chi-miR-17-5p   | 1252 | CAAAGTGCTTACAGTGCAGGTAGT |
| chi-miR-148a-5p | 1204 | AAAGTTCTGAGACACTCCGACT   |
| chi-miR-1468-5p | 1190 | CTCCGTTTGCTGTTTTGCTGA    |
| chi-miR-29b-3p  | 1174 | TAGCACCATTTGAAATCAGT     |
| chi-miR-128-3p  | 1166 | TCACAGTGAACCGGTCTCTTT    |
| chi-miR-328-3p  | 1147 | CTGGCCCTCTCTGCCCTTCCGT   |
| chi-miR-374a-3p | 1132 | CTTATCAGGTTGTATTGTAATT   |
| chi-miR-28-5p   | 1128 | AAGGAGCTCACAGTCTATTGA    |
| chi-miR-1271-5p | 1114 | CTTGGCACCTAGTAAGTACT     |
| chi-miR-181b-5p | 1110 | AACATTCATTGCTGTCGGTGGGT  |
| chi-miR-30a-3p  | 1100 | CTTTCAGTCGGATGTTTGCAG    |
| chi-miR-107-3p  | 1027 | AGCAGCATTGTACAGGGCTAT    |
| chi-miR-106b-5p | 1010 | TAAAGTGCTGACAGTGCAGAT    |
| chi-miR-146b-5p | 953  | TGAGAACTGAATTCCATAGGCTGT |
| chi-miR-221-3p  | 931  | AGCTACATTGTCTGCTGGGTTT   |
| chi-miR-374a-5p | 917  | TTATAATACAACCTGATAAGT    |
| chi-miR-136-3p  | 877  | ATCATCGTCTCAAATGAGTCT    |
| chi-miR-409-3p  | 873  | GAATGTTGCTCGGTGAACCCC    |
| chi-miR-497-5p  | 829  | AGCAGCACACTGTGGTTTGTAC   |

|                 |     |                          |
|-----------------|-----|--------------------------|
| chi-miR-1307-3p | 806 | ACTCGGCGTGGCGTCGGTTCGTGG |
| chi-miR-19b-3p  | 752 | TGTGCAAATCCATGCAAACTGA   |
| chi-miR-493-5p  | 741 | TTGTACATGGTAGGCTTTCATT   |
| chi-miR-500-3p  | 690 | ATGCACCTGGGCAAGGATTCT    |
| chi-miR-99a-3p  | 673 | CAAGCTCGCTTCTATGGGTCTGT  |
| chi-miR-222-3p  | 647 | AGCTACATCTGGCTACTGGGTCTC |
| chi-miR-133a-3p | 626 | TTTGGTCCCCTTCAACCAGCTGT  |
| chi-miR-30f-5p  | 624 | TGTAAACACCCTACACTCTCAGC  |
| chi-miR-194     | 584 | TGTAACAGCAACTCCATGTGGA   |
| chi-miR-3958-3p | 576 | AGATATTGCACGGTTGATCTCT   |
| chi-miR-136-5p  | 574 | ACTCCATTTGTTTTGATGATGG   |
| chi-miR-197-3p  | 572 | TTCACCACCTTCTCCACCCAGC   |
| chi-miR-499-5p  | 539 | TTAAGACTTGCAGTGATGTTT    |
| chi-miR-361-5p  | 506 | TTATCAGAATCTCCAGGGGTAC   |
| chi-miR-221-5p  | 503 | ACCTGGCATAACAATGTAGATT   |
| chi-miR-532-3p  | 497 | CCTCCCACACCCAAGGCTTGC    |
| chi-miR-331-3p  | 483 | CCCCTGGGCCTATCCTAGAAC    |
| chi-miR-424-3p  | 462 | CAAACCGTGAGGCGCTGCTAT    |
| chi-miR-708-5p  | 454 | AAGGAGCTTACAATCTAGCTGGG  |
| chi-miR-365-3p  | 452 | TAATGCCCTAAAAATCCTTAT    |
| chi-miR-382-3p  | 451 | AATCATTCACGGACAACACTT    |
| chi-miR-130a-3p | 450 | CAGTGCAATGTAAAAGGGCA     |
| chi-miR-494     | 440 | TGAAACATACACGGGAAACCTCT  |
| chi-miR-493-3p  | 413 | TGAAGGTCTACTGTGTGCCAGG   |
| chi-miR-362-5p  | 401 | AATCCTTGGAACCTAGGTGTGAGT |
| chi-miR-3959-5p | 384 | GGTTGATCAGAGAACATACATT   |
| chi-miR-146a    | 378 | TGAGAACTGAATTCCATAGGTT   |
| chi-miR-9-5p    | 369 | TCTTTGGTTATCTAGCTGTATGA  |
| chi-miR-195-5p  | 365 | TAGCAGCACAGAAATGTTGG     |
| chi-miR-3431-3p | 353 | ATCTAGAGGACTGACTGAAATT   |
| chi-miR-495-3p  | 339 | AAACAAACATGGTGCACCTTCTT  |
| chi-miR-193a    | 312 | AACTGGCCCACAAAGTCCC      |
| chi-miR-193b-3p | 312 | AACTGGCCCACAAAGTCCCCT    |
| chi-miR-200a    | 303 | TAACACTGTCTGGTAACGATG    |
| chi-miR-127-5p  | 298 | GAAGCTCAGAGGGCTCTGATTC   |
| chi-miR-34a     | 297 | TGGCAGTGTCTTAGCTGGTTGT   |
| chi-miR-214-5p  | 284 | TGCCTGTCTACACTTGCTGTGC   |
| chi-miR-99b-3p  | 258 | CAAGCTCGTGTCTGTGGGTC     |
| chi-miR-425-5p  | 256 | AATGACACGATCACTCCCGTTGA  |
| chi-miR-381     | 251 | TATACAAGGGCAAGCTCTCTGT   |
| chi-miR-409-5p  | 243 | AGGTTACCCGAGCAACTTTGCAT  |
| chi-miR-369-3p  | 235 | AATAATACATGGTTGATCTTT    |
| chi-miR-15b-5p  | 225 | TAGCAGCACATCATGGTTTACA   |

|                 |     |                          |
|-----------------|-----|--------------------------|
| chi-miR-200b    | 225 | TAATACTGCCTGGTAATGATGA   |
| chi-miR-335-5p  | 220 | TCAAGAGCAATAACGAAAAAT    |
| chi-miR-432-5p  | 220 | TCTTGAGTAGGTCATTGGGTGG   |
| chi-miR-10b-3p  | 211 | ACAGATTCGATTCTAGGGGAAT   |
| chi-miR-874-3p  | 203 | CTGCCCTGGCCCGAGGGACCGAC  |
| chi-miR-335-3p  | 198 | TTTTTCATTATTGCTCCTGACC   |
| chi-miR-380-3p  | 197 | TATGTAATGTGGTCCACGTCT    |
| chi-let-7b-3p   | 192 | CTATAACAACCTACTGCCTTCCT  |
| chi-let-7d-3p   | 189 | CTATACGACCTGCTGCCTTTC    |
| chi-miR-1388-5p | 186 | AGGACTGTCCAACCTGAGAAT    |
| chi-miR-1343    | 180 | CTCCTGGGGCCCGCACTCTCGC   |
| chi-miR-500-5p  | 180 | TAATCCTTGCTACCTGGGTGAGA  |
| chi-miR-411a-3p | 178 | TATGTAACACGGTCCACTAAC    |
| chi-miR-129-5p  | 174 | CTTTTTGCGGTCTGGGCTTGC    |
| chi-miR-382-5p  | 163 | GAAGTTGTTCTGTTGGTGGATTGC |
| chi-miR-130b-5p | 162 | ACTCTTCCCTGTTGCACTACT    |
| chi-miR-29c-5p  | 162 | TGACCGATTTCTCCTGGTGTTC   |
| chi-miR-490     | 147 | CAACCTGGAGGACTCCATGCTGT  |
| chi-miR-412-5p  | 144 | TGGTCGACCAGTTGGAAAGTAAT  |
| chi-miR-504     | 143 | AGACCCTGGTCTGCACTCTGT    |
| chi-miR-592     | 142 | TTGTGTCAATATGCGATGATGT   |
| chi-miR-505-3p  | 140 | TCAACACTTGCTGGTTTCCTCT   |
| chi-let-7a-3p   | 136 | CTATACAATCTACTGTCTTCC    |
| chi-miR-15a-5p  | 132 | TAGCAGCACATAATGGTTTGTGG  |
| chi-miR-1307-5p | 131 | TCGACCGGACCTCGACC        |
| chi-miR-1388-3p | 128 | ATCTCAGGTTTCGTCAGCCCGCA  |
| chi-miR-148b-5p | 126 | GAAGTTCTGTTATACACTCAGGC  |
| chi-miR-2483-5p | 125 | CGTCAACCATCCAGCTGTTTGA   |
| chi-miR-487b-3p | 124 | AATCGTACAGGGTCATCCACTT   |
| chi-miR-24-5p   | 123 | GTGCCTACTGAGCTGATATC     |
| chi-miR-30f-3p  | 116 | CTGGGAGGAGGCTGTTTACTCT   |
| chi-miR-340-3p  | 116 | TCCGTCTCAGTTACTTTATAGC   |
| chi-miR-296-3p  | 111 | AGGGTTGGGCGGAGGCTTTCT    |
| chi-miR-543-3p  | 111 | AAACATTCGCGGTGCACTTCT    |
| chi-miR-181d    | 105 | AACATTCATTGTTGTCGGTGGGT  |
| chi-let-7i-3p   | 100 | CTGCGCAAGCTACTGCCTTGCT   |
| chi-miR-22-5p   | 98  | AGTTCTTCAGTGGCAAGCTTT    |
| chi-miR-655     | 94  | ATAATACATGGTTAACCTCTCT   |
| chi-miR-331-5p  | 91  | TCTAGGTATGGTCCCAGGGAT    |
| chi-miR-330-3p  | 88  | CAAAGCACACGGCCTGCAGAGA   |
| chi-miR-27a-5p  | 84  | AGGGCTTAGCTGCTTGTGAGCA   |
| chi-miR-433     | 83  | ATCATGATGGGCTCCTCGGTGT   |
| chi-let-7e-3p   | 82  | CTATACGGCCTCCTAGCTTCC    |



|                 |    |                          |
|-----------------|----|--------------------------|
| chi-miR-129-3p  | 82 | AAGCCCTTACCCCAAAAAGCAT   |
| chi-miR-34c-5p  | 78 | AGGCAGTGTAGTTAGCTGATTGC  |
| chi-miR-411b-5p | 78 | TGGTCGACCATAAAACGTACGT   |
| chi-miR-135a    | 75 | TATGGCTTTTTATTCCCTATGTGA |
| chi-miR-223-3p  | 75 | TGTCAGTTTGTCAAATACCCCA   |
| chi-miR-1306-5p | 70 | CCACCTCCCCTGCAAACGTCC    |
| chi-miR-378-5p  | 70 | CTCCTGACTCCAGGTCCTGTGT   |
| chi-miR-202-3p  | 69 | AGAGGTGTAGGGCATGGGAA     |
| chi-miR-329b-3p | 67 | AACACACCTGGTTAACCTCT     |
| chi-miR-483     | 66 | CACTCCTCTCCTCCCGTCTTCT   |
| chi-miR-215-5p  | 64 | ATGACCTATGAATTGACAGAC    |
| chi-miR-379-3p  | 64 | TATGTAACATGGTCCACTAAC    |
| chi-miR-19a     | 61 | TGTGCAAATCTATGCAAACTGA   |
| chi-miR-877-5p  | 61 | GTAGAGGAGATGGCGCAGGGG    |
| chi-miR-376e-3p | 60 | AACATAGAGGAAAATCCACATT   |
| chi-miR-758     | 60 | TTTGTGACCTGGTCCACTAACC   |
| chi-miR-27b-5p  | 59 | AGAGCTTAGCTGATTGGTGAAC   |
| chi-miR-369-5p  | 59 | AGATCGACCGTGTTATATTCCG   |
| chi-miR-125a-3p | 58 | ACAGGTGAGGTTCTTGGGAGC    |
| chi-miR-497-3p  | 56 | TCCAAACCACACTGTGATGTT    |
| chi-miR-154b-5p | 55 | AGAGGTCTTCCATGGTGCATTC   |
| chi-miR-376c-3p | 53 | AACATAGAGGAAATTCCACGT    |
| chi-miR-7-3p    | 52 | AACAAATCACAGTCTGCCATA    |
| chi-miR-21-3p   | 50 | CAACAGCAGTCGATGGGCTGT    |
| chi-miR-30d-3p  | 49 | TTTCAGTCAGATGTTTGCTGC    |
| chi-miR-3955-5p | 49 | TTTGATGGCTGATCCTCTCACT   |
| chi-miR-421-3p  | 48 | ATCAACAGACATTAATTGGGCGC  |
| chi-miR-191-3p  | 47 | CTGCGCTTGGATTTCGTTCCC    |
| chi-miR-29a-5p  | 46 | ACTGATTTCTTTTGGTGTTCA    |
| chi-miR-410-3p  | 46 | AATATAACACAGATGGCCTGT    |
| chi-miR-454-3p  | 46 | TAGTGCAATATTGCTTATAGGGT  |
| chi-miR-671-5p  | 46 | AGGAAGCCCTGGAGGGGCTGGAGG |
| chi-miR-188-5p  | 45 | CATCCCTTGCATGGTGGAGGG    |
| chi-miR-374b-3p | 44 | CTTATCAGGTTGTATTATCATT   |
| chi-miR-211     | 43 | TTCCCTTTGTCATCCTTTGCCC   |
| chi-miR-301a-5p | 43 | GCTCTGACTTTATTGCACTAC    |
| chi-miR-330-5p  | 42 | TCTCTGGGCTGTGTCTTAG      |
| chi-miR-485-5p  | 39 | AGAGGCTGGCCGTGATGAATTC   |
| chi-miR-542-5p  | 39 | TCGGGGATCATCATGTCACGAGA  |
| chi-miR-1249    | 38 | ACGCCCTTCCCCCCTTCTTCA    |
| chi-miR-323b    | 38 | CACAATACACGGTTCGGCCTCT   |
| chi-miR-345-3p  | 38 | CCCTGAACTAGGGGTCTGGAGG   |
| chi-miR-383     | 37 | AGATCAGAAGGTGATTGTGGCTT  |

|                 |    |                             |
|-----------------|----|-----------------------------|
| chi-let-7c-3p   | 36 | CTGTACAACCTTCTAGCTTTCC      |
| chi-miR-133b    | 36 | TTTGGTCCCCTTCAACCAGCT       |
| chi-miR-18a-5p  | 36 | TAAGGTGCATCTAGTGCAGATAG     |
| chi-miR-2483-3p | 36 | AAACATCTGGTTGGTTGAGAGA      |
| chi-miR-450-3p  | 36 | ATTGGGAACATTTTGCAT          |
| chi-miR-200c    | 33 | TAATACTGCCGGGTAATGATGGA     |
| chi-miR-362-3p  | 33 | AACACACCTATTCAAGGATTC       |
| chi-miR-1296    | 32 | TTAGGGCCCTGGCTCCATCTCC      |
| chi-miR-2318    | 32 | CGTGTATGATGAATTATCTGACC     |
| chi-miR-20b     | 30 | CAAAGTGCTCACAGTGCAGGTAG     |
| chi-miR-181c-3p | 29 | ACCATCGACCGTTGAGTGGACC      |
| chi-miR-326-3p  | 29 | CCTCTGGGCCCTTCCTCCAGC       |
| chi-miR-582-5p  | 28 | TACAGTTGTTCAACCAGTTACT      |
| chi-miR-130a-5p | 27 | GCTCTTTTCACATTGTGCTACT      |
| chi-miR-206     | 27 | TGGAATGTAAGGAAGTGTGTGGT     |
| chi-miR-33a-5p  | 27 | GTGCATTGTAGTTGCATTGC        |
| chi-miR-485-3p  | 26 | AGTCATACACGGCTCTCCTCTCT     |
| chi-miR-671-3p  | 26 | TCCGTTTCTCAGGGCTCCACC       |
| chi-miR-153     | 25 | TTGCATAGTCACAAAAGTGATC      |
| chi-miR-181c-5p | 25 | AACATTCAACCTGTCGGTGAG       |
| chi-miR-665     | 25 | ACCAGTAGGCCGAGGCCCT         |
| chi-miR-30c-3p  | 24 | CTGGGAGAGGGTTGTTTACTC       |
| chi-miR-363-3p  | 24 | AATTGCACGGTATCCATCTGCG      |
| chi-miR-425-3p  | 24 | CATCGGGAATGTCGTGTCCGCC      |
| chi-miR-144-3p  | 23 | TACAGTATAGATGATGTAC         |
| chi-miR-1185-3p | 22 | ATATACAGAGGGAGACTCTTAT      |
| chi-miR-1197-3p | 22 | TAGGACACATGGTCTACTTCT       |
| chi-miR-133a-5p | 22 | AGCTGGTAAAATGGAACCAAAT      |
| chi-miR-134     | 22 | TGTGACTGGTTGACCAGAGGGG      |
| chi-miR-204-3p  | 22 | GCTGGGAAGGCAAAGGGAC         |
| chi-miR-2411-5p | 22 | GTGGAGTGAAGTGCAGATGCAGCCAGC |
| chi-miR-323a-3p | 22 | CACATTACACGGTTCGACCTCT      |
| chi-miR-147-3p  | 21 | GTGTGCGGAAATGCTTCT          |
| chi-miR-25-5p   | 21 | AGGCGGAGACTTGGGCAATTGCT     |
| chi-miR-628-5p  | 21 | ATGCTGACATATTTACTAGAGGG     |
| chi-miR-17-3p   | 20 | ACTGCAGTGAAGGCACTTGTAGCA    |
| chi-miR-187     | 20 | TCGTGTCTTGTGTTGCAGCC        |
| chi-miR-223-5p  | 20 | TGTGTATTTGACAAGCTGAGTTG     |
| chi-miR-502b-3p | 20 | ATCCACCTGGGCAAGGATTCTGAA    |
| chi-miR-101-5p  | 19 | TCAGTTATCACAGTGTGATGC       |
| chi-miR-26b-3p  | 19 | CCTGTTCTCCATTAATTGGCTC      |
| chi-miR-29b-5p  | 19 | CTGGTTTCACATGGTGGCTTAGA     |
| chi-miR-1248-5p | 18 | ACCTTCTTGTATAAGCACTG        |

|                 |    |                              |
|-----------------|----|------------------------------|
| chi-miR-1306-3p | 17 | ACGTTGGCTCTGGTGGTGATGG       |
| chi-miR-182     | 17 | TTTGGCAATGGTAGAACTCAC        |
| chi-miR-196a    | 17 | TAGGTAGTTTCATGTTGTTGG        |
| chi-miR-324-5p  | 17 | CGCATCCCCTAGGGCATTGGTGT      |
| chi-miR-345-5p  | 17 | GCTGACTCCTAGTCCAGTGCT        |
| chi-miR-190a-5p | 16 | TGATATGTTTGATATATTAGGTT      |
| chi-miR-30b-3p  | 16 | CTGGGAGGTGGATGTTTACTTC       |
| chi-miR-376b-3p | 16 | ATCATAGAGGAAAATCCAT          |
| chi-miR-491-5p  | 16 | AGTGGGGAACCCTTCCATGAGG       |
| chi-miR-196b    | 15 | TAGGTAGTTTCCTGTTGTTGG        |
| chi-miR-154a-3p | 14 | AATCATACACGGTTCACCTACT       |
| chi-miR-16a-3p  | 14 | AAATTATCTCCAGTATTAAGTGTGCTGC |
| chi-miR-338-3p  | 13 | TCCAGCATCAGTGATTTTGT         |
| chi-let-7f-3p   | 12 | CTATACAATCTATTGCCTTCCC       |
| chi-miR-130b-3p | 12 | CAGTGCAATGATGAAAGGGCAT       |
| chi-miR-193b-5p | 12 | CGGGGTTTTGAGGGCGAGATGA       |
| chi-miR-301a-3p | 12 | CAGTGCAATAGTATTGTCAAAGC      |
| chi-let-7g-3p   | 11 | CTGTACAGGCCACTGCCTTGCC       |
| chi-miR-10a-3p  | 11 | CAAATTCGTATCTAGGGGAAT        |
| chi-miR-144-5p  | 11 | TGGGATATCATCATATACTGT        |
| chi-miR-15b-3p  | 11 | CGAATCATTATTTGCTGCTCT        |
| chi-miR-1814    | 11 | GTTTTGTTTGGGTTTGT            |
| chi-miR-2331    | 11 | ACCCTGCAGCCAAAGAAGCT         |
| chi-miR-487a-3p | 11 | AATCATACAGGGACATCCAGTT       |
| chi-miR-544-5p  | 11 | TCTTGTTAAAAGGCAGATTCT        |
| chi-miR-93-3p   | 11 | ACTGCTGAGCCAGCACTTCCCGA      |
| chi-miR-146b-3p | 10 | TGCCCTAGGGACTCAGTTCTGGT      |
| chi-miR-26a-3p  | 10 | CCTATTCTCGGTTACTTGCACG       |
| chi-miR-33a-3p  | 10 | CAATGTTTCCACAGTGCATCA        |
| chi-miR-342-5p  | 10 | AGGGGTGCTATCTGTGGTTGAGG      |
| chi-miR-3959-3p | 10 | TGTATGTCAACTGATCCACAGT       |
| chi-miR-1271-3p | 9  | AGTGCCTGCTATGTGCCAGG         |
| chi-miR-183     | 9  | TATGGCACTGGTAGAATTCCT        |
| chi-miR-20a-3p  | 9  | ACTGCATTATGAGCACTTAAA        |
| chi-miR-376d    | 9  | ATCATAGAGGAAAATCCACAT        |
| chi-miR-502b-5p | 9  | TAATCTTGCTCCCCAGGTGAG        |
| chi-miR-105a    | 8  | TCAAATGCTCAGACTCCTGTGG       |
| chi-miR-106a-5p | 8  | AAAAGTGCTTACAGTGCAGGTAGC     |
| chi-miR-18a-3p  | 8  | ACTGCCCTAAGTGCTCCTTCTGG      |
| chi-miR-2332    | 8  | CGGTTAAGGTCTTGGAGACAAAG      |
| chi-miR-324-3p  | 8  | ACTGCCCCAGGTGCTGCTGGG        |
| chi-miR-338-5p  | 8  | AACAATATCCTGGTGCTGAGT        |
| chi-miR-34b-3p  | 8  | AATCACTAGTTCCTACTGCCATC      |

|                 |   |                                |
|-----------------|---|--------------------------------|
| chi-miR-767     | 8 | TGCACCATGGTTGTCTGAGCAT         |
| chi-miR-16b-3p  | 7 | ACCAATATTATTGTGCTGCTTT         |
| chi-miR-3432-3p | 7 | CAGCAACTAAAGATCCCTCAGG         |
| chi-miR-380-5p  | 7 | ATGGTTGACCACAGAACATGCGC        |
| chi-miR-429     | 7 | TAATACTGTCTGGTAATGCCG          |
| chi-miR-135b-5p | 6 | TATGGCTTTTCATTCTATGTGA         |
| chi-miR-192-3p  | 6 | CTGCCAATTCCATAGGTCACAGG        |
| chi-miR-217-5p  | 6 | TACTGCATCAGGAACTGATTGGA        |
| chi-miR-329a-3p | 6 | AACACACCTGGTTAACCTTT           |
| chi-miR-376a    | 6 | GTAGATTCTCCTTCTATGAGT          |
| chi-miR-92a-5p  | 6 | AGGTTGGGATCAGTTGCAATGCT        |
| chi-miR-656     | 5 | AATATTATACAGTCAACCTCT          |
| chi-miR-9-3p    | 5 | ATAAAGCTAGATAACCGAAA           |
| chi-miR-98-3p   | 5 | CTATACAACTTACTACTTTCCC         |
| chi-miR-1185-5p | 4 | AGAGGATACCCTTTGTATGT           |
| chi-miR-141     | 4 | TAACACTGTCTGGTAAAGATGG         |
| chi-miR-190b    | 4 | TGATATGTTTGATATTGGGTTG         |
| chi-miR-376b-5p | 4 | GGTGGATATTCCTTCTATGTTT         |
| chi-miR-376c-5p | 4 | GGTGGATATTCCTTCTATGTTT         |
| chi-miR-376e-5p | 4 | GGTGGATATTCCTTCTATGTTT         |
| chi-miR-100-3p  | 3 | CAAGCTTGTGTCTATAGGTAT          |
| chi-miR-128-5p  | 3 | CGGGGCCGTAGCACTGTCTGAGA        |
| chi-miR-147-5p  | 3 | TGGAAACACTTCTGCACAAACT         |
| chi-miR-181b-3p | 3 | CTCACTGATCAATGAATGCAA          |
| chi-miR-184     | 3 | TGGACGGAGAACTGATAAGGGT         |
| chi-miR-186-3p  | 3 | CCCAAAGGTGAATTTTTTGG           |
| chi-miR-2335    | 3 | GATAATGATGACTAACTGAAT          |
| chi-miR-2404    | 3 | TTGCACTGCATGGTATCTG            |
| chi-miR-412-3p  | 3 | ACTTCACCTGGTCCACTAGCT          |
| chi-miR-449a-5p | 3 | TGGCAGTGTATTGTTAGCTGG          |
| chi-miR-545-3p  | 3 | TCAACAACATTTATTGTGTGC          |
| chi-miR-103-5p  | 2 | AGCTTCTTTACAGTGCTGCCTTGTAGCATT |
| chi-miR-105b-3p | 2 | CCACGGATGTTTGAGCATGTGC         |
| chi-miR-19b-5p  | 2 | AGTTTTGCAGGTTTGCATCCAGC        |
| chi-miR-216b    | 2 | AAATCTCTGCAGGCAAATGTGAT        |
| chi-miR-224-3p  | 2 | AAATGGTACCCTAGTGACTACA         |
| chi-miR-2432    | 2 | AGGATTCTAGGCTTAGAGGT           |
| chi-miR-33b-5p  | 2 | GTGCATTGCTGTTGCATTG            |
| chi-miR-346-5p  | 2 | TGTCTGCCCGCATGCCTGCCTCT        |
| chi-miR-411b-3p | 2 | TATGTCACATGGTCCACTAAT          |
| chi-miR-454-5p  | 2 | ACCCTATCGATATTGTCTCTG          |
| chi-miR-499-3p  | 2 | GAACATCACAGCAAGTCTGTGC         |
| chi-miR-502a    | 2 | ATGCACCTGGACAAGGATTC           |

|                 |   |                         |
|-----------------|---|-------------------------|
| chi-miR-874-5p  | 2 | CGGCCCCACGCACCAGGGTAAGA |
| chi-miR-96      | 2 | TTTGGCACTAGCACATTTTTG   |
| chi-miR-105b-5p | 1 | TCAAATGCTCAGACTCCTTGGTG |
| chi-miR-1224    | 1 | GTGAGGACTCGGGAGGTGGAGG  |
| chi-miR-154b-3p | 1 | ATCATACATGGTTGACCTTTTTT |
| chi-miR-1839    | 1 | AAGGTAGACAGAACAGGTCTTG  |
| chi-miR-18b-5p  | 1 | TAAGGTGCATCTAGTGCAAG    |
| chi-miR-190a-3p | 1 | CTATATATCAAACATATTCCT   |
| chi-miR-197-5p  | 1 | TCTGTGCTCCGGGGGCTGTGC   |
| chi-miR-23b-5p  | 1 | TGGGTTCCCTGGCATGCTGATTT |
| chi-miR-326-5p  | 1 | CCTCGTCTGTCTGTTGGGCT    |
| chi-miR-34c-3p  | 1 | AATCACTAACCACACGGCCAGG  |
| chi-miR-377     | 1 | AATCACACAAAGGCAACTTTTG  |
| chi-miR-3955-3p | 1 | TGGGATTTTAGTCCATCATAGAG |
| chi-miR-545-5p  | 1 | CTCAGTAAATGTTTATTGGAT   |

### Supplementary Table S3

Novel miRNAs in the ovaries of Tibetan goat (a) and Jintang black goat (b) during follicular phase

#### (a) Non-prolific Tibetan goats

| miR_Name     | Counts | Sequence                 |
|--------------|--------|--------------------------|
| novel-miR-8  | 6803   | AACATTCAACGCTGTCGGTGAGT  |
| novel-miR-93 | 2701   | AACTGTTTGCAGAGGAAACTGA   |
| novel-miR-20 | 2827   | TCCCTGAGACCCTAACTTGTGAT  |
| novel-miR-94 | 2352   | TGAGGTAGTAGATTGTATAGTTT  |
| novel-miR-77 | 2160   | TACAGTACTGTGATAACTGAAGA  |
| novel-miR-72 | 1162   | AGGCAAGATGCTGGCATAGCTGT  |
| novel-miR-81 | 829    | TAGCAGCGGGAACAGTACTGCAG  |
| novel-miR-78 | 532    | TATTGCACATTACTAAGTTGCA   |
| novel-miR-70 | 412    | TGAGATGAAGCACTGTAGCTC    |
| novel-miR-37 | 161    | GCCTGCTGGGGTGGAACCTGGT   |
| novel-miR-83 | 242    | AGAGGTAAAAAATTGATTTGACT  |
| novel-miR-91 | 249    | TGATTGGTACTTCTTAGAGTGA   |
| novel-miR-27 | 196    | TGAGACCTCCGGGTTCTGAGCT   |
| novel-miR-68 | 163    | GTGCCTACTGAGCTGAAACACA   |
| novel-miR-38 | 62     | TATGTGGGACGGTAAACCGCTT   |
| novel-miR-36 | 158    | GAGAGATCAGAGGCGCAGAGT    |
| novel-miR-12 | 137    | TGTTGTACTTTTTTTTTTTGTTT  |
| novel-miR-52 | 159    | TGTAACAGCAACTCCATGTGGAA  |
| novel-miR-71 | 108    | GTCCAGTTTTCCCAGGAATCCCT  |
| novel-miR-92 | 105    | ATTGGCACGTCTTGGAATGCA    |
| novel-miR-66 | 65     | TCTGGTGCTTAGACTCTGTGCT   |
| novel-miR-76 | 70     | TGAGGTAGTAGATTGTATAGTT   |
| novel-miR-56 | 41     | AACTTTTGCCCCTAGTAACGGACT |
| novel-miR-75 | 44     | TGAGGTAGTAGGTTGTATAGTTTT |
| novel-miR-62 | 56     | ATGTCCGCGGGTCCCTATCCC    |
| novel-miR-14 | 57     | TTCTCTGTTTCATGTGGACGTGT  |
| novel-miR-64 | 43     | TGAGGTAGTAGTTTGTGCTGTT   |
| novel-miR-55 | 57     | GTACAGTACTGTGATAACTGA    |
| novel-miR-9  | 47     | GTTTCCGGTCGCTGTGCTCTCG   |
| novel-miR-45 | 45     | TGAGGTAGTAGTTTGTACAGTT   |
| novel-miR-43 | 28     | TCACAGTGAACCGGTCTCTTTC   |
| novel-miR-21 | 32     | TGAGGTAGTAGGTTGTATAGTT   |
| novel-miR-13 | 29     | GAAAGGTTTCATTTGGGTTTTT   |
| novel-miR-15 | 20     | TTGCAGTGATGACTTGAGTCTG   |
| novel-miR-31 | 23     | ATCATGTATGATACTGCAAACA   |

|              |     |                          |
|--------------|-----|--------------------------|
| novel-miR-41 | 17  | TTGGACACTTCAGTACTGCTACA  |
| novel-miR-67 | 12  | TGCCCCGAGGCTTGTGAAGCTC   |
| novel-miR-24 | 18  | AAAACCTCTGAATGAACTTTATG  |
| novel-miR-35 | 25  | TGAGGTAGTAGGTTGTATGGTT   |
| novel-miR-48 | 11  | TGGAAGGCCTGGCTTTCAGCGT   |
| novel-miR-65 | 21  | TGAGGTAGTAGGTTGTGTGGTT   |
| novel-miR-46 | 9   | CTTAGAGCTTCCCCGCCTGGGGA  |
| novel-miR-69 | 22  | CTCTGCCCGCTCTCTGTCTTACA  |
| novel-miR-53 | 7   | AAAACCTGAATGAACTTTGAG    |
| novel-miR-51 | 15  | AAAACCTGAGTGAACCTTCTAG   |
| novel-miR-39 | 14  | CATCTGGTTGGTATGTTTTGCT   |
| novel-miR-33 | 15  | GCGGCCCGCGGGCTCGGATGCT   |
| novel-miR-40 | 11  | AAACCGACATGAACTTTTTGG    |
| novel-miR-79 | 10  | TGTTTGACATGAGAGCTTCCAGA  |
| novel-miR-74 | 8   | TGGCTCAGTTCAGCAGGAAC     |
| novel-miR-11 | 21  | GAAAACCTGAATGAACTTTTG    |
| novel-miR-80 | 10  | TTTAAGTACACGATGAACTGC    |
| novel-miR-50 | 8   | AAACCCGAATGAACTTTTTGA    |
| novel-miR-6  | 10  | AAAAACCTGAATGAACCTTTTG   |
| novel-miR-61 | 8   | CCTCATGTGGAATCTTTAGTTG   |
| novel-miR-49 | 10  | TAGAGAAGCACTGGGGGAAAGT   |
| novel-miR-89 | 8   | TGATTGGCATTCTTAGAGTGA    |
| novel-miR-4  | 6   | TCTCAGGGTCTGTGAGCTCCTCG  |
| novel-miR-16 | 6   | TGGAATGTAAAGAAGTATGTAT   |
| novel-miR-17 | 6   | GCCCTGTCCTCCAGGAGCTC     |
| novel-miR-7  | 7   | AGGCCAAAGCAAACGACTGTGC   |
| novel-miR-84 | 134 | AATCGGTATCTGTCTGAGTAGA   |
| novel-miR-90 | 57  | AGTAGTGCCTCTCTGAGTGT     |
| novel-miR-58 | 56  | CCTATTCTTGATTACTTGTTT    |
| novel-miR-63 | 56  | TAGGTAGTTTCATGTTGTTGGGA  |
| novel-miR-32 | 25  | ATCTGAATCAGTCTATGTTGACT  |
| novel-miR-57 | 24  | TCCGGGGAAAGCAGGAGTGAG    |
| novel-miR-87 | 21  | TGAAAGGACCTGCCTGGGTAGA   |
| novel-miR-3  | 21  | CCCAGGGATGTAGCTCCTAGT    |
| novel-miR-18 | 17  | TGTAAACATCCTCGACTGGAAGCT |
| novel-miR-88 | 15  | TTCACAAGAAGGTGTCATTCA    |
| novel-miR-30 | 13  | GAAAACCTGAACAACTTTGTG    |
| novel-miR-34 | 13  | TTCTCATTGGCCTCACGTCCTGT  |
| novel-miR-28 | 12  | TAGATCTTTACCTATTAGCA     |
| novel-miR-54 | 12  | ATTGTCCTTGCTGTTTGGAGAT   |
| novel-miR-2  | 11  | ACCGGGGACTGTGGAGACGGA    |
| novel-miR-42 | 11  | TCACTGGGCATCCTCTGCTTTA   |
| novel-miR-29 | 12  | TTAATTTTTGCAAGGCTTTTC    |

|              |   |                         |
|--------------|---|-------------------------|
| novel-miR-82 | 9 | TACGGGGATAGGTCTCAAGA    |
| novel-miR-47 | 9 | ACCCTGTCCTCCAGGAGCTC    |
| novel-miR-10 | 9 | TTGAGGCTCCGAGCTTTGGTGT  |
| novel-miR-25 | 9 | TTTCTTTGAGCTTCTTTCTTTC  |
| novel-miR-73 | 9 | TGAGTGTGTGTGTGGGAGTGT   |
| novel-miR-85 | 8 | TACTGTGCCACGGATGGGTAGC  |
| novel-miR-5  | 8 | ACTGGGCAATCCTTTCACTCT   |
| novel-miR-19 | 7 | TCAAGGTCCGCTGTGAACACGG  |
| novel-miR-59 | 7 | CTCACTGATGAGCAGCTTCTGAC |
| novel-miR-26 | 6 | GATGAGGCTCAGCGAGCCCTGGT |
| novel-miR-23 | 6 | CAGCACTGTCCGGTAAGATGT   |
| novel-miR-22 | 6 | ATCGTTACCAGACAGTGTTAGA  |
| novel-miR-1  | 6 | ACATCTCTGGGGAATTGCTGAGT |
| novel-miR-60 | 6 | TGTAGGGATGGAAGCCATGAA   |
| novel-miR-86 | 5 | TGCCTAGAGAGGTTCTGTTTACT |
| novel-miR-44 | 5 | CCAGGAGTGTCTTTGGATTGTC  |

**(b) Prolific Jintang black goats**

| miR_Name     | Counts | Sequence                 |
|--------------|--------|--------------------------|
| novel-miR-8  | 9244   | AACATTCAACGCTGTCGGTGAGT  |
| novel-miR-93 | 3121   | AACTGTTTGAGAGGAAACTGA    |
| novel-miR-20 | 2785   | TCCCTGAGACCCTAACTTGTGAT  |
| novel-miR-94 | 2397   | TGAGGTAGTAGATTGTATAGTTT  |
| novel-miR-77 | 2336   | TACAGTACTGTGATAACTGAAGA  |
| novel-miR-72 | 1001   | AGGCAAGATGCTGGCATAGCTGT  |
| novel-miR-81 | 386    | TAGCAGCGGGAACAGTACTGCAG  |
| novel-miR-78 | 529    | TATTGCACATTACTAAGTTGCA   |
| novel-miR-70 | 417    | TGAGATGAAGCACTGTAGCTC    |
| novel-miR-37 | 491    | GCCTGCTGGGGTGGAACCTGGT   |
| novel-miR-83 | 266    | AGAGGTAAAAAATTGATTGACT   |
| novel-miR-91 | 187    | TGATTGGTACTTCTTAGAGTGA   |
| novel-miR-27 | 204    | TGAGACCTCCGGGTTCTGAGCT   |
| novel-miR-68 | 225    | GTGCCTACTGAGCTGAAACACA   |
| novel-miR-38 | 312    | TATGTGGGACGGTAAACCGCTT   |
| novel-miR-36 | 176    | GAGAGATCAGAGGCGCAGAGT    |
| novel-miR-12 | 190    | TGTTGTACTTTTTTTTTTGTTC   |
| novel-miR-52 | 132    | TGTAACAGCAACTCCATGTGGAA  |
| novel-miR-71 | 134    | GTCCAGTTTTCCCAGGAATCCCT  |
| novel-miR-92 | 40     | ATTGGCACGTCTTGAATGCA     |
| novel-miR-66 | 71     | TCTGGTGCTTAGACTCTGTGCT   |
| novel-miR-76 | 60     | TGAGGTAGTAGATTGTATAGTT   |
| novel-miR-56 | 82     | AACTTTTGCCCCTAGTAACGGACT |
| novel-miR-75 | 73     | TGAGGTAGTAGGTTGTATAGTTT  |



|               |    |                         |
|---------------|----|-------------------------|
| novel-miR-62  | 57 | ATGTCCGCGGGTCCCTATCCC   |
| novel-miR-14  | 48 | TTCTCTGTTTCATGTGGACGTGT |
| novel-miR-64  | 61 | TGAGGTAGTAGTTTGTGCTGTT  |
| novel-miR-55  | 46 | GTACAGTACTGTGATAACTGA   |
| novel-miR-9   | 52 | GTTTCCGGTCGCTGTGCTCTCG  |
| novel-miR-45  | 41 | TGAGGTAGTAGTTTGTACAGTT  |
| novel-miR-43  | 42 | TCACAGTGAACCGGTCTCTTTC  |
| novel-miR-21  | 37 | TGAGGTAGTAGGTTGTATAGTT  |
| novel-miR-13  | 31 | GAAAGGTTTCATTTGGGTTTTT  |
| novel-miR-15  | 30 | TTGCAGTGATGACTTGAGTCTG  |
| novel-miR-31  | 24 | ATCATGTATGATACTGCAAACA  |
| novel-miR-41  | 29 | TTGGACACTTCAGTACTGCTACA |
| novel-miR-67  | 32 | TGCCCCGAGGCTTGTGAAGCTC  |
| novel-miR-24  | 25 | AAAACCTCTGAATGAACTTTATG |
| novel-miR-35  | 16 | TGAGGTAGTAGGTTGTATGGTT  |
| novel-miR-48  | 29 | TGGAAGGCCTGGCTTTCAGCGT  |
| novel-miR-65  | 18 | TGAGGTAGTAGGTTGTGTGGTT  |
| novel-miR-46  | 30 | CTTAGAGCTTCCCCGCCTGGGGA |
| novel-miR-69  | 13 | CTCTGCCCGCTCTCTGTCTTACA |
| novel-miR-53  | 41 | AAAACCTGAATGAACTTTTGAG  |
| novel-miR-51  | 14 | AAAACCTGAGTGAACCTTCTAG  |
| novel-miR-39  | 14 | CATCTGGTTGGTATGTTTTGCT  |
| novel-miR-33  | 12 | GCGGCCCGCGGGCTCGGATGCT  |
| novel-miR-40  | 12 | AAACCGACATGAACTTTTTGG   |
| novel-miR-79  | 12 | TGTTTGACATGAGAGCTTCCAGA |
| novel-miR-74  | 14 | TGGCTCAGTTCAGCAGGAAC    |
| novel-miR-11  | 11 | GAAAACCTGAATGAACTTTTG   |
| novel-miR-80  | 10 | TTAAGTACACGATGAACTGC    |
| novel-miR-50  | 13 | AAACCCGAATGAACTTTTTGA   |
| novel-miR-6   | 9  | AAAAACCTGAATGAACCTTTTG  |
| novel-miR-61  | 10 | CCTCATGTGGAATCTTTAGTTG  |
| novel-miR-49  | 8  | TAGAGAAGCACTGGGGGAAAGT  |
| novel-miR-89  | 8  | TGATTGGCATTCTTAGAGTGA   |
| novel-miR-4   | 9  | TCTCAGGGTCTGTGAGCTCCTCG |
| novel-miR-16  | 8  | TGGAATGTAAAGAAGTATGTAT  |
| novel-miR-17  | 8  | GCCCTGTCTCCAGGAGCTC     |
| novel-miR-7   | 6  | AGGCCAAAGCAAACGACTGTGC  |
| novel-miR-131 | 47 | CCTATTCTTGATTACTTGTTTC  |
| novel-miR-141 | 43 | TGAGTAGTGCTCTCTGAGTGT   |
| novel-miR-121 | 40 | ATTGTTCTCCAACCTGGCTCTTT |
| novel-miR-114 | 39 | TCACTGGGCATCCTCTGCTTT   |
| novel-miR-127 | 28 | ATTGTCCTTGCTGTTTGGAGA   |
| novel-miR-95  | 26 | CCCAGGGATGTAGCTCCTAGTGC |

|               |    |                          |
|---------------|----|--------------------------|
| novel-miR-107 | 24 | TTTGCAGTAACAGGTGTGAAC    |
| novel-miR-118 | 22 | TAGCCAGTTGGGGAAGAATGC    |
| novel-miR-134 | 22 | TTTTCAGTGATTTCAGCTCTAAGT |
| novel-miR-99  | 20 | TGTAAACATCCTCGACTGGAAGC  |
| novel-miR-132 | 16 | CCTCACTGATGAGCAGCTTCTGAC |
| novel-miR-116 | 16 | CTGCAGTGATGCCGCATCTGAGC  |
| novel-miR-129 | 16 | GAAGAATCTGAATGAACATTT    |
| novel-miR-101 | 15 | TTCTTGACTGCTCACCTGGGCT   |
| novel-miR-105 | 14 | TAATTTTTGCAAGGCTTTTCC    |
| novel-miR-111 | 12 | AACAGCGTGGATTTTCAGTTGGCT |
| novel-miR-113 | 12 | CTCGGAGAGTGGAGCTGTGGGTGT |
| novel-miR-123 | 11 | ACCCTGTCCTCCAGGAGCTCA    |
| novel-miR-108 | 10 | TCTGAATCAGTCTATGTTGACT   |
| novel-miR-97  | 10 | TGCCAAGCCCACGTTCAAAG     |
| novel-miR-140 | 10 | AATGGTGCTTTTTTGTGAAGA    |
| novel-miR-112 | 9  | CAGTTTGCTCGGGCTTTTCTGT   |
| novel-miR-135 | 9  | AAAACCTGAACTAACTTTTTGA   |
| novel-miR-106 | 9  | GAAAACCTGAACAACTTTGT     |
| novel-miR-109 | 9  | TTCTCATTGGCCTCACGTCCTG   |
| novel-miR-104 | 9  | TCCTCACTGTCTCTGCTCTGCAG  |
| novel-miR-102 | 8  | TTTCTTTGAGCTTCTTTCTTT    |
| novel-miR-115 | 8  | GTAGGGACCTCTCATGTCTGTG   |
| novel-miR-137 | 8  | GAAAAGTTCGTTTGGGTTTTCC   |
| novel-miR-103 | 8  | TGAGGTAGGAGGTTGTATAGTT   |
| novel-miR-126 | 8  | TACCCTGTAGAACCGAATTTGT   |
| novel-miR-138 | 7  | TGGTGCTCCCTGGAGCTGAGC    |
| novel-miR-136 | 7  | TTGCCTCCCGGAGGGCTGGAGC   |
| novel-miR-98  | 7  | AGCAGCATTGTACAGGGCTATGA  |
| novel-miR-142 | 7  | TGAGGTAGTAAGTTGTATTGTT   |
| novel-miR-130 | 7  | TGTAAACATCCTTGACTGGAAGCT |
| novel-miR-133 | 7  | TAAAAGTTTGGTTGGGTTTTT    |
| novel-miR-120 | 7  | TGGTTTCAGGACAGATCTCTCC   |
| novel-miR-117 | 7  | CTGGTTTCAGGACAGATCTCT    |
| novel-miR-119 | 6  | TACGCCGGGAGCTCGCAGCG     |
| novel-miR-122 | 5  | AAACTTGAATGAACTTTCTGGCA  |
| novel-miR-96  | 5  | GAAAACCAAACGAACCTTATG    |
| novel-miR-125 | 5  | TCTGAACGAACTTTGTGGCAA    |
| novel-miR-110 | 5  | GTAAACCTGAATGAACTTTTTG   |
| novel-miR-139 | 5  | TGTGACAGATTGATAACTGA     |
| novel-miR-124 | 5  | TCCCCATGTGTCTCCTCGCCC    |
| novel-miR-128 | 5  | AAAACCTGAATGAACTTTTA     |
| novel-miR-100 | 5  | AAACCAAATGAACTTCTTTGC    |

**Supplementary Table S4**

Differential expression of miRNAs in the ovaries of Tibetan goat (TBG) and Jintang black goat (JTG) during follicular phase

| miR_name        | TBG    | JTG    | log2 ratio (JTG/TBG)<br>normalized | p-value | q-value |
|-----------------|--------|--------|------------------------------------|---------|---------|
| chi-miR-21-5p   | 158549 | 788052 | 2.179                              | 0.000   | 0.000   |
| chi-miR-379-5p  | 1201   | 4338   | 1.719                              | 0.000   | 0.000   |
| chi-miR-127-3p  | 3178   | 11169  | 1.679                              | 0.000   | 0.000   |
| chi-miR-199b-5p | 6238   | 19222  | 1.490                              | 0.000   | 0.000   |
| chi-miR-199c-5p | 6238   | 19222  | 1.490                              | 0.000   | 0.000   |
| chi-miR-200a    | 2275   | 303    | -3.043                             | 0.000   | 0.000   |
| chi-miR-200b    | 1626   | 225    | -2.987                             | 0.000   | 0.000   |
| chi-miR-204-5p  | 3139   | 1397   | -1.302                             | 0.000   | 0.000   |
| chi-miR-411a-5p | 1140   | 3020   | 1.271                              | 0.000   | 0.000   |
| chi-miR-493-5p  | 135    | 741    | 2.322                              | 0.000   | 0.000   |
| chi-miR-409-3p  | 203    | 873    | 1.970                              | 0.000   | 0.000   |
| chi-miR-196b    | 298    | 15     | -4.446                             | 0.000   | 0.000   |
| chi-miR-483     | 407    | 66     | -2.759                             | 0.000   | 0.000   |
| chi-miR-150     | 657    | 1467   | 1.025                              | 0.000   | 0.000   |
| chi-miR-424-3p  | 988    | 462    | -1.231                             | 0.000   | 0.000   |
| chi-miR-493-3p  | 69     | 413    | 2.447                              | 0.000   | 0.000   |
| chi-miR-494     | 84     | 440    | 2.255                              | 0.000   | 0.000   |
| chi-miR-3958-3p | 150    | 576    | 1.807                              | 0.000   | 0.000   |
| novel-miR-81    | 829    | 386    | -1.293                             | 0.000   | 0.000   |
| chi-miR-136-3p  | 319    | 877    | 1.325                              | 0.000   | 0.000   |
| chi-miR-381     | 23     | 251    | 3.314                              | 0.000   | 0.000   |
| chi-miR-382-3p  | 120    | 451    | 1.776                              | 0.000   | 0.000   |
| novel-miR-38    | 62     | 312    | 2.141                              | 0.000   | 0.000   |
| chi-miR-136-5p  | 207    | 574    | 1.337                              | 0.000   | 0.000   |
| chi-miR-181d    | 330    | 105    | -1.786                             | 0.000   | 0.000   |
| chi-miR-3959-5p | 111    | 384    | 1.657                              | 0.000   | 0.000   |
| novel-mir-37    | 161    | 491    | 1.418                              | 0.000   | 0.000   |
| novel-mir-84    | 134    | 0      | -8.257                             | 0.000   | 0.000   |
| chi-miR-592     | 357    | 142    | -1.464                             | 0.000   | 0.000   |
| chi-miR-409-5p  | 60     | 243    | 1.884                              | 0.000   | 0.000   |
| chi-miR-127-5p  | 91     | 298    | 1.577                              | 0.000   | 0.000   |
| chi-miR-504     | 335    | 143    | -1.362                             | 0.000   | 0.000   |
| chi-miR-135a    | 223    | 75     | -1.706                             | 0.000   | 0.000   |
| chi-miR-196a    | 114    | 17     | -2.880                             | 0.000   | 0.000   |
| chi-miR-432-5p  | 59     | 220    | 1.765                              | 0.000   | 0.000   |
| chi-miR-382-5p  | 32     | 163    | 2.215                              | 0.000   | 0.000   |

|                 |     |     |        |       |       |
|-----------------|-----|-----|--------|-------|-------|
| chi-miR-411a-3p | 48  | 178 | 1.757  | 0.000 | 0.000 |
| chi-miR-380-3p  | 58  | 197 | 1.630  | 0.000 | 0.000 |
| chi-miR-495-3p  | 140 | 339 | 1.142  | 0.000 | 0.000 |
| chi-miR-369-3p  | 79  | 235 | 1.439  | 0.000 | 0.000 |
| chi-miR-130b-5p | 44  | 162 | 1.746  | 0.000 | 0.000 |
| chi-miR-767     | 71  | 8   | -3.284 | 0.000 | 0.000 |
| novel-miR-90    | 57  | 0   | -7.024 | 0.000 | 0.000 |
| novel-miR-58    | 56  | 0   | -6.998 | 0.000 | 0.000 |
| novel-miR-63    | 56  | 0   | -6.998 | 0.000 | 0.000 |
| chi-miR-497-3p  | 2   | 56  | 4.673  | 0.000 | 0.000 |
| chi-miR-34c-5p  | 185 | 78  | -1.380 | 0.000 | 0.000 |
| chi-miR-412-5p  | 42  | 144 | 1.644  | 0.000 | 0.000 |
| chi-miR-429     | 57  | 7   | -3.160 | 0.000 | 0.000 |
| novel-miR-131   | 0   | 47  | 6.364  | 0.000 | 0.000 |
| chi-miR-1249    | 109 | 38  | -1.654 | 0.000 | 0.000 |
| novel-miR-141   | 0   | 43  | 6.236  | 0.000 | 0.000 |
| chi-miR-655     | 23  | 94  | 1.897  | 0.000 | 0.000 |
| chi-miR-487b-3p | 39  | 124 | 1.535  | 0.000 | 0.000 |
| novel-miR-121   | 0   | 40  | 6.131  | 0.000 | 0.000 |
| novel-miR-114   | 0   | 39  | 6.095  | 0.000 | 0.000 |
| chi-miR-433     | 19  | 83  | 1.993  | 0.000 | 0.000 |
| novel-miR-92    | 105 | 40  | -1.583 | 0.000 | 0.000 |
| chi-miR-21-3p   | 6   | 50  | 2.925  | 0.000 | 0.000 |
| chi-miR-153     | 79  | 25  | -1.794 | 0.000 | 0.000 |
| chi-miR-105a    | 46  | 8   | -2.658 | 0.000 | 0.000 |
| chi-miR-223-3p  | 19  | 75  | 1.847  | 0.000 | 0.000 |
| chi-miR-2318    | 2   | 32  | 3.866  | 0.000 | 0.000 |
| chi-miR-204-3p  | 67  | 22  | -1.741 | 0.000 | 0.000 |
| novel-miR-32    | 25  | 0   | -5.834 | 0.000 | 0.000 |
| novel-miR-127   | 0   | 28  | 5.617  | 0.000 | 0.000 |
| novel-miR-57    | 24  | 0   | -5.776 | 0.000 | 0.000 |
| chi-miR-369-5p  | 14  | 59  | 1.941  | 0.000 | 0.000 |
| novel-miR-95    | 0   | 26  | 5.510  | 0.000 | 0.000 |
| chi-miR-3955-5p | 10  | 49  | 2.159  | 0.000 | 0.000 |
| chi-miR-181c-5p | 68  | 25  | -1.578 | 0.000 | 0.000 |
| novel-miR-107   | 0   | 24  | 5.394  | 0.000 | 0.000 |
| novel-miR-3     | 21  | 0   | -5.583 | 0.000 | 0.000 |
| novel-miR-87    | 21  | 0   | -5.583 | 0.000 | 0.000 |
| chi-miR-450-3p  | 82  | 36  | -1.322 | 0.000 | 0.000 |
| novel-miR-53    | 7   | 41  | 2.360  | 0.000 | 0.000 |
| novel-miR-118   | 0   | 22  | 5.269  | 0.000 | 0.000 |
| novel-miR-134   | 0   | 22  | 5.269  | 0.000 | 0.000 |
| chi-miR-27a-5p  | 31  | 84  | 1.304  | 0.000 | 0.000 |

|                 |    |     |        |       |       |
|-----------------|----|-----|--------|-------|-------|
| chi-miR-379-3p  | 20 | 64  | 1.544  | 0.000 | 0.000 |
| novel-miR-99    | 0  | 20  | 5.131  | 0.000 | 0.000 |
| chi-miR-543-3p  | 49 | 111 | 1.046  | 0.000 | 0.000 |
| chi-miR-154b-5p | 16 | 55  | 1.647  | 0.000 | 0.000 |
| chi-miR-200c    | 73 | 33  | -1.280 | 0.000 | 0.000 |
| chi-miR-181c-3p | 67 | 29  | -1.342 | 0.000 | 0.000 |
| novel-miR-18    | 17 | 0   | -5.278 | 0.000 | 0.000 |
| chi-miR-485-3p  | 3  | 26  | 2.981  | 0.000 | 0.000 |
| chi-miR-758     | 19 | 60  | 1.525  | 0.000 | 0.000 |
| chi-miR-1197-3p | 2  | 22  | 3.325  | 0.000 | 0.000 |
| chi-miR-134     | 2  | 22  | 3.325  | 0.000 | 0.000 |
| novel-miR-88    | 15 | 0   | -5.098 | 0.000 | 0.000 |
| chi-miR-411b-5p | 32 | 78  | 1.151  | 0.000 | 0.000 |
| novel-miR-116   | 0  | 16  | 4.809  | 0.000 | 0.000 |
| novel-miR-129   | 0  | 16  | 4.809  | 0.000 | 0.000 |
| novel-miR-132   | 0  | 16  | 4.809  | 0.000 | 0.000 |
| chi-miR-374b-3p | 82 | 44  | -1.032 | 0.000 | 0.000 |
| chi-miR-410-3p  | 14 | 46  | 1.582  | 0.000 | 0.000 |
| chi-miR-665     | 4  | 25  | 2.510  | 0.000 | 0.000 |
| chi-miR-376c-3p | 18 | 53  | 1.424  | 0.000 | 0.000 |
| novel-miR-101   | 0  | 15  | 4.716  | 0.000 | 0.000 |
| novel-miR-30    | 13 | 0   | -4.891 | 0.000 | 0.000 |
| novel-miR-34    | 13 | 0   | -4.891 | 0.000 | 0.000 |
| chi-miR-383     | 10 | 37  | 1.753  | 0.000 | 0.000 |
| chi-miR-135b-5p | 25 | 6   | -2.193 | 0.000 | 0.000 |
| novel-miR-105   | 0  | 14  | 4.617  | 0.000 | 0.000 |
| novel-miR-28    | 12 | 0   | -4.776 | 0.000 | 0.000 |
| novel-miR-29    | 12 | 0   | -4.776 | 0.000 | 0.000 |
| novel-miR-54    | 12 | 0   | -4.776 | 0.000 | 0.000 |
| chi-miR-485-5p  | 12 | 39  | 1.566  | 0.000 | 0.000 |
| novel-miR-2     | 11 | 0   | -4.650 | 0.000 | 0.000 |
| novel-miR-42    | 11 | 0   | -4.650 | 0.000 | 0.000 |
| chi-miR-9-3p    | 21 | 5   | -2.205 | 0.001 | 0.000 |
| chi-miR-211     | 15 | 43  | 1.385  | 0.001 | 0.000 |
| novel-miR-111   | 0  | 12  | 4.394  | 0.001 | 0.001 |
| novel-miR-113   | 0  | 12  | 4.394  | 0.001 | 0.001 |
| chi-miR-1248-5p | 41 | 18  | -1.322 | 0.001 | 0.001 |
| novel-miR-123   | 0  | 11  | 4.269  | 0.001 | 0.001 |
| chi-miR-223-5p  | 4  | 20  | 2.188  | 0.001 | 0.001 |
| chi-miR-10a-3p  | 29 | 11  | -1.533 | 0.002 | 0.001 |
| chi-miR-376e-3p | 27 | 60  | 1.018  | 0.002 | 0.001 |
| novel-miR-10    | 9  | 0   | -4.361 | 0.002 | 0.001 |
| novel-miR-25    | 9  | 0   | -4.361 | 0.002 | 0.001 |

|                 |    |    |        |       |       |
|-----------------|----|----|--------|-------|-------|
| novel-miR-47    | 9  | 0  | -4.361 | 0.002 | 0.001 |
| novel-miR-73    | 9  | 0  | -4.361 | 0.002 | 0.001 |
| novel-miR-82    | 9  | 0  | -4.361 | 0.002 | 0.001 |
| novel-miR-46    | 9  | 30 | 1.546  | 0.002 | 0.001 |
| novel-miR-108   | 0  | 10 | 4.131  | 0.002 | 0.001 |
| novel-miR-140   | 0  | 10 | 4.131  | 0.002 | 0.001 |
| novel-miR-97    | 0  | 10 | 4.131  | 0.002 | 0.001 |
| chi-miR-133b    | 13 | 36 | 1.335  | 0.002 | 0.002 |
| chi-miR-338-5p  | 23 | 8  | -1.658 | 0.003 | 0.002 |
| novel-miR-5     | 8  | 0  | -4.191 | 0.004 | 0.002 |
| novel-miR-85    | 8  | 0  | -4.191 | 0.004 | 0.002 |
| novel-miR-104   | 0  | 9  | 3.979  | 0.004 | 0.002 |
| novel-miR-106   | 0  | 9  | 3.979  | 0.004 | 0.002 |
| novel-miR-109   | 0  | 9  | 3.979  | 0.004 | 0.002 |
| novel-miR-112   | 0  | 9  | 3.979  | 0.004 | 0.002 |
| novel-miR-135   | 0  | 9  | 3.979  | 0.004 | 0.002 |
| novel-miR-19    | 7  | 0  | -3.998 | 0.007 | 0.004 |
| novel-miR-59    | 7  | 0  | -3.998 | 0.007 | 0.004 |
| novel-miR-102   | 0  | 8  | 3.809  | 0.008 | 0.004 |
| novel-miR-103   | 0  | 8  | 3.809  | 0.008 | 0.004 |
| novel-miR-115   | 0  | 8  | 3.809  | 0.008 | 0.004 |
| novel-miR-126   | 0  | 8  | 3.809  | 0.008 | 0.004 |
| novel-miR-137   | 0  | 8  | 3.809  | 0.008 | 0.004 |
| novel-miR-67    | 12 | 32 | 1.224  | 0.008 | 0.004 |
| chi-miR-224-3p  | 11 | 2  | -2.594 | 0.006 | 0.004 |
| chi-miR-323b    | 16 | 38 | 1.114  | 0.007 | 0.004 |
| novel-miR-48    | 11 | 29 | 1.208  | 0.012 | 0.005 |
| novel-miR-117   | 0  | 7  | 3.617  | 0.015 | 0.006 |
| novel-miR-120   | 0  | 7  | 3.617  | 0.015 | 0.006 |
| novel-miR-130   | 0  | 7  | 3.617  | 0.015 | 0.006 |
| novel-miR-133   | 0  | 7  | 3.617  | 0.015 | 0.006 |
| novel-miR-136   | 0  | 7  | 3.617  | 0.015 | 0.006 |
| novel-miR-138   | 0  | 7  | 3.617  | 0.015 | 0.006 |
| novel-miR-142   | 0  | 7  | 3.617  | 0.015 | 0.006 |
| novel-miR-98    | 0  | 7  | 3.617  | 0.015 | 0.006 |
| novel-miR-1     | 6  | 0  | -3.776 | 0.015 | 0.006 |
| novel-miR-22    | 6  | 0  | -3.776 | 0.015 | 0.006 |
| novel-miR-23    | 6  | 0  | -3.776 | 0.015 | 0.006 |
| novel-miR-26    | 6  | 0  | -3.776 | 0.015 | 0.006 |
| novel-miR-60    | 6  | 0  | -3.776 | 0.015 | 0.006 |
| chi-miR-1185-3p | 7  | 22 | 1.518  | 0.009 | 0.006 |
| chi-miR-141     | 14 | 4  | -1.941 | 0.009 | 0.006 |
| chi-miR-376b-3p | 4  | 16 | 1.866  | 0.010 | 0.006 |

|                 |    |    |        |       |       |
|-----------------|----|----|--------|-------|-------|
| chi-miR-23b-5p  | 8  | 1  | -3.134 | 0.010 | 0.006 |
| chi-miR-582-5p  | 11 | 28 | 1.214  | 0.013 | 0.008 |
| novel-miR-119   | 0  | 6  | 3.394  | 0.028 | 0.010 |
| novel-miR-44    | 5  | 0  | -3.513 | 0.030 | 0.011 |
| novel-miR-86    | 5  | 0  | -3.513 | 0.030 | 0.011 |
| novel-miR-11    | 21 | 11 | -1.124 | 0.032 | 0.011 |
| chi-miR-154a-3p | 4  | 14 | 1.673  | 0.025 | 0.015 |
| novel-miR-100   | 0  | 5  | 3.131  | 0.053 | 0.017 |
| novel-miR-110   | 0  | 5  | 3.131  | 0.053 | 0.017 |
| novel-miR-122   | 0  | 5  | 3.131  | 0.053 | 0.017 |
| novel-miR-124   | 0  | 5  | 3.131  | 0.053 | 0.017 |
| novel-miR-125   | 0  | 5  | 3.131  | 0.053 | 0.017 |
| novel-miR-128   | 0  | 5  | 3.131  | 0.053 | 0.017 |
| novel-miR-139   | 0  | 5  | 3.131  | 0.053 | 0.017 |
| novel-miR-96    | 0  | 5  | 3.131  | 0.053 | 0.017 |
| chi-miR-380-5p  | 1  | 7  | 2.673  | 0.033 | 0.020 |
| chi-miR-338-3p  | 24 | 13 | -1.019 | 0.036 | 0.021 |
| chi-miR-376d    | 2  | 9  | 2.036  | 0.040 | 0.024 |
| chi-miR-2331    | 3  | 11 | 1.740  | 0.041 | 0.024 |
| chi-miR-34b-3p  | 17 | 8  | -1.222 | 0.041 | 0.024 |
| chi-miR-656     | 0  | 5  | 3.188  | 0.049 | 0.028 |
| chi-miR-192-3p  | 1  | 6  | 2.451  | 0.060 | 0.034 |
| chi-miR-329a-3p | 1  | 6  | 2.451  | 0.060 | 0.034 |
| chi-miR-105b-3p | 7  | 2  | -1.941 | 0.066 | 0.037 |
| chi-miR-3959-3p | 3  | 10 | 1.603  | 0.066 | 0.037 |
| chi-miR-34c-3p  | 5  | 1  | -2.456 | 0.072 | 0.040 |

### Supplementary Table S5

Target gene prediction for miRNAs from Tibetan (TBG) and Jintang black (JTG) goats

| miRNA types | Breeds | Software   | miRNA_ number | Target_gene_ number | miRNA::target_ number | Target_location_ number |
|-------------|--------|------------|---------------|---------------------|-----------------------|-------------------------|
| Known miRNA | TBG    | miRanda    | 388           | 29,491              | 1,815,017             | 2,276,364               |
|             |        | PITA       | 388           | 29,496              | 9,581,600             | 45,478,007              |
|             |        | targetscan | 388           | 29,496              | 2,749,564             | 3,860,577               |
|             |        | Result     | 388           | 29,489              | 1,807,176             | -                       |
|             | JTG    | miRanda    | 389           | 29,490              | 1,804,613             | 2,257,347               |
|             |        | PITA       | 389           | 29,496              | 9,609,012             | 45,701,734              |
|             |        | targetscan | 389           | 29,496              | 2,742,221             | 3,843,082               |
|             |        | Result     | 389           | 29,489              | 1,796,868             | -                       |
| Novel miRNA | TBG    | miRanda    | 94            | 29,275              | 452,035               | 564,625                 |
|             |        | PITA       | 94            | 29,496              | 2,370,690             | 11,633,916              |
|             |        | targetscan | 94            | 29,445              | 684,787               | 966,694                 |
|             |        | Result     | 94            | 29,260              | 449,709               | -                       |
|             | JTG    | miRanda    | 109           | 29,328              | 530,446               | 661,664                 |
|             |        | PITA       | 109           | 29,496              | 2,724,945             | 13,428,697              |
|             |        | targetscan | 109           | 29,450              | 805,088               | 1,133,346               |
|             |        | Result     | 109           | 29,314              | 527,684               | -                       |



### Supplementary Table S6

Terms from the function Ontology with p-value as good or better than 1 DEGs predicted from the novel miRNAs

| Gene Ontology term                                                                 | Cluster frequency  | Genome frequency of use | Corrected P-value |
|------------------------------------------------------------------------------------|--------------------|-------------------------|-------------------|
| transferase activity                                                               | 1685/10189, 16.5%  | 1704/10487, 16.2%       | 0.000             |
| metal ion binding                                                                  | 2025/10189, 19.9%  | 2052/10487, 19.6%       | 0.000             |
| catalytic activity                                                                 | 4596 /10189, 45.1% | 4690/10487, 44.7%       | 0.001             |
| small molecule binding                                                             | 1705/10189, 16.7%  | 1729/10487, 16.5%       | 0.009             |
| nucleotide binding                                                                 | 1612/10189, 15.8%  | 1634/10487, 15.6%       | 0.010             |
| nucleoside phosphate binding                                                       | 1612/10189, 15.8%  | 1634/10487, 15.6%       | 0.010             |
| purine nucleotide binding                                                          | 1482/10189, 14.5%  | 1502/10487, 14.3%       | 0.019             |
| ribonucleotide binding                                                             | 1478/10189, 14.5%  | 1498/10487, 14.3%       | 0.021             |
| purine ribonucleotide binding                                                      | 1478/10189, 14.5%  | 1498/10487, 14.3%       | 0.021             |
| adenyl nucleotide binding                                                          | 1118/10189, 11.0%  | 1131/10487, 10.8%       | 0.035             |
| adenyl ribonucleotide binding                                                      | 1116/10189, 11.0%  | 1129/10487, 10.8%       | 0.036             |
| carbohydrate derivative binding                                                    | 1570/10189, 15.4%  | 1593/10487, 15.2%       | 0.046             |
| transition metal ion binding                                                       | 1472/10189, 14.4%  | 1494/10487, 14.2%       | 0.116             |
| ion binding                                                                        | 2702/10189, 26.5%  | 2755/10487, 26.3%       | 0.226             |
| cation binding                                                                     | 2532/10189, 24.9%  | 2582/10487, 24.6%       | 0.457             |
| protein kinase activity                                                            | 393/10189, 3.9%    | 395/10487, 3.8%         | 0.577             |
| phosphotransferase activity, alcohol group as acceptor                             | 430/10189, 4.2%    | 433/10487, 4.1%         | 1.000             |
| hydrolase activity                                                                 | 1679/10189, 16.5%  | 1710/10487, 16.3%       | 1.000             |
| ligase activity                                                                    | 185/10189, 1.8%    | 185/10487, 1.8%         | 1.000             |
| kinase activity                                                                    | 555/10189, 5.4%    | 562/10487, 5.4%         | 1.000             |
| channel activity                                                                   | 228/10189, 2.2%    | 229/10487, 2.2%         | 1.000             |
| passive transmembrane transporter activity                                         | 228/10189, 2.2%    | 229/10487, 2.2%         | 1.000             |
| enzyme binding                                                                     | 287/10189, 2.8%    | 289/10487, 2.8%         | 1.000             |
| ion channel activity                                                               | 218/10189, 2.1%    | 219/10487, 2.1%         | 1.000             |
| substrate-specific channel activity                                                | 218/10189, 2.1%    | 219/10487, 2.1%         | 1.000             |
| binding                                                                            | 7056/10189, 69.3%  | 7244/10487, 69.1%       | 1.000             |
| transferase activity, transferring phosphorus-containing groups                    | 784/10189, 7.7%    | 797/10487, 7.6%         | 1.000             |
| hydrolase activity, acting on acid anhydrides                                      | 608/10189, 6.0%    | 617/10487, 5.9%         | 1.000             |
| hydrolase activity, acting on acid anhydrides, in phosphorus-containing anhydrides | 606/10189, 5.9%    | 615/10487, 5.9%         | 1.000             |
| pyrophosphatase activity                                                           | 602/10189, 5.9%    | 611/10487, 5.8%         | 1.000             |
| transferase activity, transferring glycosyl groups                                 | 194/10189, 1.9%    | 195/10487, 1.9%         | 1.000             |
| organic cyclic compound binding                                                    | 2985/10189, 29.3%  | 3057/10487, 29.2%       | 1.000             |

|                                                                                       |                   |                   |       |
|---------------------------------------------------------------------------------------|-------------------|-------------------|-------|
| transcription cofactor activity                                                       | 119/10189, 1.2%   | 119/10487, 1.1%   | 1.000 |
| protein serine/threonine kinase activity                                              | 116/10189, 1.1%   | 116/10487, 1.1%   | 1.000 |
| secondary active transmembrane transporter activity                                   | 116/10189, 1.1%   | 116/10487, 1.1%   | 1.000 |
| heterocyclic compound binding                                                         | 2960/10189, 29.1% | 3032/10487, 28.9% | 1.000 |
| protein dimerization activity                                                         | 113/10189, 1.1%   | 113/10487, 1.1%   | 1.000 |
| oxidoreductase activity, acting on CH-OH group of donors                              | 110/10189, 1.1%   | 110/10487, 1.0%   | 1.000 |
| coenzyme binding                                                                      | 109/10189, 1.1%   | 109/10487, 1.0%   | 1.000 |
| hydrolase activity, acting on glycosyl bonds                                          | 105/10189, 1.0%   | 105/10487, 1.0%   | 1.000 |
| transferase activity, transferring one-carbon groups                                  | 162/10189, 1.6%   | 163/10487, 1.6%   | 1.000 |
| peptidase activity                                                                    | 445/10189, 4.4%   | 452/10487, 4.3%   | 1.000 |
| transmembrane transporter activity                                                    | 612/10189, 6.0%   | 623/10487, 5.9%   | 1.000 |
| peptidase activity, acting on L-amino acid peptides                                   | 439/10189, 4.3%   | 446/10487, 4.3%   | 1.000 |
| lipid binding                                                                         | 207/10189, 2.0%   | 209/10487, 2.0%   | 1.000 |
| nucleoside-triphosphatase activity                                                    | 520/10189, 5.1%   | 529/10487, 5.0%   | 1.000 |
| methyltransferase activity                                                            | 95/10189, 0.9%    | 95/10487, 0.9%    | 1.000 |
| active transmembrane transporter activity                                             | 203/10189, 2.0%   | 205/10487, 2.0%   | 1.000 |
| kinase binding                                                                        | 91/10189, 0.9%    | 91/10487, 0.9%    | 1.000 |
| transferase activity, transferring acyl groups                                        | 196/10189, 1.9%   | 198/10487, 1.9%   | 1.000 |
| anion transmembrane transporter activity                                              | 89/10189, 0.9%    | 89/10487, 0.8%    | 1.000 |
| metal ion transmembrane transporter activity                                          | 144/10189, 1.4%   | 145/10487, 1.4%   | 1.000 |
| ligase activity, forming carbon-nitrogen bonds                                        | 87/10189, 0.9%    | 87/10487, 0.8%    | 1.000 |
| peptide receptor activity                                                             | 83/10189, 0.8%    | 83/10487, 0.8%    | 1.000 |
| lyase activity                                                                        | 137/10189, 1.3%   | 138/10487, 1.3%   | 1.000 |
| transporter activity                                                                  | 727/10189, 7.1%   | 742/10487, 7.1%   | 1.000 |
| G-protein coupled peptide receptor activity                                           | 80/10189, 0.8%    | 80/10487, 0.8%    | 1.000 |
| oxidoreductase activity, acting on the CH-OH group of donors, NAD or NADP as acceptor | 79/10189, 0.8%    | 79/10487, 0.8%    | 1.000 |
| ATPase activity                                                                       | 181/10189, 1.8%   | 183/10487, 1.7%   | 1.000 |
| protein binding transcription factor activity                                         | 130/10189, 1.3%   | 131/10487, 1.2%   | 1.000 |
| transcription factor binding transcription factor activity                            | 130/10189, 1.3%   | 131/10487, 1.2%   | 1.000 |
| ATPase activity, coupled                                                              | 177/10189, 1.7%   | 179/10487, 1.7%   | 1.000 |
| thiolester hydrolase activity                                                         | 75/10189, 0.7%    | 75/10487, 0.7%    | 1.000 |
| transferase activity, transferring acyl groups other than amino-acyl groups           | 176/10189, 1.7%   | 178/10487, 1.7%   | 1.000 |
| hydrolase activity, hydrolyzing O-glycosyl                                            | 73/10189, 0.7%    | 73/10487, 0.7%    | 1.000 |

|                                                                                                       |                 |                 |       |
|-------------------------------------------------------------------------------------------------------|-----------------|-----------------|-------|
| compounds                                                                                             |                 |                 |       |
| ion transmembrane transporter activity                                                                | 469/10189, 4.6% | 478/10487, 4.6% | 1.000 |
| cation channel activity                                                                               | 125/10189, 1.2% | 126/10487, 1.2% | 1.000 |
| molecular transducer activity                                                                         | 932/10189, 9.1% | 953/10487, 9.1% | 1.000 |
| potassium ion transmembrane transporter activity                                                      | 71/10189, 0.7%  | 71/10487, 0.7%  | 1.000 |
| cofactor binding                                                                                      | 213/10189, 2.1% | 216/10487, 2.1% | 1.000 |
| guanyl nucleotide binding                                                                             | 381/10189, 3.7% | 388/10487, 3.7% | 1.000 |
| guanyl ribonucleotide binding                                                                         | 380/10189, 3.7% | 387/10487, 3.7% | 1.000 |
| oxidoreductase activity, acting on the CH-CH group of donors                                          | 69/10189, 0.7%  | 69/10487, 0.7%  | 1.000 |
| substrate-specific transmembrane transporter activity                                                 | 538/10189, 5.3% | 549/10487, 5.2% | 1.000 |
| tubulin binding                                                                                       | 68/10189, 0.7%  | 68/10487, 0.6%  | 1.000 |
| endopeptidase activity                                                                                | 295/10189, 2.9% | 300/10487, 2.9% | 1.000 |
| UDP-glycosyltransferase activity                                                                      | 66/10189, 0.6%  | 66/10487, 0.6%  | 1.000 |
| ligand-gated ion channel activity                                                                     | 65/10189, 0.6%  | 65/10487, 0.6%  | 1.000 |
| ligand-gated channel activity                                                                         | 65/10189, 0.6%  | 65/10487, 0.6%  | 1.000 |
| potassium channel activity                                                                            | 63/10189, 0.6%  | 63/10487, 0.6%  | 1.000 |
| N-acyltransferase activity                                                                            | 61/10189, 0.6%  | 61/10487, 0.6%  | 1.000 |
| oxidoreductase activity, acting on paired donors, with incorporation or reduction of molecular oxygen | 109/10189, 1.1% | 110/10487, 1.0% | 1.000 |
| sequence-specific DNA binding                                                                         | 107/10189, 1.1% | 108/10487, 1.0% | 1.000 |
| ligase activity, forming carbon-oxygen bonds                                                          | 58/10189, 0.6%  | 58/10487, 0.6%  | 1.000 |
| ligase activity, forming aminoacyl-tRNA and related compounds                                         | 58/10189, 0.6%  | 58/10487, 0.6%  | 1.000 |
| receptor activity                                                                                     | 586/10189, 5.8% | 599/10487, 5.7% | 1.000 |
| hydrolase activity, acting on ester bonds                                                             | 466/10189, 4.6% | 476/10487, 4.5% | 1.000 |
| cytoskeletal protein binding                                                                          | 268/10189, 2.6% | 273/10487, 2.6% | 1.000 |
| nucleic acid binding transcription factor activity                                                    | 459/10189, 4.5% | 469/10487, 4.5% | 1.000 |
| aminoacyl-tRNA ligase activity                                                                        | 53/10189, 0.5%  | 53/10487, 0.5%  | 1.000 |
| phospholipid binding                                                                                  | 99/10189, 1.0%  | 100/10487, 1.0% | 1.000 |
| carbon-oxygen lyase activity                                                                          | 52/10189, 0.5%  | 52/10487, 0.5%  | 1.000 |
| dioxygenase activity                                                                                  | 52/10189, 0.5%  | 52/10487, 0.5%  | 1.000 |
| gated channel activity                                                                                | 97/10189, 1.0%  | 98/10487, 0.9%  | 1.000 |
| substrate-specific transporter activity                                                               | 638/10189, 6.3% | 653/10487, 6.2% | 1.000 |
| small conjugating protein transferase activity                                                        | 179/10189, 1.8% | 182/10487, 1.7% | 1.000 |
| signal transducer activity                                                                            | 784/10189, 7.7% | 803/10487, 7.7% | 1.000 |
| transferase activity, transferring                                                                    | 49/10189, 0.5%  | 49/10487, 0.5%  | 1.000 |

|                                                                                                                                                                                                                    |                 |                 |       |
|--------------------------------------------------------------------------------------------------------------------------------------------------------------------------------------------------------------------|-----------------|-----------------|-------|
| sulfur-containing groups                                                                                                                                                                                           |                 |                 |       |
| hormone receptor binding                                                                                                                                                                                           | 49/10189, 0.5%  | 49/10487, 0.5%  | 1.000 |
| oxidoreductase activity, acting on single donors with incorporation of molecular O <sub>2</sub>                                                                                                                    | 48/10189, 0.5%  | 48/10487, 0.5%  | 1.000 |
| protein tyrosine kinase activity                                                                                                                                                                                   | 47/10189, 0.5%  | 47/10487, 0.4%  | 1.000 |
| transferase activity, transferring hexosyl groups                                                                                                                                                                  | 91/10189, 0.9%  | 92/10487, 0.9%  | 1.000 |
| organic acid transmembrane transporter activity                                                                                                                                                                    | 46/10189, 0.5%  | 46/10487, 0.4%  | 1.000 |
| N-acetyltransferase activity                                                                                                                                                                                       | 46/10189, 0.5%  | 46/10487, 0.4%  | 1.000 |
| transferase activity, transferring alkyl or aryl (other than methyl) groups                                                                                                                                        | 45/10189, 0.4%  | 45/10487, 0.4%  | 1.000 |
| carbohydrate binding                                                                                                                                                                                               | 129/10189, 1.3% | 131/10487, 1.2% | 1.000 |
| ligand-activated sequence-specific DNA binding RNA polymerase II transcription factor activity                                                                                                                     | 44/10189, 0.4%  | 44/10487, 0.4%  | 1.000 |
| S-adenosylmethionine-dependent methyltransferase activity                                                                                                                                                          | 44/10189, 0.4%  | 44/10487, 0.4%  | 1.000 |
| carbon-carbon lyase activity                                                                                                                                                                                       | 44/10189, 0.4%  | 44/10487, 0.4%  | 1.000 |
| direct ligand regulated sequence-specific DNA binding transcription factor activity                                                                                                                                | 44/10189, 0.4%  | 44/10487, 0.4%  | 1.000 |
| small GTPase regulator activity                                                                                                                                                                                    | 85/10189, 0.8%  | 86/10487, 0.8%  | 1.000 |
| sodium ion transmembrane transporter activity                                                                                                                                                                      | 42/10189, 0.4%  | 42/10487, 0.4%  | 1.000 |
| cysteine-type peptidase activity                                                                                                                                                                                   | 40/10189, 0.4%  | 40/10487, 0.4%  | 1.000 |
| transferase activity, transferring nitrogenous groups                                                                                                                                                              | 40/10189, 0.4%  | 40/10487, 0.4%  | 1.000 |
| guanyl-nucleotide exchange factor activity                                                                                                                                                                         | 39/10189, 0.4%  | 39/10487, 0.4%  | 1.000 |
| cation-transporting ATPase activity                                                                                                                                                                                | 39/10189, 0.4%  | 39/10487, 0.4%  | 1.000 |
| phosphoric ester hydrolase activity                                                                                                                                                                                | 232/10189, 2.3% | 237/10487, 2.3% | 1.000 |
| motor activity                                                                                                                                                                                                     | 38/10189, 0.4%  | 38/10487, 0.4%  | 1.000 |
| Ras guanyl-nucleotide exchange factor activity                                                                                                                                                                     | 38/10189, 0.4%  | 38/10487, 0.4%  | 1.000 |
| oxidoreductase activity, acting on paired donors, with incorporation or reduction of molecular O <sub>2</sub> , 2-oxoglutarate as one donor, and incorporation of one atom each of O <sub>2</sub> into both donors | 37/10189, 0.4%  | 37/10487, 0.4%  | 1.000 |
| transferase activity, transferring pentosyl groups                                                                                                                                                                 | 37/10189, 0.4%  | 37/10487, 0.4%  | 1.000 |
| ligase activity, forming carbon-sulfur bonds                                                                                                                                                                       | 37/10189, 0.4%  | 37/10487, 0.4%  | 1.000 |
| vitamin binding                                                                                                                                                                                                    | 37/10189, 0.4%  | 37/10487, 0.4%  | 1.000 |
| primary active transmembrane transporter                                                                                                                                                                           | 77/10189, 0.8%  | 78/10487, 0.7%  | 1.000 |

|                                                                                                |                 |                 |       |
|------------------------------------------------------------------------------------------------|-----------------|-----------------|-------|
| activity                                                                                       |                 |                 |       |
| P-P-bond-hydrolysis-driven transmembrane transporter activity                                  | 77/10189, 0.8%  | 78/10487, 0.7%  | 1.000 |
| signaling receptor activity                                                                    | 516/10189, 5.1% | 529/10487, 5.0% | 1.000 |
| sequence-specific DNA binding transcription factor activity                                    | 75/10189, 0.7%  | 76/10487, 0.7%  | 1.000 |
| anion channel activity                                                                         | 35/10189, 0.3%  | 35/10487, 0.3%  | 1.000 |
| nuclear hormone receptor binding                                                               | 35/10189, 0.3%  | 35/10487, 0.3%  | 1.000 |
| monooxygenase activity                                                                         | 74/10189, 0.7%  | 75/10487, 0.7%  | 1.000 |
| sequence-specific DNA binding RNA polymerase II transcription factor activity                  | 73/10189, 0.7%  | 74/10487, 0.7%  | 1.000 |
| actin binding                                                                                  | 34/10189, 0.3%  | 34/10487, 0.3%  | 1.000 |
| phosphoric diester hydrolase activity                                                          | 34/10189, 0.3%  | 34/10487, 0.3%  | 1.000 |
| organic anion transmembrane transporter activity                                               | 34/10189, 0.3%  | 34/10487, 0.3%  | 1.000 |
| carboxylic acid transmembrane transporter activity                                             | 34/10189, 0.3%  | 34/10487, 0.3%  | 1.000 |
| phosphatidylinositol binding                                                                   | 33/10189, 0.3%  | 33/10487, 0.3%  | 1.000 |
| cation transmembrane transporter activity                                                      | 290/10189, 2.8% | 297/10487, 2.8% | 1.000 |
| transmembrane signaling receptor activity                                                      | 501/10189, 4.9% | 514/10487, 4.9% | 1.000 |
| lysine N-acetyltransferase activity, acting on acetyl phosphate as donor                       | 32/10189, 0.3%  | 32/10487, 0.3%  | 1.000 |
| intramolecular transferase activity                                                            | 32/10189, 0.3%  | 32/10487, 0.3%  | 1.000 |
| RNA binding                                                                                    | 286/10189, 2.8% | 293/10487, 2.8% | 1.000 |
| N-methyltransferase activity                                                                   | 31/10189, 0.3%  | 31/10487, 0.3%  | 1.000 |
| symporter activity                                                                             | 31/10189, 0.3%  | 31/10487, 0.3%  | 1.000 |
| solute:cation symporter activity                                                               | 31/10189, 0.3%  | 31/10487, 0.3%  | 1.000 |
| lipase activity                                                                                | 31/10189, 0.3%  | 31/10487, 0.3%  | 1.000 |
| hydro-lyase activity                                                                           | 31/10189, 0.3%  | 31/10487, 0.3%  | 1.000 |
| small conjugating protein-specific protease activity                                           | 31/10189, 0.3%  | 31/10487, 0.3%  | 1.000 |
| hydrolase activity, acting on acid anhydrides, catalyzing transmembrane movement of substances | 68/10189, 0.7%  | 69/10487, 0.7%  | 1.000 |
| ATPase activity, coupled to transmembrane movement of substances                               | 67/10189, 0.7%  | 68/10487, 0.6%  | 1.000 |
| ATPase activity, coupled to movement of substances                                             | 67/10189, 0.7%  | 68/10487, 0.6%  | 1.000 |
| transmembrane receptor protein kinase activity                                                 | 29/10189, 0.3%  | 29/10487, 0.3%  | 1.000 |
| phosphatase binding                                                                            | 29/10189, 0.3%  | 29/10487, 0.3%  | 1.000 |
| anion binding                                                                                  | 172/10189, 1.7% | 176/10487, 1.7% | 1.000 |
| protein complex binding                                                                        | 65/10189, 0.6%  | 66/10487, 0.6%  | 1.000 |

|                                                                        |                 |                 |       |
|------------------------------------------------------------------------|-----------------|-----------------|-------|
| transcription factor binding                                           | 64/10189, 0.6%  | 65/10487, 0.6%  | 1.000 |
| exopeptidase activity                                                  | 64/10189, 0.6%  | 65/10487, 0.6%  | 1.000 |
| mRNA binding                                                           | 28/10189, 0.3%  | 28/10487, 0.3%  | 1.000 |
| macrolide binding                                                      | 28/10189, 0.3%  | 28/10487, 0.3%  | 1.000 |
| drug binding                                                           | 28/10189, 0.3%  | 28/10487, 0.3%  | 1.000 |
| oxidoreductase activity, acting on the aldehyde or oxo group of donors | 28/10189, 0.3%  | 28/10487, 0.3%  | 1.000 |
| neurotransmitter receptor activity                                     | 28/10189, 0.3%  | 28/10487, 0.3%  | 1.000 |
| poly(A) RNA binding                                                    | 28/10189, 0.3%  | 28/10487, 0.3%  | 1.000 |
| acetyltransferase activity                                             | 63/10189, 0.6%  | 64/10487, 0.6%  | 1.000 |
| hydrolase activity, acting on carbon-nitrogen (but not peptide) bonds  | 63/10189, 0.6%  | 64/10487, 0.6%  | 1.000 |
| ATPase activity, coupled to transmembrane movement of ions             | 63/10189, 0.6%  | 64/10487, 0.6%  | 1.000 |
| pattern binding                                                        | 27/10189, 0.3%  | 27/10487, 0.3%  | 1.000 |
| helicase activity                                                      | 27/10189, 0.3%  | 27/10487, 0.3%  | 1.000 |
| phospholipase activity                                                 | 27/10189, 0.3%  | 27/10487, 0.3%  | 1.000 |
| extracellular ligand-gated ion channel activity                        | 27/10189, 0.3%  | 27/10487, 0.3%  | 1.000 |
| amino acid transmembrane transporter activity                          | 27/10189, 0.3%  | 27/10487, 0.3%  | 1.000 |
| carboxy-lyase activity                                                 | 27/10189, 0.3%  | 27/10487, 0.3%  | 1.000 |
| DNA polymerase activity                                                | 27/10189, 0.3%  | 27/10487, 0.3%  | 1.000 |
| excitatory extracellular ligand-gated ion channel activity             | 26/10189, 0.3%  | 26/10487, 0.2%  | 1.000 |
| steroid binding                                                        | 26/10189, 0.3%  | 26/10487, 0.2%  | 1.000 |
| acetylglucosaminyltransferase activity                                 | 26/10189, 0.3%  | 26/10487, 0.2%  | 1.000 |
| adenyltransferase activity                                             | 26/10189, 0.3%  | 26/10487, 0.2%  | 1.000 |
| G-protein coupled chemoattractant receptor activity                    | 25/10189, 0.2%  | 25/10487, 0.2%  | 1.000 |
| nucleoside binding                                                     | 25/10189, 0.2%  | 25/10487, 0.2%  | 1.000 |
| sulfotransferase activity                                              | 25/10189, 0.2%  | 25/10487, 0.2%  | 1.000 |
| protein-lipid complex binding                                          | 25/10189, 0.2%  | 25/10487, 0.2%  | 1.000 |
| solute:sodium symporter activity                                       | 24/10189, 0.2%  | 24/10487, 0.2%  | 1.000 |
| steroid dehydrogenase activity                                         | 24/10189, 0.2%  | 24/10487, 0.2%  | 1.000 |
| GTPase binding                                                         | 24/10189, 0.2%  | 24/10487, 0.2%  | 1.000 |
| lipoprotein particle binding                                           | 24/10189, 0.2%  | 24/10487, 0.2%  | 1.000 |
| endopeptidase regulator activity                                       | 124/10189, 1.2% | 127/10487, 1.2% | 1.000 |
| deoxyribonuclease activity                                             | 23/10189, 0.2%  | 23/10487, 0.2%  | 1.000 |
| neuropeptide receptor activity                                         | 23/10189, 0.2%  | 23/10487, 0.2%  | 1.000 |
| G-protein coupled amine receptor activity                              | 23/10189, 0.2%  | 23/10487, 0.2%  | 1.000 |
| protein methyltransferase activity                                     | 23/10189, 0.2%  | 23/10487, 0.2%  | 1.000 |
| hydrolase activity, acting on                                          | 23/10189, 0.2%  | 23/10487, 0.2%  | 1.000 |

|                                                                                                                                                                      |                 |                 |       |
|----------------------------------------------------------------------------------------------------------------------------------------------------------------------|-----------------|-----------------|-------|
| carbon-nitrogen (but not peptide) bonds, in linear amides                                                                                                            |                 |                 |       |
| acid-amino acid ligase activity                                                                                                                                      | 23/10189, 0.2%  | 23/10487, 0.2%  | 1.000 |
| G-protein coupled nucleotide receptor activity                                                                                                                       | 22/10189, 0.2%  | 22/10487, 0.2%  | 1.000 |
| transcription coactivator activity                                                                                                                                   | 22/10189, 0.2%  | 22/10487, 0.2%  | 1.000 |
| fatty acid binding                                                                                                                                                   | 22/10189, 0.2%  | 22/10487, 0.2%  | 1.000 |
| oxidoreductase activity, acting on paired donors, with incorporation or reduction of molecular oxygen, NAD(P)H as one donor, and incorporation of one atom of oxygen | 22/10189, 0.2%  | 22/10487, 0.2%  | 1.000 |
| monocarboxylic acid binding                                                                                                                                          | 22/10189, 0.2%  | 22/10487, 0.2%  | 1.000 |
| steroid hormone receptor binding                                                                                                                                     | 22/10189, 0.2%  | 22/10487, 0.2%  | 1.000 |
| translation factor activity, nucleic acid binding                                                                                                                    | 86/10189, 0.8%  | 88/10487, 0.8%  | 1.000 |
| GTPase regulator activity                                                                                                                                            | 119/10189, 1.2% | 122/10487, 1.2% | 1.000 |
| nucleoside-triphosphatase regulator activity                                                                                                                         | 119/10189, 1.2% | 122/10487, 1.2% | 1.000 |
| phosphatase activity                                                                                                                                                 | 185/10189, 1.8% | 190/10487, 1.8% | 1.000 |
| receptor signaling protein activity                                                                                                                                  | 21/10189, 0.2%  | 21/10487, 0.2%  | 1.000 |
| transaminase activity                                                                                                                                                | 21/10189, 0.2%  | 21/10487, 0.2%  | 1.000 |
| structure-specific DNA binding                                                                                                                                       | 84/10189, 0.8%  | 86/10487, 0.8%  | 1.000 |
| purine nucleoside binding                                                                                                                                            | 20/10189, 0.2%  | 20/10487, 0.2%  | 1.000 |
| oxidoreductase activity, acting on the CH-NH group of donors, NAD or NADP as acceptor                                                                                | 20/10189, 0.2%  | 20/10487, 0.2%  | 1.000 |
| carbon-sulfur lyase activity                                                                                                                                         | 20/10189, 0.2%  | 20/10487, 0.2%  | 1.000 |
| GABA receptor activity                                                                                                                                               | 20/10189, 0.2%  | 20/10487, 0.2%  | 1.000 |
| protein kinase binding                                                                                                                                               | 20/10189, 0.2%  | 20/10487, 0.2%  | 1.000 |
| ribonucleoside binding                                                                                                                                               | 20/10189, 0.2%  | 20/10487, 0.2%  | 1.000 |
| purine ribonucleoside binding                                                                                                                                        | 20/10189, 0.2%  | 20/10487, 0.2%  | 1.000 |
| cell adhesion molecule binding                                                                                                                                       | 20/10189, 0.2%  | 20/10487, 0.2%  | 1.000 |
| DNA binding                                                                                                                                                          | 411/10189, 4.0% | 423/10487, 4.0% | 1.000 |
| endodeoxyribonuclease activity                                                                                                                                       | 19/10189, 0.2%  | 19/10487, 0.2%  | 1.000 |
| chemokine receptor activity                                                                                                                                          | 19/10189, 0.2%  | 19/10487, 0.2%  | 1.000 |
| organic acid:sodium symporter activity                                                                                                                               | 19/10189, 0.2%  | 19/10487, 0.2%  | 1.000 |
| inorganic anion transmembrane transporter activity                                                                                                                   | 19/10189, 0.2%  | 19/10487, 0.2%  | 1.000 |
| oxidoreductase activity, acting on the aldehyde or oxo group of donors, NAD or NADP as acceptor                                                                      | 19/10189, 0.2%  | 19/10487, 0.2%  | 1.000 |
| Ras GTPase binding                                                                                                                                                   | 19/10189, 0.2%  | 19/10487, 0.2%  | 1.000 |
| small GTPase binding                                                                                                                                                 | 19/10189, 0.2%  | 19/10487, 0.2%  | 1.000 |
| monosaccharide binding                                                                                                                                               | 19/10189, 0.2%  | 19/10487, 0.2%  | 1.000 |

|                                                                                                                                       |                   |                   |       |
|---------------------------------------------------------------------------------------------------------------------------------------|-------------------|-------------------|-------|
| protein binding                                                                                                                       | 2186/10189, 21.5% | 2251/10487, 21.5% | 1.000 |
| endopeptidase inhibitor activity                                                                                                      | 111/10189, 1.1%   | 114/10487, 1.1%   | 1.000 |
| receptor signaling protein serine/threonine kinase activity                                                                           | 18/10189, 0.2%    | 18/10487, 0.2%    | 1.000 |
| neurotransmitter transporter activity                                                                                                 | 18/10189, 0.2%    | 18/10487, 0.2%    | 1.000 |
| galactosyltransferase activity                                                                                                        | 18/10189, 0.2%    | 18/10487, 0.2%    | 1.000 |
| intramolecular oxidoreductase activity, interconverting aldoses and ketoses                                                           | 18/10189, 0.2%    | 18/10487, 0.2%    | 1.000 |
| protein phosphatase regulator activity                                                                                                | 18/10189, 0.2%    | 18/10487, 0.2%    | 1.000 |
| steroid dehydrogenase activity, acting on the CH-OH group of donors, NAD or NADP as acceptor                                          | 18/10189, 0.2%    | 18/10487, 0.2%    | 1.000 |
| alcohol binding                                                                                                                       | 18/10189, 0.2%    | 18/10487, 0.2%    | 1.000 |
| RNA methyltransferase activity                                                                                                        | 17/10189, 0.2%    | 17/10487, 0.2%    | 1.000 |
| antiporter activity                                                                                                                   | 17/10189, 0.2%    | 17/10487, 0.2%    | 1.000 |
| oxidoreductase activity, acting on the CH-CH group of donors, NAD or NADP as acceptor                                                 | 17/10189, 0.2%    | 17/10487, 0.2%    | 1.000 |
| polysaccharide binding                                                                                                                | 17/10189, 0.2%    | 17/10487, 0.2%    | 1.000 |
| sterol binding                                                                                                                        | 17/10189, 0.2%    | 17/10487, 0.2%    | 1.000 |
| UDP-galactosyltransferase activity                                                                                                    | 17/10189, 0.2%    | 17/10487, 0.2%    | 1.000 |
| histone binding                                                                                                                       | 17/10189, 0.2%    | 17/10487, 0.2%    | 1.000 |
| cyclic-nucleotide phosphodiesterase activity                                                                                          | 16/10189, 0.2%    | 16/10487, 0.2%    | 1.000 |
| transmembrane receptor protein serine/threonine kinase activity                                                                       | 16/10189, 0.2%    | 16/10487, 0.2%    | 1.000 |
| carbohydrate transmembrane transporter activity                                                                                       | 16/10189, 0.2%    | 16/10487, 0.2%    | 1.000 |
| growth factor receptor binding                                                                                                        | 16/10189, 0.2%    | 16/10487, 0.2%    | 1.000 |
| carbohydrate transporter activity                                                                                                     | 16/10189, 0.2%    | 16/10487, 0.2%    | 1.000 |
| nucleotidase activity                                                                                                                 | 15/10189, 0.1%    | 15/10487, 0.1%    | 1.000 |
| mannosidase activity                                                                                                                  | 15/10189, 0.1%    | 15/10487, 0.1%    | 1.000 |
| lysine N-methyltransferase activity                                                                                                   | 15/10189, 0.1%    | 15/10487, 0.1%    | 1.000 |
| protein-lysine N-methyltransferase activity                                                                                           | 15/10189, 0.1%    | 15/10487, 0.1%    | 1.000 |
| CoA-ligase activity                                                                                                                   | 15/10189, 0.1%    | 15/10487, 0.1%    | 1.000 |
| oxidoreductase activity, acting on single donors with incorporation of molecular oxygen, incorporation of two atoms of O <sub>2</sub> | 15/10189, 0.1%    | 15/10487, 0.1%    | 1.000 |
| GTPase activator activity                                                                                                             | 42/10189, 0.4%    | 43/10487, 0.4%    | 1.000 |
| Ras GTPase activator activity                                                                                                         | 42/10189, 0.4%    | 43/10487, 0.4%    | 1.000 |
| chromatin binding                                                                                                                     | 14/10189, 0.1%    | 14/10487, 0.1%    | 1.000 |
| sialyltransferase activity                                                                                                            | 14/10189, 0.1%    | 14/10487, 0.1%    | 1.000 |
| nucleobase-containing compound transmembrane transporter activity                                                                     | 14/10189, 0.1%    | 14/10487, 0.1%    | 1.000 |



|                                                                                                              |                 |                 |       |
|--------------------------------------------------------------------------------------------------------------|-----------------|-----------------|-------|
| GMP binding                                                                                                  | 14/10189, 0.1%  | 14/10487, 0.1%  | 1.000 |
| G-protein coupled receptor activity                                                                          | 252/10189, 2.5% | 260/10487, 2.5% | 1.000 |
| transmembrane receptor protein tyrosine kinase activity                                                      | 13/10189, 0.1%  | 13/10487, 0.1%  | 1.000 |
| signal sequence binding                                                                                      | 13/10189, 0.1%  | 13/10487, 0.1%  | 1.000 |
| voltage-gated potassium channel activity                                                                     | 13/10189, 0.1%  | 13/10487, 0.1%  | 1.000 |
| chloride transmembrane transporter activity                                                                  | 13/10189, 0.1%  | 13/10487, 0.1%  | 1.000 |
| sterol transporter activity                                                                                  | 13/10189, 0.1%  | 13/10487, 0.1%  | 1.000 |
| intramolecular transferase activity, phosphotransferases                                                     | 13/10189, 0.1%  | 13/10487, 0.1%  | 1.000 |
| carbohydrate phosphatase activity                                                                            | 13/10189, 0.1%  | 13/10487, 0.1%  | 1.000 |
| wide pore channel activity                                                                                   | 13/10189, 0.1%  | 13/10487, 0.1%  | 1.000 |
| heat shock protein binding                                                                                   | 13/10189, 0.1%  | 13/10487, 0.1%  | 1.000 |
| sugar transmembrane transporter activity                                                                     | 13/10189, 0.1%  | 13/10487, 0.1%  | 1.000 |
| macromolecular complex binding                                                                               | 125/10189, 1.2% | 129/10487, 1.2% | 1.000 |
| antioxidant activity                                                                                         | 38/10189, 0.4%  | 39/10487, 0.4%  | 1.000 |
| intramolecular oxidoreductase activity                                                                       | 37/10189, 0.4%  | 38/10487, 0.4%  | 1.000 |
| enzyme inhibitor activity                                                                                    | 153/10189, 1.5% | 158/10487, 1.5% | 1.000 |
| prenyltransferase activity                                                                                   | 12/10189, 0.1%  | 12/10487, 0.1%  | 1.000 |
| protein histidine kinase activity                                                                            | 12/10189, 0.1%  | 12/10487, 0.1%  | 1.000 |
| chloride channel activity                                                                                    | 12/10189, 0.1%  | 12/10487, 0.1%  | 1.000 |
| steroid hydroxylase activity                                                                                 | 12/10189, 0.1%  | 12/10487, 0.1%  | 1.000 |
| small protein activating enzyme activity                                                                     | 12/10189, 0.1%  | 12/10487, 0.1%  | 1.000 |
| C-acyltransferase activity                                                                                   | 12/10189, 0.1%  | 12/10487, 0.1%  | 1.000 |
| hydroxymethyl-, formyl- and related transferase activity                                                     | 12/10189, 0.1%  | 12/10487, 0.1%  | 1.000 |
| phosphotransferase activity, nitrogenous group as acceptor                                                   | 12/10189, 0.1%  | 12/10487, 0.1%  | 1.000 |
| hydrolase activity, hydrolyzing N-glycosyl compounds                                                         | 12/10189, 0.1%  | 12/10487, 0.1%  | 1.000 |
| acid-thiol ligase activity                                                                                   | 12/10189, 0.1%  | 12/10487, 0.1%  | 1.000 |
| endonuclease activity, active with either ribo- or deoxyribonucleic acids and producing 5'-phosphomonoesters | 12/10189, 0.1%  | 12/10487, 0.1%  | 1.000 |
| rRNA binding                                                                                                 | 12/10189, 0.1%  | 12/10487, 0.1%  | 1.000 |
| MHC protein binding                                                                                          | 12/10189, 0.1%  | 12/10487, 0.1%  | 1.000 |
| retinoic acid receptor binding                                                                               | 12/10189, 0.1%  | 12/10487, 0.1%  | 1.000 |
| SMAD binding                                                                                                 | 12/10189, 0.1%  | 12/10487, 0.1%  | 1.000 |
| NAD binding                                                                                                  | 12/10189, 0.1%  | 12/10487, 0.1%  | 1.000 |
| enzyme regulator activity                                                                                    | 433/10189, 4.2% | 447/10487, 4.3% | 1.000 |
| O-acyltransferase activity                                                                                   | 36/10189, 0.4%  | 37/10487, 0.4%  | 1.000 |
| amide binding                                                                                                | 36/10189, 0.4%  | 37/10487, 0.4%  | 1.000 |
| peptide binding                                                                                              | 36/10189, 0.4%  | 37/10487, 0.4%  | 1.000 |

|                                                                     |                 |                 |       |
|---------------------------------------------------------------------|-----------------|-----------------|-------|
| inorganic cation transmembrane transporter activity                 | 209/10189, 2.1% | 216/10487, 2.1% | 1.000 |
| DNA helicase activity                                               | 11/10189, 0.1%  | 11/10487, 0.1%  | 1.000 |
| intracellular ligand-gated ion channel activity                     | 11/10189, 0.1%  | 11/10487, 0.1%  | 1.000 |
| hexosaminidase activity                                             | 11/10189, 0.1%  | 11/10487, 0.1%  | 1.000 |
| nucleotide receptor activity                                        | 11/10189, 0.1%  | 11/10487, 0.1%  | 1.000 |
| phosphotransferase activity, for other substituted phosphate groups | 11/10189, 0.1%  | 11/10487, 0.1%  | 1.000 |
| cyclo-ligase activity                                               | 11/10189, 0.1%  | 11/10487, 0.1%  | 1.000 |
| carbohydrate kinase activity                                        | 11/10189, 0.1%  | 11/10487, 0.1%  | 1.000 |
| receptor activator activity                                         | 11/10189, 0.1%  | 11/10487, 0.1%  | 1.000 |
| phosphatidylinositol 3-kinase activity                              | 11/10189, 0.1%  | 11/10487, 0.1%  | 1.000 |
| transition metal ion transmembrane transporter activity             | 11/10189, 0.1%  | 11/10487, 0.1%  | 1.000 |
| peptidase inhibitor activity                                        | 118/10189, 1.2% | 122/10487, 1.2% | 1.000 |
| cytokine receptor activity                                          | 33/10189, 0.3%  | 34/10487, 0.3%  | 1.000 |
| phosphotransferase activity, phosphate group as acceptor            | 33/10189, 0.3%  | 34/10487, 0.3%  | 1.000 |
| 3',5'-cyclic-nucleotide phosphodiesterase activity                  | 10/10189, 0.1%  | 10/10487, 0.1%  | 1.000 |
| calcium activated cation channel activity                           | 10/10189, 0.1%  | 10/10487, 0.1%  | 1.000 |
| dicarboxylic acid transmembrane transporter activity                | 10/10189, 0.1%  | 10/10487, 0.1%  | 1.000 |
| metalloexopeptidase activity                                        | 10/10189, 0.1%  | 10/10487, 0.1%  | 1.000 |
| ion gated channel activity                                          | 10/10189, 0.1%  | 10/10487, 0.1%  | 1.000 |
| NADP binding                                                        | 10/10189, 0.1%  | 10/10487, 0.1%  | 1.000 |
| kinase regulator activity                                           | 58/10189, 0.6%  | 60/10487, 0.6%  | 1.000 |
| monovalent inorganic cation transmembrane transporter activity      | 171/10189, 1.7% | 177/10487, 1.7% | 1.000 |
| aldo-keto reductase (NADP) activity                                 | 9/10189, 0.1%   | 9/10487, 0.1%   | 1.000 |
| cysteine-type endopeptidase activity                                | 9/10189, 0.1%   | 9/10487, 0.1%   | 1.000 |
| phospholipase C activity                                            | 9/10189, 0.1%   | 9/10487, 0.1%   | 1.000 |
| ubiquitin-protein transferase activity                              | 9/10189, 0.1%   | 9/10487, 0.1%   | 1.000 |
| protein kinase inhibitor activity                                   | 9/10189, 0.1%   | 9/10487, 0.1%   | 1.000 |
| cysteine-type endopeptidase inhibitor activity                      | 9/10189, 0.1%   | 9/10487, 0.1%   | 1.000 |
| transforming growth factor beta-activated receptor activity         | 9/10189, 0.1%   | 9/10487, 0.1%   | 1.000 |
| O-methyltransferase activity                                        | 9/10189, 0.1%   | 9/10487, 0.1%   | 1.000 |
| tRNA methyltransferase activity                                     | 9/10189, 0.1%   | 9/10487, 0.1%   | 1.000 |
| phosphofructokinase activity                                        | 9/10189, 0.1%   | 9/10487, 0.1%   | 1.000 |
| monosaccharide transmembrane transporter                            | 9/10189, 0.1%   | 9/10487, 0.1%   | 1.000 |

|                                                                                           |                |                |       |
|-------------------------------------------------------------------------------------------|----------------|----------------|-------|
| activity                                                                                  |                |                |       |
| hexose transmembrane transporter activity                                                 | 9/10189, 0.1%  | 9/10487, 0.1%  | 1.000 |
| neutral amino acid transmembrane transporter activity                                     | 9/10189, 0.1%  | 9/10487, 0.1%  | 1.000 |
| oxidoreductase activity, oxidizing metal ions                                             | 9/10189, 0.1%  | 9/10487, 0.1%  | 1.000 |
| transferase activity, transferring amino-acyl groups                                      | 9/10189, 0.1%  | 9/10487, 0.1%  | 1.000 |
| hydrolase activity, acting on ether bonds                                                 | 9/10189, 0.1%  | 9/10487, 0.1%  | 1.000 |
| hydrolase activity, acting on carbon-nitrogen (but not peptide) bonds, in linear amidines | 9/10189, 0.1%  | 9/10487, 0.1%  | 1.000 |
| aldehyde-lyase activity                                                                   | 9/10189, 0.1%  | 9/10487, 0.1%  | 1.000 |
| endoribonuclease activity, producing 5'-phosphomonoesters                                 | 9/10189, 0.1%  | 9/10487, 0.1%  | 1.000 |
| Rho GTPase binding                                                                        | 9/10189, 0.1%  | 9/10487, 0.1%  | 1.000 |
| kinase inhibitor activity                                                                 | 9/10189, 0.1%  | 9/10487, 0.1%  | 1.000 |
| procollagen-proline dioxygenase activity                                                  | 9/10189, 0.1%  | 9/10487, 0.1%  | 1.000 |
| peptidyl-proline dioxygenase activity                                                     | 9/10189, 0.1%  | 9/10487, 0.1%  | 1.000 |
| histone methyltransferase activity                                                        | 9/10189, 0.1%  | 9/10487, 0.1%  | 1.000 |
| oxidoreductase activity, acting on NAD(P)H, oxygen as acceptor                            | 9/10189, 0.1%  | 9/10487, 0.1%  | 1.000 |
| exonuclease activity                                                                      | 30/10189, 0.3% | 31/10487, 0.3% | 1.000 |
| glycoprotein binding                                                                      | 8/10189, 0.1%  | 8/10487, 0.1%  | 1.000 |
| icosanoid receptor activity                                                               | 8/10189, 0.1%  | 8/10487, 0.1%  | 1.000 |
| sodium channel activity                                                                   | 8/10189, 0.1%  | 8/10487, 0.1%  | 1.000 |
| cation:amino acid symporter activity                                                      | 8/10189, 0.1%  | 8/10487, 0.1%  | 1.000 |
| protein prenyltransferase activity                                                        | 8/10189, 0.1%  | 8/10487, 0.1%  | 1.000 |
| acetylgalactosaminyltransferase activity                                                  | 8/10189, 0.1%  | 8/10487, 0.1%  | 1.000 |
| fucosyltransferase activity                                                               | 8/10189, 0.1%  | 8/10487, 0.1%  | 1.000 |
| potassium-transporting ATPase activity                                                    | 8/10189, 0.1%  | 8/10487, 0.1%  | 1.000 |
| thyroid hormone receptor activator activity                                               | 8/10189, 0.1%  | 8/10487, 0.1%  | 1.000 |
| solute:cation antiporter activity                                                         | 8/10189, 0.1%  | 8/10487, 0.1%  | 1.000 |
| anion:anion antiporter activity                                                           | 8/10189, 0.1%  | 8/10487, 0.1%  | 1.000 |
| cyclin-dependent protein serine/threonine kinase regulator activity                       | 8/10189, 0.1%  | 8/10487, 0.1%  | 1.000 |
| oxidoreductase activity, acting on the CH-CH group of donors, O <sub>2</sub> as acceptor  | 8/10189, 0.1%  | 8/10487, 0.1%  | 1.000 |
| diphosphotransferase activity                                                             | 8/10189, 0.1%  | 8/10487, 0.1%  | 1.000 |
| DNA N-glycosylase activity                                                                | 8/10189, 0.1%  | 8/10487, 0.1%  | 1.000 |
| protein serine/threonine kinase inhibitor activity                                        | 8/10189, 0.1%  | 8/10487, 0.1%  | 1.000 |
| amide transmembrane transporter activity                                                  | 8/10189, 0.1%  | 8/10487, 0.1%  | 1.000 |

|                                                                                              |                 |                 |       |
|----------------------------------------------------------------------------------------------|-----------------|-----------------|-------|
| bioactive lipid receptor activity                                                            | 8/10189, 0.1%   | 8/10487, 0.1%   | 1.000 |
| transferase activity, transferring acyl groups, acyl groups converted into alkyl on transfer | 8/10189, 0.1%   | 8/10487, 0.1%   | 1.000 |
| nucleotidyltransferase activity                                                              | 104/10189, 1.0% | 108/10487, 1.0% | 1.000 |
| metal cluster binding                                                                        | 51/10189, 0.5%  | 53/10487, 0.5%  | 1.000 |
| peptidase regulator activity                                                                 | 131/10189, 1.3% | 136/10487, 1.3% | 1.000 |
| voltage-gated ion channel activity                                                           | 27/10189, 0.3%  | 28/10487, 0.3%  | 1.000 |
| lipid transporter activity                                                                   | 27/10189, 0.3%  | 28/10487, 0.3%  | 1.000 |
| voltage-gated channel activity                                                               | 27/10189, 0.3%  | 28/10487, 0.3%  | 1.000 |
| glycosaminoglycan binding                                                                    | 76/10189, 0.7%  | 79/10487, 0.8%  | 1.000 |
| DNA secondary structure binding                                                              | 7/10189, 0.1%   | 7/10487, 0.1%   | 1.000 |
| steroid hormone receptor activity                                                            | 7/10189, 0.1%   | 7/10487, 0.1%   | 1.000 |
| lactate dehydrogenase activity                                                               | 7/10189, 0.1%   | 7/10487, 0.1%   | 1.000 |
| nucleotide diphosphatase activity                                                            | 7/10189, 0.1%   | 7/10487, 0.1%   | 1.000 |
| protein geranylgeranyltransferase activity                                                   | 7/10189, 0.1%   | 7/10487, 0.1%   | 1.000 |
| sterol O-acyltransferase activity                                                            | 7/10189, 0.1%   | 7/10487, 0.1%   | 1.000 |
| succinate-CoA ligase activity                                                                | 7/10189, 0.1%   | 7/10487, 0.1%   | 1.000 |
| adrenergic receptor activity                                                                 | 7/10189, 0.1%   | 7/10487, 0.1%   | 1.000 |
| water transmembrane transporter activity                                                     | 7/10189, 0.1%   | 7/10487, 0.1%   | 1.000 |
| monovalent cation:proton antiporter activity                                                 | 7/10189, 0.1%   | 7/10487, 0.1%   | 1.000 |
| microtubule binding                                                                          | 7/10189, 0.1%   | 7/10487, 0.1%   | 1.000 |
| solute:proton antiporter activity                                                            | 7/10189, 0.1%   | 7/10487, 0.1%   | 1.000 |
| cation:cation antiporter activity                                                            | 7/10189, 0.1%   | 7/10487, 0.1%   | 1.000 |
| phosphatidylinositol phosphate kinase activity                                               | 7/10189, 0.1%   | 7/10487, 0.1%   | 1.000 |
| carnitine O-acyltransferase activity                                                         | 7/10189, 0.1%   | 7/10487, 0.1%   | 1.000 |
| palmitoyltransferase activity                                                                | 7/10189, 0.1%   | 7/10487, 0.1%   | 1.000 |
| transferase activity, transferring aldehyde or ketonic groups                                | 7/10189, 0.1%   | 7/10487, 0.1%   | 1.000 |
| sulfurtransferase activity                                                                   | 7/10189, 0.1%   | 7/10487, 0.1%   | 1.000 |
| carbon-nitrogen ligase activity, with glutamine as amido-N-donor                             | 7/10189, 0.1%   | 7/10487, 0.1%   | 1.000 |
| ligase activity, forming carbon-carbon bonds                                                 | 7/10189, 0.1%   | 7/10487, 0.1%   | 1.000 |
| oxidoreductase activity, acting on the CH-OH group of donors, O <sub>2</sub> as acceptor     | 7/10189, 0.1%   | 7/10487, 0.1%   | 1.000 |
| activin-activated receptor activity                                                          | 7/10189, 0.1%   | 7/10487, 0.1%   | 1.000 |
| histone-lysine N-methyltransferase activity                                                  | 7/10189, 0.1%   | 7/10487, 0.1%   | 1.000 |
| syntaxin binding                                                                             | 7/10189, 0.1%   | 7/10487, 0.1%   | 1.000 |
| low-density lipoprotein particle binding                                                     | 7/10189, 0.1%   | 7/10487, 0.1%   | 1.000 |
| adrenergic receptor binding                                                                  | 7/10189, 0.1%   | 7/10487, 0.1%   | 1.000 |
| receptor serine/threonine kinase binding                                                     | 7/10189, 0.1%   | 7/10487, 0.1%   | 1.000 |
| amine binding                                                                                | 7/10189, 0.1%   | 7/10487, 0.1%   | 1.000 |

|                                                                                                       |                 |                 |       |
|-------------------------------------------------------------------------------------------------------|-----------------|-----------------|-------|
| vitamin transporter activity                                                                          | 7/10189, 0.1%   | 7/10487, 0.1%   | 1.000 |
| uridylyltransferase activity                                                                          | 7/10189, 0.1%   | 7/10487, 0.1%   | 1.000 |
| transmembrane receptor protein serine/threonine kinase binding                                        | 7/10189, 0.1%   | 7/10487, 0.1%   | 1.000 |
| identical protein binding                                                                             | 241/10189, 2.4% | 250/10487, 2.4% | 1.000 |
| protein kinase regulator activity                                                                     | 48/10189, 0.5%  | 50/10487, 0.5%  | 1.000 |
| cyclase activity                                                                                      | 25/10189, 0.2%  | 26/10487, 0.2%  | 1.000 |
| antigen binding                                                                                       | 6/10189, 0.1%   | 6/10487, 0.1%   | 1.000 |
| acyl-CoA dehydrogenase activity                                                                       | 6/10189, 0.1%   | 6/10487, 0.1%   | 1.000 |
| dihydroorotate dehydrogenase activity                                                                 | 6/10189, 0.1%   | 6/10487, 0.1%   | 1.000 |
| oligosaccharyl transferase activity                                                                   | 6/10189, 0.1%   | 6/10487, 0.1%   | 1.000 |
| anaphylatoxin receptor activity                                                                       | 6/10189, 0.1%   | 6/10487, 0.1%   | 1.000 |
| prostanoid receptor activity                                                                          | 6/10189, 0.1%   | 6/10487, 0.1%   | 1.000 |
| melanocortin receptor activity                                                                        | 6/10189, 0.1%   | 6/10487, 0.1%   | 1.000 |
| neuropeptide Y receptor activity                                                                      | 6/10189, 0.1%   | 6/10487, 0.1%   | 1.000 |
| sodium:amino acid symporter activity                                                                  | 6/10189, 0.1%   | 6/10487, 0.1%   | 1.000 |
| collagen binding                                                                                      | 6/10189, 0.1%   | 6/10487, 0.1%   | 1.000 |
| glutamate receptor activity                                                                           | 6/10189, 0.1%   | 6/10487, 0.1%   | 1.000 |
| acidic amino acid transmembrane transporter activity                                                  | 6/10189, 0.1%   | 6/10487, 0.1%   | 1.000 |
| AMP binding                                                                                           | 6/10189, 0.1%   | 6/10487, 0.1%   | 1.000 |
| arginine N-methyltransferase activity                                                                 | 6/10189, 0.1%   | 6/10487, 0.1%   | 1.000 |
| protein-arginine N-methyltransferase activity                                                         | 6/10189, 0.1%   | 6/10487, 0.1%   | 1.000 |
| CoA carboxylase activity                                                                              | 6/10189, 0.1%   | 6/10487, 0.1%   | 1.000 |
| C-palmitoyltransferase activity                                                                       | 6/10189, 0.1%   | 6/10487, 0.1%   | 1.000 |
| oxidoreductase activity, acting on the CH-CH group of donors, quinone or related compound as acceptor | 6/10189, 0.1%   | 6/10487, 0.1%   | 1.000 |
| oxidoreductase activity, oxidizing metal ions, oxygen as acceptor                                     | 6/10189, 0.1%   | 6/10487, 0.1%   | 1.000 |
| immunoglobulin binding                                                                                | 6/10189, 0.1%   | 6/10487, 0.1%   | 1.000 |
| protein phosphatase binding                                                                           | 6/10189, 0.1%   | 6/10487, 0.1%   | 1.000 |
| mismatch repair complex binding                                                                       | 6/10189, 0.1%   | 6/10487, 0.1%   | 1.000 |
| steroid dehydrogenase activity, acting on the CH-CH group of donors                                   | 6/10189, 0.1%   | 6/10487, 0.1%   | 1.000 |
| bisphosphoglycerate phosphatase activity                                                              | 6/10189, 0.1%   | 6/10487, 0.1%   | 1.000 |
| lipase inhibitor activity                                                                             | 6/10189, 0.1%   | 6/10487, 0.1%   | 1.000 |
| guanylyltransferase activity                                                                          | 6/10189, 0.1%   | 6/10487, 0.1%   | 1.000 |
| lipopeptide binding                                                                                   | 6/10189, 0.1%   | 6/10487, 0.1%   | 1.000 |
| carbohydrate derivative transporter activity                                                          | 6/10189, 0.1%   | 6/10487, 0.1%   | 1.000 |
| phosphatase regulator activity                                                                        | 23/10189, 0.2%  | 24/10487, 0.2%  | 1.000 |
| lipopolysaccharide binding                                                                            | 5/10189, 0.0%   | 5/10487, 0.0%   | 1.000 |

|                                                                                                             |               |               |       |
|-------------------------------------------------------------------------------------------------------------|---------------|---------------|-------|
| RNA-directed DNA polymerase activity                                                                        | 5/10189, 0.0% | 5/10487, 0.0% | 1.000 |
| fatty acid synthase activity                                                                                | 5/10189, 0.0% | 5/10487, 0.0% | 1.000 |
| histone deacetylase activity                                                                                | 5/10189, 0.0% | 5/10487, 0.0% | 1.000 |
| calmodulin-dependent protein kinase activity                                                                | 5/10189, 0.0% | 5/10487, 0.0% | 1.000 |
| protein serine/threonine/tyrosine kinase activity                                                           | 5/10189, 0.0% | 5/10487, 0.0% | 1.000 |
| pyruvate dehydrogenase activity                                                                             | 5/10189, 0.0% | 5/10487, 0.0% | 1.000 |
| prostaglandin receptor activity                                                                             | 5/10189, 0.0% | 5/10487, 0.0% | 1.000 |
| inward rectifier potassium channel activity                                                                 | 5/10189, 0.0% | 5/10487, 0.0% | 1.000 |
| nucleoside transmembrane transporter activity                                                               | 5/10189, 0.0% | 5/10487, 0.0% | 1.000 |
| S-methyltransferase activity                                                                                | 5/10189, 0.0% | 5/10487, 0.0% | 1.000 |
| signaling pattern recognition receptor activity                                                             | 5/10189, 0.0% | 5/10487, 0.0% | 1.000 |
| sulfuric ester hydrolase activity                                                                           | 5/10189, 0.0% | 5/10487, 0.0% | 1.000 |
| glucuronosyltransferase activity                                                                            | 5/10189, 0.0% | 5/10487, 0.0% | 1.000 |
| aromatic amino acid transmembrane transporter activity                                                      | 5/10189, 0.0% | 5/10487, 0.0% | 1.000 |
| fatty acid ligase activity                                                                                  | 5/10189, 0.0% | 5/10487, 0.0% | 1.000 |
| galactosidase activity                                                                                      | 5/10189, 0.0% | 5/10487, 0.0% | 1.000 |
| CoA hydrolase activity                                                                                      | 5/10189, 0.0% | 5/10487, 0.0% | 1.000 |
| malate dehydrogenase activity                                                                               | 5/10189, 0.0% | 5/10487, 0.0% | 1.000 |
| oxidoreductase activity, acting on NAD(P)H, heme protein as acceptor                                        | 5/10189, 0.0% | 5/10487, 0.0% | 1.000 |
| exonuclease activity, active with either ribo- or deoxyribonucleic acids and producing 5'-phosphomonoesters | 5/10189, 0.0% | 5/10487, 0.0% | 1.000 |
| ether hydrolase activity                                                                                    | 5/10189, 0.0% | 5/10487, 0.0% | 1.000 |
| racemase and epimerase activity, acting on carbohydrates and derivatives                                    | 5/10189, 0.0% | 5/10487, 0.0% | 1.000 |
| intramolecular oxidoreductase activity, interconverting keto- and enol-groups                               | 5/10189, 0.0% | 5/10487, 0.0% | 1.000 |
| deacetylase activity                                                                                        | 5/10189, 0.0% | 5/10487, 0.0% | 1.000 |
| mismatched DNA binding                                                                                      | 5/10189, 0.0% | 5/10487, 0.0% | 1.000 |
| alkali metal ion binding                                                                                    | 5/10189, 0.0% | 5/10487, 0.0% | 1.000 |
| chromatin DNA binding                                                                                       | 5/10189, 0.0% | 5/10487, 0.0% | 1.000 |
| protein complex scaffold                                                                                    | 5/10189, 0.0% | 5/10487, 0.0% | 1.000 |
| protein deacetylase activity                                                                                | 5/10189, 0.0% | 5/10487, 0.0% | 1.000 |
| UDP-glucosyltransferase activity                                                                            | 5/10189, 0.0% | 5/10487, 0.0% | 1.000 |
| pattern recognition receptor activity                                                                       | 5/10189, 0.0% | 5/10487, 0.0% | 1.000 |
| glucosyltransferase activity                                                                                | 5/10189, 0.0% | 5/10487, 0.0% | 1.000 |
| phosphoprotein binding                                                                                      | 5/10189, 0.0% | 5/10487, 0.0% | 1.000 |

|                                                                                                                                                                                                              |                 |                 |       |
|--------------------------------------------------------------------------------------------------------------------------------------------------------------------------------------------------------------|-----------------|-----------------|-------|
| phosphoprotein phosphatase activity                                                                                                                                                                          | 90/10189, 0.9%  | 94/10487, 0.9%  | 1.000 |
| oxidoreductase activity, acting on the CH-NH2 group of donors                                                                                                                                                | 21/10189, 0.2%  | 22/10487, 0.2%  | 1.000 |
| nuclease activity                                                                                                                                                                                            | 112/10189, 1.1% | 117/10487, 1.1% | 1.000 |
| ATPase activity, coupled to transmembrane movement of ions, phosphorylative mechanism                                                                                                                        | 19/10189, 0.2%  | 20/10487, 0.2%  | 1.000 |
| oxidoreductase activity, acting on paired donors, with incorporation or reduction of molecular O <sub>2</sub> , reduced flavin or flavoprotein as one donor, and incorporation of one atom of O <sub>2</sub> | 19/10189, 0.2%  | 20/10487, 0.2%  | 1.000 |
| mannosyltransferase activity                                                                                                                                                                                 | 4/10189, 0.0%   | 4/10487, 0.0%   | 1.000 |
| peroxisome targeting sequence binding                                                                                                                                                                        | 4/10189, 0.0%   | 4/10487, 0.0%   | 1.000 |
| RNA helicase activity                                                                                                                                                                                        | 4/10189, 0.0%   | 4/10487, 0.0%   | 1.000 |
| translation release factor activity                                                                                                                                                                          | 4/10189, 0.0%   | 4/10487, 0.0%   | 1.000 |
| aldehyde dehydrogenase [NAD(P)+] activity                                                                                                                                                                    | 4/10189, 0.0%   | 4/10487, 0.0%   | 1.000 |
| carboxypeptidase activity                                                                                                                                                                                    | 4/10189, 0.0%   | 4/10487, 0.0%   | 1.000 |
| isocitrate dehydrogenase activity                                                                                                                                                                            | 4/10189, 0.0%   | 4/10487, 0.0%   | 1.000 |
| methylenetetrahydrofolate dehydrogenase [NAD(P)+] activity                                                                                                                                                   | 4/10189, 0.0%   | 4/10487, 0.0%   | 1.000 |
| exodeoxyribonuclease activity                                                                                                                                                                                | 4/10189, 0.0%   | 4/10487, 0.0%   | 1.000 |
| alpha-mannosidase activity                                                                                                                                                                                   | 4/10189, 0.0%   | 4/10487, 0.0%   | 1.000 |
| protein tyrosine phosphatase activity                                                                                                                                                                        | 4/10189, 0.0%   | 4/10487, 0.0%   | 1.000 |
| phospholipase inhibitor activity                                                                                                                                                                             | 4/10189, 0.0%   | 4/10487, 0.0%   | 1.000 |
| alpha-adrenergic receptor activity                                                                                                                                                                           | 4/10189, 0.0%   | 4/10487, 0.0%   | 1.000 |
| GDP-dissociation inhibitor activity                                                                                                                                                                          | 4/10189, 0.0%   | 4/10487, 0.0%   | 1.000 |
| transforming growth factor beta receptor binding                                                                                                                                                             | 4/10189, 0.0%   | 4/10487, 0.0%   | 1.000 |
| glucose transmembrane transporter activity                                                                                                                                                                   | 4/10189, 0.0%   | 4/10487, 0.0%   | 1.000 |
| cation:sugar symporter activity                                                                                                                                                                              | 4/10189, 0.0%   | 4/10487, 0.0%   | 1.000 |
| translation termination factor activity                                                                                                                                                                      | 4/10189, 0.0%   | 4/10487, 0.0%   | 1.000 |
| electron carrier activity                                                                                                                                                                                    | 4/10189, 0.0%   | 4/10487, 0.0%   | 1.000 |
| organic cation transmembrane transporter activity                                                                                                                                                            | 4/10189, 0.0%   | 4/10487, 0.0%   | 1.000 |
| L-amino acid transmembrane transporter activity                                                                                                                                                              | 4/10189, 0.0%   | 4/10487, 0.0%   | 1.000 |
| peptide transporter activity                                                                                                                                                                                 | 4/10189, 0.0%   | 4/10487, 0.0%   | 1.000 |
| anion:cation symporter activity                                                                                                                                                                              | 4/10189, 0.0%   | 4/10487, 0.0%   | 1.000 |
| alcohol transmembrane transporter activity                                                                                                                                                                   | 4/10189, 0.0%   | 4/10487, 0.0%   | 1.000 |
| mannosyl-oligosaccharide mannosidase activity                                                                                                                                                                | 4/10189, 0.0%   | 4/10487, 0.0%   | 1.000 |

|                                                                                                                                                               |                |                |       |
|---------------------------------------------------------------------------------------------------------------------------------------------------------------|----------------|----------------|-------|
| tRNA (guanine) methyltransferase activity                                                                                                                     | 4/10189, 0.0%  | 4/10487, 0.0%  | 1.000 |
| oxidoreductase activity, acting on the aldehyde or oxo group of donors, disulfide as acceptor                                                                 | 4/10189, 0.0%  | 4/10487, 0.0%  | 1.000 |
| oxidoreductase activity, acting on NAD(P)H, nitrogenous group as acceptor                                                                                     | 4/10189, 0.0%  | 4/10487, 0.0%  | 1.000 |
| oxidoreductase activity, acting on paired donors, with oxidation of a pair of donors resulting in the reduction of molecular oxygen to two molecules of water | 4/10189, 0.0%  | 4/10487, 0.0%  | 1.000 |
| oxidoreductase activity, acting on CH or CH <sub>2</sub> groups                                                                                               | 4/10189, 0.0%  | 4/10487, 0.0%  | 1.000 |
| succinyltransferase activity                                                                                                                                  | 4/10189, 0.0%  | 4/10487, 0.0%  | 1.000 |
| trialkylsulfonium hydrolase activity                                                                                                                          | 4/10189, 0.0%  | 4/10487, 0.0%  | 1.000 |
| endodeoxyribonuclease activity, producing 5'-phosphomonoesters                                                                                                | 4/10189, 0.0%  | 4/10487, 0.0%  | 1.000 |
| exodeoxyribonuclease activity, producing 5'-phosphomonoesters                                                                                                 | 4/10189, 0.0%  | 4/10487, 0.0%  | 1.000 |
| nucleoside-diphosphatase activity                                                                                                                             | 4/10189, 0.0%  | 4/10487, 0.0%  | 1.000 |
| NAD-dependent histone deacetylase activity                                                                                                                    | 4/10189, 0.0%  | 4/10487, 0.0%  | 1.000 |
| cyclohydrolase activity                                                                                                                                       | 4/10189, 0.0%  | 4/10487, 0.0%  | 1.000 |
| apolipoprotein receptor activity                                                                                                                              | 4/10189, 0.0%  | 4/10487, 0.0%  | 1.000 |
| heparan sulfate sulfotransferase activity                                                                                                                     | 4/10189, 0.0%  | 4/10487, 0.0%  | 1.000 |
| NAD-dependent protein deacetylase activity                                                                                                                    | 4/10189, 0.0%  | 4/10487, 0.0%  | 1.000 |
| histone kinase activity                                                                                                                                       | 4/10189, 0.0%  | 4/10487, 0.0%  | 1.000 |
| proteoglycan binding                                                                                                                                          | 4/10189, 0.0%  | 4/10487, 0.0%  | 1.000 |
| protein phosphorylated amino acid binding                                                                                                                     | 4/10189, 0.0%  | 4/10487, 0.0%  | 1.000 |
| nucleoside-triphosphate diphosphatase activity                                                                                                                | 4/10189, 0.0%  | 4/10487, 0.0%  | 1.000 |
| 3',5'-cyclic-GMP phosphodiesterase activity                                                                                                                   | 4/10189, 0.0%  | 4/10487, 0.0%  | 1.000 |
| galactose 3-O-sulfotransferase activity                                                                                                                       | 4/10189, 0.0%  | 4/10487, 0.0%  | 1.000 |
| cytidyltransferase activity                                                                                                                                   | 4/10189, 0.0%  | 4/10487, 0.0%  | 1.000 |
| organic hydroxy compound transmembrane transporter activity                                                                                                   | 4/10189, 0.0%  | 4/10487, 0.0%  | 1.000 |
| tRNA-specific ribonuclease activity                                                                                                                           | 18/10189, 0.2% | 19/10487, 0.2% | 1.000 |
| metallopeptidase activity                                                                                                                                     | 18/10189, 0.2% | 19/10487, 0.2% | 1.000 |
| tumor necrosis factor receptor superfamily binding                                                                                                            | 18/10189, 0.2% | 19/10487, 0.2% | 1.000 |
| cytokine receptor binding                                                                                                                                     | 81/10189, 0.8% | 85/10487, 0.8% | 1.000 |
| hydrogen ion transmembrane transporter activity                                                                                                               | 36/10189, 0.4% | 38/10487, 0.4% | 1.000 |
| small conjugating protein binding                                                                                                                             | 36/10189, 0.4% | 38/10487, 0.4% | 1.000 |
| voltage-gated cation channel activity                                                                                                                         | 17/10189, 0.2% | 18/10487, 0.2% | 1.000 |



|                                                                         |                   |                   |       |
|-------------------------------------------------------------------------|-------------------|-------------------|-------|
| enzyme activator activity                                               | 129/10189, 1.3%   | 135/10487, 1.3%   | 1.000 |
| nucleic acid binding                                                    | 1473/10189, 14.5% | 1524/10487, 14.5% | 1.000 |
| iron-sulfur cluster binding                                             | 35/10189, 0.3%    | 37/10487, 0.4%    | 1.000 |
| oxidized base lesion DNA N-glycosylase activity                         | 3/10189, 0.0%     | 3/10487, 0.0%     | 1.000 |
| angiotensin receptor activity                                           | 3/10189, 0.0%     | 3/10487, 0.0%     | 1.000 |
| purinergic nucleotide receptor activity                                 | 3/10189, 0.0%     | 3/10487, 0.0%     | 1.000 |
| lipid kinase activity                                                   | 3/10189, 0.0%     | 3/10487, 0.0%     | 1.000 |
| single-stranded RNA binding                                             | 3/10189, 0.0%     | 3/10487, 0.0%     | 1.000 |
| DNA-(apurinic or apyrimidinic site) lyase activity                      | 3/10189, 0.0%     | 3/10487, 0.0%     | 1.000 |
| DNA topoisomerase activity                                              | 3/10189, 0.0%     | 3/10487, 0.0%     | 1.000 |
| branched-chain-amino-acid transaminase activity                         | 3/10189, 0.0%     | 3/10487, 0.0%     | 1.000 |
| phosphoglycerate mutase activity                                        | 3/10189, 0.0%     | 3/10487, 0.0%     | 1.000 |
| cyclic nucleotide-dependent protein kinase activity                     | 3/10189, 0.0%     | 3/10487, 0.0%     | 1.000 |
| MAP kinase activity                                                     | 3/10189, 0.0%     | 3/10487, 0.0%     | 1.000 |
| protein serine/threonine phosphatase activity                           | 3/10189, 0.0%     | 3/10487, 0.0%     | 1.000 |
| sulfate adenylyltransferase activity                                    | 3/10189, 0.0%     | 3/10487, 0.0%     | 1.000 |
| uracil DNA N-glycosylase activity                                       | 3/10189, 0.0%     | 3/10487, 0.0%     | 1.000 |
| interleukin-1 receptor activity                                         | 3/10189, 0.0%     | 3/10487, 0.0%     | 1.000 |
| opioid receptor activity                                                | 3/10189, 0.0%     | 3/10487, 0.0%     | 1.000 |
| transforming growth factor beta receptor, cytoplasmic mediator activity | 3/10189, 0.0%     | 3/10487, 0.0%     | 1.000 |
| vascular endothelial growth factor receptor binding                     | 3/10189, 0.0%     | 3/10487, 0.0%     | 1.000 |
| neurotransmitter:sodium symporter activity                              | 3/10189, 0.0%     | 3/10487, 0.0%     | 1.000 |
| iron ion transmembrane transporter activity                             | 3/10189, 0.0%     | 3/10487, 0.0%     | 1.000 |
| alcohol dehydrogenase (NADP+) activity                                  | 3/10189, 0.0%     | 3/10487, 0.0%     | 1.000 |
| mRNA methyltransferase activity                                         | 3/10189, 0.0%     | 3/10487, 0.0%     | 1.000 |
| RNA guanylyltransferase activity                                        | 3/10189, 0.0%     | 3/10487, 0.0%     | 1.000 |
| ion channel inhibitor activity                                          | 3/10189, 0.0%     | 3/10487, 0.0%     | 1.000 |
| tetracycline transporter activity                                       | 3/10189, 0.0%     | 3/10487, 0.0%     | 1.000 |
| monoamine transmembrane transporter activity                            | 3/10189, 0.0%     | 3/10487, 0.0%     | 1.000 |
| oxidized purine nucleobase lesion DNA N-glycosylase activity            | 3/10189, 0.0%     | 3/10487, 0.0%     | 1.000 |
| NAD(P)+ transhydrogenase activity                                       | 3/10189, 0.0%     | 3/10487, 0.0%     | 1.000 |
| bis(5'-nucleosyl)-tetrphosphatase activity                              | 3/10189, 0.0%     | 3/10487, 0.0%     | 1.000 |
| mannose-phosphate guanylyltransferase activity                          | 3/10189, 0.0%     | 3/10487, 0.0%     | 1.000 |

|                                                                                                                                                                                                 |               |               |       |
|-------------------------------------------------------------------------------------------------------------------------------------------------------------------------------------------------|---------------|---------------|-------|
| phosphate ion transmembrane transporter activity                                                                                                                                                | 3/10189, 0.0% | 3/10487, 0.0% | 1.000 |
| polyol transmembrane transporter activity                                                                                                                                                       | 3/10189, 0.0% | 3/10487, 0.0% | 1.000 |
| calcium-activated potassium channel activity                                                                                                                                                    | 3/10189, 0.0% | 3/10487, 0.0% | 1.000 |
| acetylcholine receptor activity                                                                                                                                                                 | 3/10189, 0.0% | 3/10487, 0.0% | 1.000 |
| glucosidase activity                                                                                                                                                                            | 3/10189, 0.0% | 3/10487, 0.0% | 1.000 |
| acyl-CoA desaturase activity                                                                                                                                                                    | 3/10189, 0.0% | 3/10487, 0.0% | 1.000 |
| O-acetyltransferase activity                                                                                                                                                                    | 3/10189, 0.0% | 3/10487, 0.0% | 1.000 |
| C-acetyltransferase activity                                                                                                                                                                    | 3/10189, 0.0% | 3/10487, 0.0% | 1.000 |
| oxidoreductase activity, acting on the CH-NH group of donors, quinone or similar compound as acceptor                                                                                           | 3/10189, 0.0% | 3/10487, 0.0% | 1.000 |
| oxidoreductase activity, acting on NAD(P)H, NAD(P) as acceptor                                                                                                                                  | 3/10189, 0.0% | 3/10487, 0.0% | 1.000 |
| oxidoreductase activity, acting on paired donors, with incorporation or reduction of molecular O <sub>2</sub> , reduced pteridine as one donor, and incorporation of one atom of O <sub>2</sub> | 3/10189, 0.0% | 3/10487, 0.0% | 1.000 |
| oxidoreductase activity, oxidizing metal ions, NAD or NADP as acceptor                                                                                                                          | 3/10189, 0.0% | 3/10487, 0.0% | 1.000 |
| N-succinyltransferase activity                                                                                                                                                                  | 3/10189, 0.0% | 3/10487, 0.0% | 1.000 |
| phosphotransferase activity, carboxyl group as acceptor                                                                                                                                         | 3/10189, 0.0% | 3/10487, 0.0% | 1.000 |
| hydrolase activity, acting on acid carbon-carbon bonds                                                                                                                                          | 3/10189, 0.0% | 3/10487, 0.0% | 1.000 |
| hydrolase activity, acting on acid carbon-carbon bonds, in ketonic substances                                                                                                                   | 3/10189, 0.0% | 3/10487, 0.0% | 1.000 |
| amidine-lyase activity                                                                                                                                                                          | 3/10189, 0.0% | 3/10487, 0.0% | 1.000 |
| endodeoxyribonuclease activity, producing 3'-phosphomonoesters                                                                                                                                  | 3/10189, 0.0% | 3/10487, 0.0% | 1.000 |
| G-protein coupled acetylcholine receptor activity                                                                                                                                               | 3/10189, 0.0% | 3/10487, 0.0% | 1.000 |
| SAP kinase activity                                                                                                                                                                             | 3/10189, 0.0% | 3/10487, 0.0% | 1.000 |
| alpha-sialidase activity                                                                                                                                                                        | 3/10189, 0.0% | 3/10487, 0.0% | 1.000 |
| CDP-alcohol phosphatidyltransferase activity                                                                                                                                                    | 3/10189, 0.0% | 3/10487, 0.0% | 1.000 |
| toxin transporter activity                                                                                                                                                                      | 3/10189, 0.0% | 3/10487, 0.0% | 1.000 |
| immunoglobulin receptor activity                                                                                                                                                                | 3/10189, 0.0% | 3/10487, 0.0% | 1.000 |
| interferon binding                                                                                                                                                                              | 3/10189, 0.0% | 3/10487, 0.0% | 1.000 |
| translation initiation factor binding                                                                                                                                                           | 3/10189, 0.0% | 3/10487, 0.0% | 1.000 |
| polyubiquitin binding                                                                                                                                                                           | 3/10189, 0.0% | 3/10487, 0.0% | 1.000 |
| bombesin receptor binding                                                                                                                                                                       | 3/10189, 0.0% | 3/10487, 0.0% | 1.000 |

|                                                                                           |                |                |       |
|-------------------------------------------------------------------------------------------|----------------|----------------|-------|
| DNA insertion or deletion binding                                                         | 3/10189, 0.0%  | 3/10487, 0.0%  | 1.000 |
| apolipoprotein binding                                                                    | 3/10189, 0.0%  | 3/10487, 0.0%  | 1.000 |
| peptide N-acetyltransferase activity                                                      | 3/10189, 0.0%  | 3/10487, 0.0%  | 1.000 |
| phosphatidylinositol bisphosphate phosphatase activity                                    | 3/10189, 0.0%  | 3/10487, 0.0%  | 1.000 |
| histone threonine kinase activity                                                         | 3/10189, 0.0%  | 3/10487, 0.0%  | 1.000 |
| purinergic receptor activity                                                              | 3/10189, 0.0%  | 3/10487, 0.0%  | 1.000 |
| antibiotic transporter activity                                                           | 3/10189, 0.0%  | 3/10487, 0.0%  | 1.000 |
| G-protein coupled purinergic nucleotide receptor activity                                 | 3/10189, 0.0%  | 3/10487, 0.0%  | 1.000 |
| quinone binding                                                                           | 3/10189, 0.0%  | 3/10487, 0.0%  | 1.000 |
| UTP-monosaccharide-1-phosphate uridylyltransferase activity                               | 3/10189, 0.0%  | 3/10487, 0.0%  | 1.000 |
| carboxylic ester hydrolase activity                                                       | 3/10189, 0.0%  | 3/10487, 0.0%  | 1.000 |
| phosphatidylinositol phosphate phosphatase activity                                       | 3/10189, 0.0%  | 3/10487, 0.0%  | 1.000 |
| lipase activator activity                                                                 | 3/10189, 0.0%  | 3/10487, 0.0%  | 1.000 |
| peptidyl-lysine 5-dioxygenase activity                                                    | 3/10189, 0.0%  | 3/10487, 0.0%  | 1.000 |
| drug transporter activity                                                                 | 3/10189, 0.0%  | 3/10487, 0.0%  | 1.000 |
| deaminated base DNA N-glycosylase activity                                                | 3/10189, 0.0%  | 3/10487, 0.0%  | 1.000 |
| double-stranded DNA binding                                                               | 16/10189, 0.2% | 17/10487, 0.2% | 1.000 |
| protein transporter activity                                                              | 16/10189, 0.2% | 17/10487, 0.2% | 1.000 |
| hydrolase activity, acting on carbon-nitrogen (but not peptide) bonds, in cyclic amidines | 16/10189, 0.2% | 17/10487, 0.2% | 1.000 |
| calcium channel activity                                                                  | 15/10189, 0.1% | 16/10487, 0.2% | 1.000 |
| calcium ion transmembrane transporter activity                                            | 15/10189, 0.1% | 16/10487, 0.2% | 1.000 |
| oxidoreductase activity, acting on the CH-NH2 group of donors, O <sub>2</sub> as acceptor | 15/10189, 0.1% | 16/10487, 0.2% | 1.000 |
| divalent inorganic cation transmembrane transporter activity                              | 15/10189, 0.1% | 16/10487, 0.2% | 1.000 |
| protein transmembrane transporter activity                                                | 14/10189, 0.1% | 15/10487, 0.1% | 1.000 |
| macromolecule transmembrane transporter activity                                          | 14/10189, 0.1% | 15/10487, 0.1% | 1.000 |
| RNA cap binding                                                                           | 2/10189, 0.0%  | 2/10487, 0.0%  | 1.000 |
| damaged DNA binding                                                                       | 2/10189, 0.0%  | 2/10487, 0.0%  | 1.000 |
| 11-beta-hydroxysteroid dehydrogenase [NAD(P)] activity                                    | 2/10189, 0.0%  | 2/10487, 0.0%  | 1.000 |
| DNA-directed RNA polymerase activity                                                      | 2/10189, 0.0%  | 2/10487, 0.0%  | 1.000 |
| glycogen debranching enzyme activity                                                      | 2/10189, 0.0%  | 2/10487, 0.0%  | 1.000 |
| farnesyltransferase activity                                                              | 2/10189, 0.0%  | 2/10487, 0.0%  | 1.000 |

|                                                                                                                                          |               |               |       |
|------------------------------------------------------------------------------------------------------------------------------------------|---------------|---------------|-------|
| exoribonuclease activity                                                                                                                 | 2/10189, 0.0% | 2/10487, 0.0% | 1.000 |
| alpha-1,4-glucosidase activity                                                                                                           | 2/10189, 0.0% | 2/10487, 0.0% | 1.000 |
| phosphoenolpyruvate carboxykinase activity                                                                                               | 2/10189, 0.0% | 2/10487, 0.0% | 1.000 |
| phospholipase A2 activity                                                                                                                | 2/10189, 0.0% | 2/10487, 0.0% | 1.000 |
| phosphorylase activity                                                                                                                   | 2/10189, 0.0% | 2/10487, 0.0% | 1.000 |
| saccharopine dehydrogenase activity                                                                                                      | 2/10189, 0.0% | 2/10487, 0.0% | 1.000 |
| ciliary neurotrophic factor receptor activity                                                                                            | 2/10189, 0.0% | 2/10487, 0.0% | 1.000 |
| beta-adrenergic receptor activity                                                                                                        | 2/10189, 0.0% | 2/10487, 0.0% | 1.000 |
| leukotriene receptor activity                                                                                                            | 2/10189, 0.0% | 2/10487, 0.0% | 1.000 |
| death receptor activity                                                                                                                  | 2/10189, 0.0% | 2/10487, 0.0% | 1.000 |
| nuclear export signal receptor activity                                                                                                  | 2/10189, 0.0% | 2/10487, 0.0% | 1.000 |
| fibroblast growth factor receptor binding                                                                                                | 2/10189, 0.0% | 2/10487, 0.0% | 1.000 |
| intracellular cyclic nucleotide activated cation channel activity                                                                        | 2/10189, 0.0% | 2/10487, 0.0% | 1.000 |
| inhibitory extracellular ligand-gated ion channel activity                                                                               | 2/10189, 0.0% | 2/10487, 0.0% | 1.000 |
| L-glutamate transmembrane transporter activity                                                                                           | 2/10189, 0.0% | 2/10487, 0.0% | 1.000 |
| insulin-like growth factor binding                                                                                                       | 2/10189, 0.0% | 2/10487, 0.0% | 1.000 |
| high-density lipoprotein particle binding                                                                                                | 2/10189, 0.0% | 2/10487, 0.0% | 1.000 |
| 5'-3' exonuclease activity                                                                                                               | 2/10189, 0.0% | 2/10487, 0.0% | 1.000 |
| CoA-transferase activity                                                                                                                 | 2/10189, 0.0% | 2/10487, 0.0% | 1.000 |
| histone-arginine N-methyltransferase activity                                                                                            | 2/10189, 0.0% | 2/10487, 0.0% | 1.000 |
| basic amino acid transmembrane transporter activity                                                                                      | 2/10189, 0.0% | 2/10487, 0.0% | 1.000 |
| oligopeptide transporter activity                                                                                                        | 2/10189, 0.0% | 2/10487, 0.0% | 1.000 |
| nucleobase transmembrane transporter activity                                                                                            | 2/10189, 0.0% | 2/10487, 0.0% | 1.000 |
| secondary active oligopeptide transmembrane transporter activity                                                                         | 2/10189, 0.0% | 2/10487, 0.0% | 1.000 |
| peptide-transporting ATPase activity                                                                                                     | 2/10189, 0.0% | 2/10487, 0.0% | 1.000 |
| aspartate oxidase activity                                                                                                               | 2/10189, 0.0% | 2/10487, 0.0% | 1.000 |
| ammonia ligase activity                                                                                                                  | 2/10189, 0.0% | 2/10487, 0.0% | 1.000 |
| S-acyltransferase activity                                                                                                               | 2/10189, 0.0% | 2/10487, 0.0% | 1.000 |
| tRNA (adenine) methyltransferase activity                                                                                                | 2/10189, 0.0% | 2/10487, 0.0% | 1.000 |
| oxidoreductase activity, acting on a sulfur group of donors, NAD(P) as acceptor                                                          | 2/10189, 0.0% | 2/10487, 0.0% | 1.000 |
| oxidoreductase activity, acting on a sulfur group of donors, O <sub>2</sub> as acceptor                                                  | 2/10189, 0.0% | 2/10487, 0.0% | 1.000 |
| oxidoreductase activity, acting on paired donors, with incorporation or reduction of molecular O <sub>2</sub> , reduced ascorbate as one | 2/10189, 0.0% | 2/10487, 0.0% | 1.000 |

|                                                                                                                                                                                                |               |               |       |
|------------------------------------------------------------------------------------------------------------------------------------------------------------------------------------------------|---------------|---------------|-------|
| donor, and incorporation of one atom of O <sub>2</sub>                                                                                                                                         |               |               |       |
| oxidoreductase activity, acting on paired donors, with incorporation or reduction of molecular O <sub>2</sub> , another compound as one donor, and incorporation of one atom of O <sub>2</sub> | 2/10189, 0.0% | 2/10487, 0.0% | 1.000 |
| oxidoreductase activity, acting on CH or CH <sub>2</sub> groups, NAD or NADP as acceptor                                                                                                       | 2/10189, 0.0% | 2/10487, 0.0% | 1.000 |
| oxidoreductase activity, acting on CH or CH <sub>2</sub> groups, O <sub>2</sub> as acceptor                                                                                                    | 2/10189, 0.0% | 2/10487, 0.0% | 1.000 |
| oxidoreductase activity, acting on CH or CH <sub>2</sub> groups, disulfide as acceptor                                                                                                         | 2/10189, 0.0% | 2/10487, 0.0% | 1.000 |
| oxo-acid-lyase activity                                                                                                                                                                        | 2/10189, 0.0% | 2/10487, 0.0% | 1.000 |
| acid-ammonia (or amide) ligase activity                                                                                                                                                        | 2/10189, 0.0% | 2/10487, 0.0% | 1.000 |
| ligase activity, forming phosphoric ester bonds                                                                                                                                                | 2/10189, 0.0% | 2/10487, 0.0% | 1.000 |
| oxidoreductase activity, acting on the CH-OH group of donors, quinone or similar compound as acceptor                                                                                          | 2/10189, 0.0% | 2/10487, 0.0% | 1.000 |
| snRNA binding                                                                                                                                                                                  | 2/10189, 0.0% | 2/10487, 0.0% | 1.000 |
| sodium:dicarboxylate symporter activity                                                                                                                                                        | 2/10189, 0.0% | 2/10487, 0.0% | 1.000 |
| interleukin-12 binding                                                                                                                                                                         | 2/10189, 0.0% | 2/10487, 0.0% | 1.000 |
| alpha-(1,2)-fucosyltransferase activity                                                                                                                                                        | 2/10189, 0.0% | 2/10487, 0.0% | 1.000 |
| opioid receptor binding                                                                                                                                                                        | 2/10189, 0.0% | 2/10487, 0.0% | 1.000 |
| endothelial differentiation G-protein coupled receptor binding                                                                                                                                 | 2/10189, 0.0% | 2/10487, 0.0% | 1.000 |
| single base insertion or deletion binding                                                                                                                                                      | 2/10189, 0.0% | 2/10487, 0.0% | 1.000 |
| oxidized DNA binding                                                                                                                                                                           | 2/10189, 0.0% | 2/10487, 0.0% | 1.000 |
| demethylase activity                                                                                                                                                                           | 2/10189, 0.0% | 2/10487, 0.0% | 1.000 |
| histone demethylase activity                                                                                                                                                                   | 2/10189, 0.0% | 2/10487, 0.0% | 1.000 |
| oxoglutarate dehydrogenase [NAD(P)+] activity                                                                                                                                                  | 2/10189, 0.0% | 2/10487, 0.0% | 1.000 |
| glutamate receptor binding                                                                                                                                                                     | 2/10189, 0.0% | 2/10487, 0.0% | 1.000 |
| 5'-3' exodeoxyribonuclease activity                                                                                                                                                            | 2/10189, 0.0% | 2/10487, 0.0% | 1.000 |
| oligopeptide transmembrane transporter activity                                                                                                                                                | 2/10189, 0.0% | 2/10487, 0.0% | 1.000 |
| neurotrophin binding                                                                                                                                                                           | 2/10189, 0.0% | 2/10487, 0.0% | 1.000 |
| laminin binding                                                                                                                                                                                | 2/10189, 0.0% | 2/10487, 0.0% | 1.000 |
| cyclic nucleotide-gated ion channel activity                                                                                                                                                   | 2/10189, 0.0% | 2/10487, 0.0% | 1.000 |
| alpha-(1->6)-fucosyltransferase activity                                                                                                                                                       | 2/10189, 0.0% | 2/10487, 0.0% | 1.000 |
| TAP binding                                                                                                                                                                                    | 2/10189, 0.0% | 2/10487, 0.0% | 1.000 |
| dopamine receptor binding                                                                                                                                                                      | 2/10189, 0.0% | 2/10487, 0.0% | 1.000 |
| extracellular matrix binding                                                                                                                                                                   | 2/10189, 0.0% | 2/10487, 0.0% | 1.000 |
| cofactor transporter activity                                                                                                                                                                  | 2/10189, 0.0% | 2/10487, 0.0% | 1.000 |

|                                                               |                 |                 |       |
|---------------------------------------------------------------|-----------------|-----------------|-------|
| BH domain binding                                             | 2/10189, 0.0%   | 2/10487, 0.0%   | 1.000 |
| inositol tetrakisphosphate kinase activity                    | 2/10189, 0.0%   | 2/10487, 0.0%   | 1.000 |
| inositol phosphate phosphatase activity                       | 2/10189, 0.0%   | 2/10487, 0.0%   | 1.000 |
| ligase regulator activity                                     | 2/10189, 0.0%   | 2/10487, 0.0%   | 1.000 |
| L-tyrosine aminotransferase activity                          | 2/10189, 0.0%   | 2/10487, 0.0%   | 1.000 |
| alpha-glucosidase activity                                    | 2/10189, 0.0%   | 2/10487, 0.0%   | 1.000 |
| endonuclease activity                                         | 47/10189, 0.5%  | 50/10487, 0.5%  | 1.000 |
| SNARE binding                                                 | 12/10189, 0.1%  | 13/10487, 0.1%  | 1.000 |
| peroxidase activity                                           | 12/10189, 0.1%  | 13/10487, 0.1%  | 1.000 |
| amine transmembrane transporter activity                      | 12/10189, 0.1%  | 13/10487, 0.1%  | 1.000 |
| oxidoreductase activity, acting on peroxide as acceptor       | 12/10189, 0.1%  | 13/10487, 0.1%  | 1.000 |
| isoprenoid binding                                            | 12/10189, 0.1%  | 13/10487, 0.1%  | 1.000 |
| protein binding, bridging                                     | 12/10189, 0.1%  | 13/10487, 0.1%  | 1.000 |
| binding, bridging                                             | 12/10189, 0.1%  | 13/10487, 0.1%  | 1.000 |
| protein domain specific binding                               | 134/10189, 1.3% | 141/10487, 1.3% | 1.000 |
| G-protein coupled receptor binding                            | 45/10189, 0.4%  | 48/10487, 0.5%  | 1.000 |
| carboxylic acid binding                                       | 45/10189, 0.4%  | 48/10487, 0.5%  | 1.000 |
| organic acid binding                                          | 45/10189, 0.4%  | 48/10487, 0.5%  | 1.000 |
| retinoid binding                                              | 11/10189, 0.1%  | 12/10487, 0.1%  | 1.000 |
| oxidoreductase activity, acting on the CH-NH group of donors  | 25/10189, 0.2%  | 27/10487, 0.3%  | 1.000 |
| iron ion binding                                              | 177/10189, 1.7% | 186/10487, 1.8% | 1.000 |
| phospholipid transporter activity                             | 10/10189, 0.1%  | 11/10487, 0.1%  | 1.000 |
| inositol trisphosphate kinase activity                        | 10/10189, 0.1%  | 11/10487, 0.1%  | 1.000 |
| acylglycerol O-acyltransferase activity                       | 9/10189, 0.1%   | 10/10487, 0.1%  | 1.000 |
| intramolecular oxidoreductase activity, transposing C=C bonds | 9/10189, 0.1%   | 10/10487, 0.1%  | 1.000 |
| hormone binding                                               | 9/10189, 0.1%   | 10/10487, 0.1%  | 1.000 |
| translation regulator activity                                | 9/10189, 0.1%   | 10/10487, 0.1%  | 1.000 |
| lipoprotein particle receptor binding                         | 9/10189, 0.1%   | 10/10487, 0.1%  | 1.000 |
| isomerase activity                                            | 141/10189, 1.4% | 149/10487, 1.4% | 1.000 |
| carbon-nitrogen lyase activity                                | 8/10189, 0.1%   | 9/10487, 0.1%   | 1.000 |
| kinase activator activity                                     | 8/10189, 0.1%   | 9/10487, 0.1%   | 1.000 |
| phosphatase inhibitor activity                                | 8/10189, 0.1%   | 9/10487, 0.1%   | 1.000 |
| protein kinase activator activity                             | 8/10189, 0.1%   | 9/10487, 0.1%   | 1.000 |
| growth factor binding                                         | 34/10189, 0.3%  | 37/10487, 0.4%  | 1.000 |
| neuropeptide receptor binding                                 | 7/10189, 0.1%   | 8/10487, 0.1%   | 1.000 |
| oxidoreductase activity, acting on NAD(P)H                    | 48/10189, 0.5%  | 52/10487, 0.5%  | 1.000 |
| ubiquitin binding                                             | 15/10189, 0.1%  | 17/10487, 0.2%  | 1.000 |
| 3'-5' exonuclease activity                                    | 5/10189, 0.0%   | 6/10487, 0.1%   | 1.000 |
| receptor binding                                              | 512/10189, 5.0% | 536/10487, 5.1% | 1.000 |
| cis-trans isomerase activity                                  | 59/10189, 0.6%  | 64/10487, 0.6%  | 1.000 |

|                                                                                                              |                 |                 |       |
|--------------------------------------------------------------------------------------------------------------|-----------------|-----------------|-------|
| ribonuclease activity                                                                                        | 41/10189, 0.4%  | 45/10487, 0.4%  | 1.000 |
| oxidoreductase activity                                                                                      | 585/10189, 5.7% | 612/10487, 5.8% | 1.000 |
| receptor regulator activity                                                                                  | 13/10189, 0.1%  | 15/10487, 0.1%  | 1.000 |
| ribonucleoprotein complex binding                                                                            | 25/10189, 0.2%  | 28/10487, 0.3%  | 1.000 |
| voltage-gated calcium channel activity                                                                       | 4/10189, 0.0%   | 5/10487, 0.0%   | 1.000 |
| protein-hormone receptor activity                                                                            | 4/10189, 0.0%   | 5/10487, 0.0%   | 1.000 |
| ammonia-lyase activity                                                                                       | 4/10189, 0.0%   | 5/10487, 0.0%   | 1.000 |
| peptide hormone binding                                                                                      | 4/10189, 0.0%   | 5/10487, 0.0%   | 1.000 |
| clathrin binding                                                                                             | 4/10189, 0.0%   | 5/10487, 0.0%   | 1.000 |
| oxidoreductase activity, acting on NAD(P)H, quinone as acceptor                                              | 24/10189, 0.2%  | 27/10487, 0.3%  | 1.000 |
| oxidoreductase activity, acting on a sulfur group of donors                                                  | 37/10189, 0.4%  | 41/10487, 0.4%  | 1.000 |
| cytokine activity                                                                                            | 34/10189, 0.3%  | 38/10487, 0.4%  | 1.000 |
| RNA polymerase activity                                                                                      | 34/10189, 0.3%  | 38/10487, 0.4%  | 1.000 |
| hormone activity                                                                                             | 10/10189, 0.1%  | 12/10487, 0.1%  | 1.000 |
| oxidoreductase activity, acting on a sulfur group of donors, disulfide as acceptor                           | 10/10189, 0.1%  | 12/10487, 0.1%  | 1.000 |
| racemase and epimerase activity                                                                              | 10/10189, 0.1%  | 12/10487, 0.1%  | 1.000 |
| endoribonuclease activity                                                                                    | 20/10189, 0.2%  | 23/10487, 0.2%  | 1.000 |
| NADH dehydrogenase activity                                                                                  | 18/10189, 0.2%  | 21/10487, 0.2%  | 1.000 |
| calcium channel regulator activity                                                                           | 2/10189, 0.0%   | 3/10487, 0.0%   | 1.000 |
| copper ion binding                                                                                           | 2/10189, 0.0%   | 3/10487, 0.0%   | 1.000 |
| melanocortin receptor binding                                                                                | 2/10189, 0.0%   | 3/10487, 0.0%   | 1.000 |
| NADH dehydrogenase (quinone) activity                                                                        | 17/10189, 0.2%  | 20/10487, 0.2%  | 1.000 |
| channel regulator activity                                                                                   | 16/10189, 0.2%  | 19/10487, 0.2%  | 1.000 |
| amino acid binding                                                                                           | 16/10189, 0.2%  | 19/10487, 0.2%  | 1.000 |
| fibroblast growth factor binding                                                                             | 6/10189, 0.1%   | 8/10487, 0.1%   | 1.000 |
| cytokine binding                                                                                             | 6/10189, 0.1%   | 8/10487, 0.1%   | 1.000 |
| endonuclease activity, active with either ribo- or deoxyribonucleic acids and producing 3'-phosphomonoesters | 13/10189, 0.1%  | 16/10487, 0.2%  | 1.000 |
| disulfide oxidoreductase activity                                                                            | 21/10189, 0.2%  | 25/10487, 0.2%  | 1.000 |
| endoribonuclease activity, producing 3'-phosphomonoesters                                                    | 10/10189, 0.1%  | 13/10487, 0.1%  | 1.000 |
| nucleobase-containing compound kinase activity                                                               | 10/10189, 0.1%  | 13/10487, 0.1%  | 1.000 |
| channel inhibitor activity                                                                                   | 3/10189, 0.0%   | 5/10487, 0.0%   | 1.000 |
| nucleoside kinase activity                                                                                   | 7/10189, 0.1%   | 10/10487, 0.1%  | 1.000 |
| myosin binding                                                                                               | 2/10189, 0.0%   | 4/10487, 0.0%   | 1.000 |
| protein tyrosine/serine/threonine phosphatase activity                                                       | 10/10189, 0.1%  | 14/10487, 0.1%  | 1.000 |
| structural molecule activity                                                                                 | 333/10189, 3.3% | 374/10487, 3.6% | 1.000 |
| heme-copper terminal oxidase activity                                                                        | 24/10189, 0.2%  | 36/10487, 0.3%  | 1.000 |

### Supplementary Table S7

Quantative real-time PCR primers for target miRNAs

|             | Forward                 | Reverse                            |
|-------------|-------------------------|------------------------------------|
| Mir-93      | AACTGTTTGCAGAGGAAACTGA  | GTGACTGGAGTTCAGACGTGTGCTCTTCCGATCT |
| Mir-20      | TCCCTGAGACCCTAACTTGTGAT |                                    |
| Mir-81      | TAGCAGCGGGAACAGTACTGCAG |                                    |
| Mir-21-5p   | TAGCTTATCAGACTGATGTTGAC |                                    |
| Mir-127-3p  | TCGGATCCGTCTGAGCTTGG    |                                    |
| Mir-199b-5p | CCCAGTGTTTAGACTATCTGTTC |                                    |
| b-actin     | cctgacggcatgtaattaccg   | tctcaccgataccaacagct               |
